# Supplementary material for: Weighted correlation gene network analysis reveals a new stemness index-related survival model for prognostic prediction in hepatocellular carcinoma
Source: Aging (Albany NY). 2020 Jul 9;12(13):13502–17. doi: 10.18632/aging.103454 (PMC7377834; doi:10.18632/aging.103454)
Supplement: Supplementary Table 1 [file aging-12-103454-s005..xlsx]

## Sheet: Sheet1
Supplementary Table 1. List of 7498 DEGs in HCC tumor tissues.
gene	conMean	treatMean	logFC	pValue	fdr
SPP1	10.4824	336.86	5.00611	2.72e-07	4.49e-07
SCAANT1	0.230962	0.481044	1.05851	0.000373838	0.000489821
WASH8P	1.31	3.84967	1.55517	1.34e-16	4.94e-16
JTB	59.6184	121.354	1.02539	3.31e-23	3.63e-22
ANAPC11	10.2936	26.4604	1.36209	3.88e-23	4.15e-22
ZNF738	0.0778026	0.408757	2.39335	5.76e-12	1.36e-11
AC022007.1	0.135075	0.54959	2.0246	5.67e-23	5.86e-22
F2RL3	0.160029	1.23996	2.95389	1.95e-16	7.09e-16
CEP72	0.393633	1.64754	2.06539	1.83e-23	2.16e-22
RABL6	1.18795	3.28535	1.46757	2.28e-23	2.61e-22
AP000254.1	1.25476	2.52173	1.007	6.47e-13	1.66e-12
AC006449.6	0.636535	1.28247	1.01062	1.33e-09	2.61e-09
SSNA1	17.4439	39.8413	1.19154	8.7e-22	6.95e-21
SNORD59A	0.124971	0.275982	1.14299	0.00506761	0.0061044
TATDN2	1.40971	3.57288	1.34169	1.28e-25	3.12e-24
ENO1-AS1	0.0935818	0.284062	1.60191	6.09e-07	9.81e-07
GUK1	19.8499	43.0514	1.11693	8.6e-22	6.87e-21
TELO2	3.01784	7.59934	1.33236	1.52e-26	5.95e-25
CD1D	5.08073	2.52613	-1.00811	3.35e-15	1.06e-14
FAM78B	0.135031	0.502058	1.89457	2.8e-17	1.12e-16
SLC47A1P1	0.0948722	0.237003	1.32085	5.18e-07	8.38e-07
SLC1A3	0.376073	1.30782	1.79808	1.13e-11	2.61e-11
CCDC24	0.612324	1.95164	1.67232	9.96e-19	4.75e-18
CPT1C	0.112498	0.356504	1.66402	1.18e-13	3.24e-13
RAD54L	0.0498512	0.899287	4.17308	1.82e-25	4.18e-24
CPNE1	8.75424	22.1309	1.33801	2.07e-20	1.27e-19
TRAF7	6.43083	14.5447	1.17741	2.13e-19	1.12e-18
NOP14-AS1	0.508031	1.08681	1.09712	4.54e-21	3.16e-20
PRRC2A	7.16396	17.7911	1.31232	2.47e-20	1.5e-19
AP003068.4	0.120253	1.31547	3.45144	5.82e-18	2.53e-17
TSPO2	0.115371	0.807958	2.808	1.83e-15	5.99e-15
LINC01116	0.0304118	0.515883	4.08434	8.87e-19	4.26e-18
LINC01942	0.689695	1.45085	1.07286	2.74e-06	4.2e-06
NAP1L1	4.35896	10.7186	1.29806	1.69e-18	7.78e-18
PHETA2	0.653556	1.78468	1.44928	0.00626787	0.00749342
FLJ42351	0.431565	0.885701	1.03724	4.72e-13	1.23e-12
AP001271.1	0.0915286	0.312893	1.77338	0.0037292	0.00454731
TM4SF1-AS1	0.0632851	0.310372	2.29406	5.64e-12	1.33e-11
DCTPP1	6.25932	15.0109	1.26194	2.47e-22	2.18e-21
PIK3R3	0.702703	1.70745	1.28085	1.9e-18	8.71e-18
CENPJ	0.249411	0.974339	1.9659	1.03e-23	1.3e-22
UHRF1	0.0873013	1.40283	4.00619	6.42e-25	1.19e-23
AC119150.1	0.0961943	0.517914	2.42869	0.000322428	0.000424393
ZBED5	0.72971	1.7576	1.26821	8.75e-20	4.86e-19
RNPC3	0.317199	0.949376	1.58159	3e-20	1.8e-19
RIMKLBP2	0.0557394	0.23736	2.09031	1.1e-10	2.35e-10
DEPTOR	5.14208	10.4131	1.01798	5.75e-13	1.48e-12
ZNF696	0.54097	1.96562	1.86136	8.01e-28	8.25e-26
AC141586.1	0.160577	0.351226	1.12913	3.3e-14	9.54e-14
AL022322.1	0.0804319	0.480655	2.57916	2.9e-20	1.74e-19
AKR1C2	16.2497	50.1002	1.62441	5.01e-06	7.53e-06
FO538757.1	0.310658	0.99298	1.67644	3.34e-22	2.9e-21
ATOX1	11.3165	26.424	1.22342	2.85e-16	1.01e-15
AC018804.1	0.0863259	0.23007	1.41421	4.25e-05	5.97e-05
PAEP	0.00906494	11.1086	10.2591	2.23e-11	5.01e-11
AC026254.2	0.0532331	0.270003	2.34258	7.59e-14	2.12e-13
LINC02012	0.33688	0.844201	1.32535	0.000139747	0.000188644
CCNE2	0.0777643	0.570302	2.87455	1.61e-21	1.23e-20
GAREM2	0.0651581	0.495078	2.92564	1.35e-14	4.02e-14
LZTS3	1.43484	3.63156	1.3397	4.68e-15	1.46e-14
FOXC1	0.39899	1.16622	1.54742	0.00209615	0.00260396
CHD7	0.515005	1.13892	1.14501	2.61e-12	6.35e-12
RPL32	84.8178	172.94	1.02783	1.46e-13	3.98e-13
PTPRF	16.2582	32.6068	1.004	5.86e-12	1.38e-11
LINC02163	0.00120967	1.02129	9.72156	1.64e-14	4.86e-14
COX4I2	0.280618	2.96131	3.39956	2.98e-27	1.9e-25
CYTH3	0.76946	2.05494	1.41718	9.03e-16	3.04e-15
CEP41	0.20866	0.582833	1.48193	1.03e-22	1e-21
LINC02298	0.129878	0.703709	2.43782	8.98e-05	0.000123078
LINC01315	0.163606	0.665645	2.02453	4.72e-13	1.23e-12
C1QL1	0.293619	6.8761	4.54957	7e-10	1.4e-09
C6orf52	0.197531	0.625559	1.66307	5.45e-05	7.6e-05
AC092171.4	0.0514404	0.476922	3.21278	3.14e-25	6.53e-24
ENO3	15.2563	7.19152	-1.08504	1.05e-13	2.89e-13
DBF4B	0.144919	0.716143	2.305	1.37e-25	3.29e-24
DUSP26	0.0536095	0.23119	2.10852	0.00464444	0.0056137
DLL4	0.904068	3.05502	1.75668	9.02e-22	7.16e-21
AC016590.3	0.094312	0.260988	1.46847	6.16e-10	1.23e-09
SASS6	0.278304	0.971872	1.80411	4.85e-20	2.8e-19
AC108134.2	0.14337	0.57769	2.01056	7.32e-14	2.04e-13
TRIM56	2.04947	4.28516	1.0641	1.06e-19	5.8e-19
WDR53	1.56497	3.34782	1.09709	6.26e-25	1.16e-23
EDA2R	0.150746	0.492836	1.70899	0.000210548	0.000280787
AC073861.1	2.9235	7.28368	1.31697	2e-11	4.52e-11
AC019257.1	0.399581	0.185852	-1.10433	4.72e-15	1.47e-14
SP6	0.0268931	0.378873	3.81641	2.44e-24	3.67e-23
FBLL1	0.292641	1.17242	2.00228	0.00239292	0.00296226
UNC119B	0.800998	2.97125	1.8912	1.39e-20	8.83e-20
AC239803.3	0.0263997	0.268518	3.34642	1.8e-12	4.45e-12
CLIC5	0.0948695	0.411256	2.11602	2.96e-08	5.23e-08
SCN4A	0.0346435	0.223416	2.68908	4.04e-21	2.84e-20
CASK	1.46275	3.40505	1.21899	5.59e-17	2.15e-16
PLAGL2	0.840198	1.98532	1.24057	4.07e-12	9.73e-12
RTL8A	8.06326	19.4234	1.26836	1.37e-11	3.13e-11
AL354733.3	0.26252	0.553279	1.07558	0.00107448	0.00136071
AL135905.1	1.39851	3.80397	1.44362	4.8e-12	1.14e-11
GRIN2D	0.0837464	0.280833	1.74561	4.51e-06	6.8e-06
TPM3P6	0.130908	0.383596	1.55103	2.03e-07	3.38e-07
AC004477.3	0.19414	0.522787	1.42913	4.73e-19	2.36e-18
SH2B1	2.27421	5.27285	1.21322	1.08e-23	1.35e-22
CDK4	5.45097	14.2082	1.38214	8.35e-19	4.03e-18
BRD8	1.78726	4.49916	1.33191	1.85e-24	2.91e-23
AL591848.4	0.174788	0.451669	1.36966	4.72e-10	9.55e-10
MIR3685	0.95985	3.19547	1.73515	1.35e-11	3.08e-11
AC137932.1	0.28089	0.805178	1.5193	5.17e-11	1.13e-10
AC022413.1	0.12962	0.416863	1.68529	4.99e-16	1.73e-15
ZNF75A	0.636842	1.45073	1.18777	6.3e-20	3.58e-19
BCR	2.06777	4.17498	1.0137	3.4e-19	1.73e-18
ADAMTS13	5.10975	1.12056	-2.18903	5.33e-28	6.44e-26
MIOX	0.0253075	0.730526	4.8513	1.25e-11	2.88e-11
LINC01004	0.201823	0.842962	2.06238	2.09e-22	1.87e-21
ABCG1	1.2407	2.88857	1.2192	6.94e-05	9.6e-05
AC110285.7	0.11787	0.732615	2.63586	4.2e-20	2.45e-19
PKIA	0.0412421	0.315369	2.93485	0.00402415	0.00489196
FAM99B	3.77454	1.80727	-1.06249	1.03e-14	3.11e-14
AC025171.1	0.228371	0.706025	1.62834	1.05e-12	2.64e-12
SH3RF3	0.314384	1.18637	1.91595	0.000131646	0.000177966
DNAJB11	6.5939	18.7929	1.51099	1e-28	3.64e-26
ARID3B	0.333668	0.778377	1.22206	8.1e-13	2.06e-12
TBC1D10B	1.85341	4.08215	1.13915	1.37e-23	1.67e-22
LINC00921	0.1322	0.383989	1.53834	3.73e-20	2.19e-19
AC112236.2	0.134783	0.381761	1.50203	4.64e-12	1.1e-11
KLHL22	1.8795	3.8977	1.05227	1.14e-20	7.36e-20
LINC01311	0.0645253	0.458009	2.82744	1.33e-26	5.38e-25
AC004801.6	0.0900685	0.239353	1.41005	5.78e-13	1.49e-12
KLHL29	0.334031	0.969928	1.53789	7.46e-07	1.19e-06
AC104534.1	0.124183	0.870038	2.80861	5.88e-11	1.28e-10
HYLS1	0.797749	1.63116	1.0319	4.03e-14	1.15e-13
TIMM17A	10.6332	21.9807	1.04766	1.27e-19	6.88e-19
FAM111A-DT	0.273121	0.698282	1.35427	7.48e-17	2.84e-16
TNNC2	0.168082	0.416687	1.3098	2.51e-07	4.15e-07
EIF4ENIF1	1.36504	2.83381	1.0538	4.54e-21	3.16e-20
E2F1	0.445127	9.10147	4.35381	1.32e-27	1.12e-25
RPL35	122.57	247.153	1.0118	1.26e-10	2.67e-10
CRLF2	0.0177847	0.331638	4.2209	1.05e-06	1.67e-06
VEGFD	0.26625	2.45003	3.20195	1.79e-06	2.79e-06
IGSF8	20.916	47.5928	1.18613	7.42e-14	2.07e-13
AL139246.3	0.0868435	0.382648	2.13953	8.13e-14	2.26e-13
CERS5	1.17485	2.86992	1.28853	3.19e-23	3.51e-22
BSN	0.0710345	0.266193	1.90588	1.82e-11	4.13e-11
ALDH2	154.926	71.3477	-1.11864	1.47e-22	1.37e-21
LINC01355	0.107445	0.424661	1.98271	3.24e-18	1.44e-17
TOMM40L	2.07515	10.6415	2.35842	4.12e-30	1.4e-26
CARNS1	0.11818	0.434684	1.87899	0.0083197	0.00986095
CRHBP	20.1678	1.27747	-3.98069	4.23e-28	5.91e-26
PLEKHH1	0.099748	0.425451	2.09263	5.67e-19	2.79e-18
MOB3A	2.54131	5.2768	1.05409	9.11e-17	3.43e-16
C19orf48	4.21521	16.8552	1.99952	1.63e-24	2.62e-23
HAO2	86.8434	25.3486	-1.77651	1.58e-20	9.91e-20
ZDHHC11B	0.34316	0.844389	1.29903	0.000836432	0.00106907
MEX3A	0.189042	1.22362	2.69438	7.86e-21	5.22e-20
PLEKHA8P1	0.378215	1.0834	1.51829	2.41e-20	1.47e-19
ISG20L2	2.85381	6.79038	1.2506	1.85e-24	2.91e-23
S100A12	1.31808	0.257472	-2.35595	4.41e-17	1.72e-16
NFXL1	0.812971	1.88081	1.21008	9.98e-15	3.02e-14
ATP7A	0.326355	0.658971	1.01377	2.02e-09	3.9e-09
ATAD5	0.0927481	0.489554	2.40008	2.75e-23	3.08e-22
C15orf41	0.326947	1.00647	1.62217	6.65e-23	6.72e-22
IDO1	0.444307	1.2139	1.45002	0.000360873	0.000473502
L3MBTL1	0.0605114	0.262009	2.11434	3.56e-20	2.1e-19
DGCR2	7.98615	17.7748	1.15426	1.1e-21	8.62e-21
AC000123.1	0.433409	0.95974	1.14691	1.65e-12	4.09e-12
SLC7A1	0.447873	1.43318	1.67806	2.47e-05	3.53e-05
ZNF224	0.398885	0.878781	1.13953	5.65e-17	2.17e-16
HNRNPA1P10	0.0765155	0.276466	1.85328	4.64e-14	1.32e-13
RPL23P2	0.276281	0.624233	1.17595	6.3e-12	1.48e-11
MED10	4.79071	9.81446	1.03467	4.81e-19	2.39e-18
PLAG1	0.0634407	0.342975	2.43462	7.71e-09	1.42e-08
HSD17B7	2.15274	4.93936	1.19815	2.15e-14	6.33e-14
MATN3	0.0223659	1.43606	6.00468	6.75e-14	1.89e-13
HID1	0.76445	2.69094	1.81562	5.88e-05	8.17e-05
EGR3	0.732134	0.262271	-1.48105	3.08e-13	8.12e-13
AL391244.3	0.351646	1.04979	1.5779	1.31e-20	8.37e-20
RAB30-AS1	1.13012	2.47868	1.1331	2.14e-18	9.76e-18
UNC5A	0.0195274	0.260799	3.73936	2.46e-12	6.01e-12
SNORD46	0.192942	0.501587	1.37834	5.39e-07	8.72e-07
ZFP64	0.798843	1.8183	1.18661	8.81e-22	7.02e-21
GLB1L	0.87856	2.2604	1.36337	1e-13	2.76e-13
AC084036.1	1.12805	3.56544	1.66025	4.51e-16	1.57e-15
AC020765.2	0.257708	0.923857	1.84193	4.11e-19	2.07e-18
AC245140.2	0.177856	0.448574	1.33464	1.4e-18	6.53e-18
AP003119.1	0.195245	0.959531	2.29704	3.04e-09	5.77e-09
AC004980.1	0.182292	0.420801	1.20688	5.61e-18	2.44e-17
LYAR	2.48929	5.00143	1.0066	3.83e-16	1.34e-15
AC124947.2	0.340784	1.41209	2.0509	4.14e-12	9.89e-12
SMCR8	0.947151	2.17785	1.20124	5.8e-15	1.79e-14
NTAN1P2	0.268448	0.580247	1.11202	3.01e-11	6.72e-11
AACS	0.313285	1.0379	1.72812	1.45e-19	7.83e-19
ZWINT	0.862961	7.93388	3.20066	6.28e-26	1.76e-24
MPP3	0.0930328	0.591675	2.66899	5.11e-15	1.59e-14
TTC23	1.24372	2.67991	1.10752	1.36e-17	5.66e-17
AC005840.1	0.168494	0.423086	1.32826	1.22e-08	2.22e-08
GTPBP2	2.54374	7.99454	1.65207	1.94e-22	1.76e-21
ZNF414	1.68871	3.69094	1.12807	5.4e-23	5.61e-22
SLC29A1	13.7252	36.7949	1.42268	1.18e-13	3.24e-13
TMEM106C	4.42913	19.8351	2.16296	4.19e-26	1.3e-24
TMEM165	1.59206	3.96962	1.3181	9.9e-18	4.18e-17
BRPF3	3.05305	6.83434	1.16255	4.47e-13	1.16e-12
POU5F1	0.115606	0.753411	2.70423	3.69e-18	1.64e-17
CCDC196	1.03723	0.385744	-1.42703	9.97e-18	4.21e-17
SETMAR	1.24191	2.50243	1.01077	2.63e-19	1.36e-18
DERL3	0.728211	2.57193	1.82042	1.25e-06	1.98e-06
LGI4	0.47813	1.22388	1.35599	0.00256092	0.00316436
AC090587.1	0.486699	1.00929	1.05224	4.96e-08	8.63e-08
AL117328.1	0.0980088	0.405716	2.04949	5.83e-09	1.09e-08
APOO	5.21118	10.5217	1.01368	6.34e-19	3.1e-18
AC138956.2	0.160988	0.381615	1.24516	0.000376922	0.000493667
CLDN5	3.21444	6.67209	1.05357	0.004286	0.00519891
POLR3A	1.14831	2.37279	1.04707	7.34e-23	7.33e-22
GTF2IP4	0.475516	1.49293	1.65058	6.27e-17	2.4e-16
TMEM74B	0.493779	2.13164	2.11003	4.37e-12	1.04e-11
EIF2B4	3.15471	6.51463	1.04617	1.32e-25	3.19e-24
MKLN1-AS	0.16669	0.496122	1.57353	7.04e-15	2.16e-14
SMARCC1	3.6408	8.21394	1.17382	2.88e-19	1.48e-18
CCDC191	0.214346	0.559091	1.38314	1.93e-15	6.28e-15
AP002954.1	0.398372	0.182595	-1.12547	6.56e-08	1.13e-07
DMPK	0.874301	2.44274	1.4823	4.4e-17	1.71e-16
AC243964.2	0.765912	1.81137	1.24183	1.96e-06	3.04e-06
AC022144.1	0.523767	1.21803	1.21756	0.000648466	0.000834836
FBLIM1	1.47921	6.1104	2.04644	2.28e-14	6.69e-14
AC003072.1	0.390749	1.27609	1.70741	9.85e-19	4.7e-18
CANT1	4.13245	10.6656	1.36789	6.59e-25	1.21e-23
AC112219.2	0.0512417	0.220987	2.10857	3.27e-09	6.19e-09
AC093249.6	0.218891	0.632028	1.52977	4.93e-18	2.16e-17
PRR34-AS1	0.935418	3.42808	1.87372	2.02e-13	5.42e-13
ZNF93	0.0971066	0.372345	1.939	3.74e-07	6.11e-07
RAD51B	0.125924	0.258468	1.03744	2.19e-13	5.87e-13
AL449212.1	0.138073	0.54618	1.98395	1.07e-14	3.24e-14
RPS6KA4	2.84689	6.36742	1.16132	1.89e-22	1.72e-21
DMWD	1.23178	2.9047	1.23765	1.66e-25	3.87e-24
AL359513.1	0.120214	0.575208	2.25848	4.98e-17	1.93e-16
GADD45B	138	53.0755	-1.37855	6.51e-15	2.01e-14
SSTR5-AS1	0.00984905	1.46174	7.21348	0.000309386	0.000407902
CXCL14	15.118	2.26107	-2.74119	1.09e-26	4.61e-25
CDKL5	0.229213	0.481422	1.07061	4.78e-07	7.76e-07
AC053503.5	0.150261	0.331885	1.14321	2.75e-06	4.22e-06
RPL24P8	0.309258	0.739832	1.25839	2.88e-08	5.09e-08
GNB5	1.29655	3.03338	1.22624	1.71e-13	4.63e-13
Z83843.1	0.158435	0.390199	1.30032	1.36e-10	2.88e-10
U2AF2	11.6929	25.1381	1.10424	8.95e-25	1.56e-23
TMEM178B	0.0231104	0.240499	3.37942	1.52e-06	2.38e-06
DNMT1	1.16859	4.38021	1.90623	7.5e-21	5e-20
ACLY	5.90573	19.5796	1.72916	4.16e-25	8.13e-24
BHLHA15	0.62165	1.87217	1.59054	0.00037197	0.000487562
AC114786.2	0.0082811	0.771284	6.5413	7.04e-08	1.21e-07
SPTBN5	0.0912655	0.223814	1.29416	8.6e-09	1.58e-08
OLFML2A	0.200474	1.69385	3.07882	5.51e-25	1.04e-23
SNHG6	11.7009	45.5376	1.96044	3.16e-21	2.27e-20
MIR583HG	0.0814838	0.227356	1.48037	8.12e-09	1.5e-08
JMJD6	1.87365	4.029	1.10457	4.13e-17	1.62e-16
HIST2H2BE	2.74185	6.565	1.25965	5.03e-07	8.15e-07
ATXN7L2	0.251543	0.784624	1.64119	5.59e-24	7.57e-23
SNHG26	0.109555	0.276424	1.33523	1.74e-05	2.51e-05
LHX3	0.0150222	0.295674	4.29884	0.00506621	0.00610315
CCL15	5.27179	11.7892	1.1611	7.47e-13	1.91e-12
TBL2	3.32741	6.98827	1.07054	1.67e-24	2.67e-23
CYTOR	0.722748	4.13073	2.51483	8.43e-21	5.56e-20
BOLA2B	0.0765403	0.378705	2.30678	4.48e-22	3.79e-21
FITM1	3.78156	1.32618	-1.5117	1.39e-20	8.83e-20
OLFML2B	0.233263	3.5322	3.92054	2.35e-27	1.66e-25
BMP8B	0.160605	0.701092	2.12609	0.00492236	0.00593801
PARP10	9.33922	18.7743	1.00738	2.13e-13	5.72e-13
SMAD2	0.589431	1.22401	1.05422	5.27e-22	4.4e-21
PPP1R14BP3	7.41685	20.4503	1.46325	4.72e-18	2.07e-17
C11orf80	0.400239	1.52666	1.93145	9.12e-19	4.37e-18
PUS7	1.07383	2.76489	1.36445	4.45e-19	2.22e-18
AC145343.1	0.145612	0.786465	2.43326	5.73e-18	2.49e-17
FAIM	0.777831	2.06236	1.40677	3.08e-17	1.23e-16
AP006621.2	0.24696	1.60935	2.70413	1.54e-16	5.66e-16
PPP2R1A	12.9244	28.2329	1.12728	1.92e-24	3.01e-23
MAFA-AS1	0.00171366	1.76214	10.006	1.91e-13	5.13e-13
BOP1	4.701	22.3174	2.24713	2.38e-26	8.43e-25
CHAF1A	0.945412	4.26635	2.17399	5.69e-27	2.91e-25
XPO5	1.44734	4.49884	1.63615	6.09e-27	3.03e-25
ABRAXAS1	0.205013	0.45003	1.1343	1.78e-13	4.79e-13
MAEL	0.0396049	1.12523	4.8284	1.26e-05	1.83e-05
AP000240.1	0.213293	0.639438	1.58397	1.17e-09	2.3e-09
BMP5	0.603971	0.182539	-1.72627	2.06e-21	1.53e-20
FBP1	394.353	138.913	-1.5053	4.76e-21	3.3e-20
SERHL2	0.180352	0.629593	1.80361	1.05e-05	1.54e-05
CDK7	2.66156	6.09676	1.19577	4.38e-25	8.52e-24
PPP4R1L	0.105285	0.213867	1.02241	3.74e-05	5.28e-05
AL356356.1	0.198071	0.401982	1.02111	1.03e-05	1.52e-05
TCEAL8	11.4626	24.1541	1.07533	0.000127126	0.000171954
ZNF43	0.126003	0.532729	2.07994	8.02e-08	1.37e-07
SNORD72	0.100548	0.316555	1.65458	7.62e-05	0.000104865
IPO13	3.0137	6.52722	1.11493	2.32e-24	3.52e-23
HARS2	3.38037	7.98116	1.23942	8.15e-27	3.72e-25
EXO5	0.798757	1.68366	1.07577	1.53e-16	5.61e-16
BICRA	0.694265	1.64496	1.24449	5.04e-25	9.6e-24
MYRF	1.74889	6.26246	1.84029	5.26e-15	1.63e-14
CHCHD3P3	0.0937026	0.221925	1.24391	9.02e-10	1.79e-09
SLC25A51	0.712241	1.49999	1.07452	2.15e-17	8.72e-17
PDCD5	7.97198	22.0149	1.46547	8.05e-27	3.68e-25
TMX2P1	0.592437	1.2304	1.0544	2.51e-07	4.15e-07
SRCIN1	0.536838	1.13478	1.07985	1.49e-07	2.5e-07
AC073534.1	0.11566	0.26507	1.19648	2.48e-05	3.56e-05
SNRPF	5.95258	12.5404	1.075	1.41e-17	5.83e-17
ANXA5	28.4599	59.5752	1.06578	6.91e-09	1.28e-08
WDR46	6.32958	16.2675	1.36181	4.65e-26	1.4e-24
FAM104A	1.70227	3.46679	1.02614	6.6e-21	4.46e-20
ZNF341	0.320505	1.13732	1.82722	5.63e-28	6.61e-26
NAV3	0.0789865	0.61757	2.96692	1.21e-05	1.78e-05
CSAG1	0.134954	4.6769	5.11501	1.67e-09	3.25e-09
AKAP17A	3.87907	8.3182	1.10056	1.41e-19	7.58e-19
CCDC183-AS1	0.20002	0.50839	1.34579	1.07e-09	2.11e-09
PTHLH	0.181259	1.26464	2.8026	2.49e-05	3.57e-05
AL132657.1	0.0995358	0.217472	1.12754	8.19e-06	1.21e-05
AC008115.4	0.149422	0.316579	1.08317	1.4e-08	2.53e-08
ALPI	0.00891137	4.61853	9.01757	4.57e-07	7.43e-07
STAG3L2	0.290852	0.774158	1.41234	5.61e-18	2.44e-17
DLGAP4	2.91132	7.00879	1.26749	8.6e-22	6.87e-21
LINC01151	0.419654	2.83789	2.75754	1.2e-06	1.9e-06
APBB3	1.57647	3.95311	1.32629	1.99e-16	7.23e-16
EFNA3	0.247446	1.70368	2.78347	3.03e-22	2.64e-21
AP000593.3	0.0234597	1.49666	5.99541	1.27e-10	2.69e-10
AC007220.1	0.11588	0.283421	1.29031	0.00380384	0.00463427
MED27	2.04194	4.62703	1.18015	3.88e-23	4.15e-22
ADRA2C	0.181332	2.96443	4.03105	7.92e-12	1.85e-11
SPATA33	0.280025	0.629543	1.16875	1.49e-19	8e-19
SLC9A6	1.3477	2.7784	1.04376	2.17e-17	8.8e-17
YBEY	3.40617	6.95151	1.02918	5.34e-14	1.52e-13
AC020915.3	0.384038	1.19314	1.63544	1.47e-22	1.37e-21
ZNF398	0.894801	1.93377	1.11178	2.58e-23	2.92e-22
FAM222B	1.98126	3.97778	1.00555	1.21e-15	4.01e-15
KAAG1	0.0990844	0.580209	2.54984	3.15e-05	4.47e-05
AC040173.1	0.0226129	0.296362	3.71214	0.000798501	0.001022
AC132008.1	0.120415	0.280978	1.22245	0.000595967	0.000769445
MIR219A1	0.0969535	0.234905	1.27671	0.000169564	0.000227458
CRYBB2P1	0.455203	1.07556	1.24051	1.06e-14	3.19e-14
MCRIP1	9.05	23.2034	1.35835	4.89e-16	1.69e-15
TALDO1	32.7622	72.1012	1.13799	2.81e-18	1.26e-17
LINC01426	0.0743234	0.835773	3.49122	8.19e-12	1.91e-11
MEP1B	0.558456	0.218087	-1.35654	9.43e-15	2.86e-14
AC016924.1	0.216917	0.698085	1.68626	1.37e-09	2.69e-09
BCAT1	0.130236	0.71781	2.46247	4.83e-17	1.87e-16
LINC00622	0.0516851	0.257883	2.3189	3.22e-15	1.02e-14
AIFM2	3.50635	9.47217	1.43372	4.82e-21	3.34e-20
AP1S1	14.2827	33.322	1.22221	4.1e-25	8.04e-24
HSPBAP1	0.506935	1.06495	1.07091	2.84e-18	1.28e-17
AC012618.1	0.118111	0.285112	1.27138	6.13e-08	1.06e-07
STXBP6	0.31486	1.58963	2.3359	1.06e-20	6.9e-20
SSRP1	7.62769	15.4099	1.01453	3.35e-21	2.39e-20
TNFRSF18	0.229588	1.35552	2.56173	9.11e-14	2.52e-13
CD200	0.204828	1.16873	2.51246	6.38e-22	5.24e-21
AP002761.4	0.174445	0.7592	2.1217	7.92e-12	1.85e-11
GON4L	0.741792	1.97173	1.41038	1.02e-21	7.99e-21
PRAF2	2.93199	6.87108	1.22866	1.43e-18	6.66e-18
RPL7P47	0.129511	0.31367	1.27617	5.86e-07	9.45e-07
ZNF862	0.340863	1.02947	1.59463	1.52e-19	8.17e-19
AC105118.1	0.00175224	1.49914	9.74072	3.38e-13	8.89e-13
ASPDH	50.2994	23.9143	-1.07267	7.62e-16	2.58e-15
UNK	1.59537	4.1842	1.39106	3.26e-24	4.71e-23
ADGRG2	0.141236	0.626998	2.15035	0.00537246	0.00646136
COX20	0.805694	1.69009	1.0688	1.04e-15	3.48e-15
KSR1	0.244067	0.650487	1.41424	2.77e-11	6.19e-11
TMCO3	1.07816	4.21487	1.96692	3.29e-20	1.96e-19
AC010343.1	0.600767	1.50786	1.32763	1.39e-10	2.93e-10
RPS28	59.871	127.828	1.09427	1.88e-14	5.58e-14
RNU6-611P	0.0544478	0.261719	2.26507	8.32e-07	1.33e-06
PYCR3	2.9301	9.07281	1.6306	9.42e-25	1.63e-23
PMF1-BGLAP	0.634008	1.51027	1.25223	2.02e-12	4.97e-12
NAP1L1P1	0.119343	0.246828	1.0484	1.23e-09	2.41e-09
APC2	0.0737501	0.244274	1.72778	1.02e-18	4.84e-18
AL080317.2	0.0790169	0.28414	1.84637	2.21e-14	6.5e-14
AAGAB	3.39725	7.18638	1.0809	2.47e-24	3.71e-23
ARMC2	0.117719	0.282	1.26035	6.12e-18	2.65e-17
CCT6P3	0.219556	0.483151	1.13788	5.82e-14	1.64e-13
TMEM168	0.960422	2.11249	1.13721	3.84e-17	1.51e-16
MAGI2-AS3	1.5641	0.758725	-1.04369	1.16e-13	3.18e-13
ZNF283	0.133062	0.317634	1.25527	7.06e-11	1.53e-10
BAHCC1	0.375517	0.99176	1.40111	2.02e-13	5.42e-13
AL022328.2	0.734639	2.09902	1.5146	6.21e-17	2.38e-16
AC137723.2	2.33934	1.16102	-1.0107	1.95e-12	4.81e-12
PLA2G1B	0.358601	2.76657	2.94765	2.58e-09	4.92e-09
DOK7	0.19953	0.858689	2.10553	0.000366839	0.000481065
ACYP1	0.435833	1.54183	1.8228	4.19e-26	1.3e-24
TRIM32	1.01845	2.21478	1.12078	2.2e-17	8.89e-17
MRPS21	16.3562	48.2338	1.56021	2.44e-26	8.6e-25
MLANA	0.0704234	1.05506	3.90513	0.00259223	0.00320162
HIST1H3B	0.057125	0.841932	3.88151	5.27e-18	2.3e-17
TMEM201	0.405313	1.64169	2.01807	6.33e-27	3.1e-25
IFI30	0.202643	0.441461	1.12335	1.11e-08	2.02e-08
AC007996.1	0.225625	0.713521	1.66103	1.58e-15	5.18e-15
TOX2	0.966056	2.35505	1.28558	0.000500424	0.000649458
KIAA1522	2.92772	13.4957	2.20465	2.91e-24	4.27e-23
NQO1	1.45967	57.9538	5.31119	6.82e-16	2.33e-15
P4HA2	1.00816	4.30351	2.09379	1.64e-22	1.51e-21
ARHGEF1	3.6133	7.50889	1.05528	1.45e-20	9.22e-20
SYP	0.0911636	0.489053	2.42346	3.99e-20	2.33e-19
STK36	0.772328	1.93449	1.32466	8.75e-20	4.86e-19
NKIRAS2	3.30535	7.45248	1.17292	3.26e-26	1.08e-24
PLG	396.39	178.506	-1.15095	1.74e-19	9.27e-19
FAM222A	0.776484	4.14387	2.41595	5.08e-22	4.26e-21
LILRA2	0.463319	0.184707	-1.32677	4.37e-15	1.37e-14
MFF	3.83953	7.82035	1.0263	2.48e-25	5.39e-24
AC114488.1	0.051489	0.320403	2.63755	8.24e-05	0.000113129
IKZF4	0.229685	0.468629	1.02879	1.12e-12	2.81e-12
RNF157-AS1	0.0352376	0.352894	3.32405	4.31e-09	8.09e-09
NDUFB9	37.2219	92.1865	1.30841	5.07e-20	2.92e-19
ITPKA	0.460225	4.39351	3.25496	5.55e-18	2.42e-17
COL4A1	5.14969	28.0602	2.44597	1.76e-22	1.62e-21
MBL2	53.5533	22.1774	-1.27189	7.42e-14	2.07e-13
LINC01521	0.10253	0.284007	1.46988	2.92e-09	5.55e-09
ZNF761	0.627789	1.8367	1.54876	9.77e-13	2.46e-12
KCNJ11	0.196916	1.06906	2.44069	1.13e-09	2.23e-09
PSEN2	3.20888	6.94867	1.11467	2.86e-15	9.14e-15
MSMB	0.125098	1.15285	3.20407	9.23e-05	0.000126374
LINC00896	0.0944822	0.652229	2.78726	7.72e-11	1.67e-10
NOL12	0.316306	1.10414	1.80353	3e-27	1.9e-25
WDR88	0.100473	0.335333	1.73878	5.83e-17	2.24e-16
SAMD4B	3.22392	7.91189	1.29521	4.66e-27	2.55e-25
PLEKHF2	2.69712	5.82823	1.11164	1.93e-18	8.85e-18
ZNF608	0.441027	0.936022	1.08567	9.85e-06	1.45e-05
SULT1C2	0.11845	2.29517	4.27625	5.02e-13	1.3e-12
CCNT2-AS1	0.167782	0.494619	1.55973	4.52e-18	1.99e-17
POLR1C	3.35005	6.97879	1.05879	2.33e-21	1.71e-20
SRRM3	0.0347985	0.697314	4.32471	1.09e-09	2.15e-09
CA4	0.0420767	0.569383	3.7583	5.34e-07	8.64e-07
RPSAP54	0.117916	0.258598	1.13295	3.84e-07	6.27e-07
SLC39A13	2.81565	7.16335	1.34717	4.3e-26	1.32e-24
BCL7C	3.13275	6.89632	1.1384	3.77e-18	1.67e-17
FXYD1	21.9865	8.87599	-1.30864	2.02e-16	7.3e-16
PBXIP1	15.9358	33.0044	1.05038	1.89e-20	1.17e-19
KLC2	0.778701	2.79781	1.84515	8.67e-24	1.11e-22
AC090921.1	0.0075959	0.448915	5.88508	2.25e-05	3.24e-05
IFT140	0.447642	1.02831	1.19985	1e-13	2.76e-13
COL15A1	0.178547	3.84237	4.42762	1.69e-28	4.39e-26
ZNF385A	2.20167	4.5744	1.05499	1.71e-06	2.66e-06
PTP4A2P1	0.338204	0.970328	1.52058	1.06e-11	2.45e-11
AC025682.1	0.129665	0.307053	1.2437	3.4e-14	9.8e-14
SLC12A9	1.67887	4.08583	1.28314	7e-21	4.7e-20
AC005523.1	0.156867	0.355087	1.17864	0.000499156	0.000647863
DRG1	11.0357	22.3844	1.02032	3.39e-24	4.87e-23
RNY1P16	0.0849257	0.278984	1.71591	0.000348421	0.000457667
ENTPD2	0.372272	1.96584	2.40072	3.97e-12	9.49e-12
AC007066.2	0.0855699	0.294385	1.78253	9.91e-20	5.46e-19
FGF13	0.0584696	0.332095	2.50584	1.98e-09	3.82e-09
AMZ2P1	0.645079	1.3097	1.02169	2.23e-16	8.05e-16
SATB2	0.42155	1.05505	1.32353	2.76e-13	7.31e-13
ZNF543	0.291588	0.722201	1.30847	6.62e-16	2.26e-15
AL021997.2	0.0217991	0.227862	3.38582	3.99e-09	7.51e-09
SNRPB	32.9432	116.327	1.82013	1.04e-26	4.42e-25
RPL23A	51.2359	126.98	1.30938	1.11e-19	6.05e-19
CENPW	0.850714	8.48191	3.31764	8.45e-28	8.6e-26
CPD	5.46498	14.9768	1.45444	8.39e-17	3.17e-16
KLK4	0.00455927	0.938292	7.68509	0.000193244	0.000258247
AL359921.2	0.474474	1.73402	1.86972	1.1e-20	7.13e-20
NSMAF	0.85046	1.94326	1.19216	5.05e-14	1.44e-13
AC022098.3	0.0841139	0.31323	1.89681	7.99e-11	1.72e-10
PORCN	0.485817	1.50681	1.63302	4.05e-22	3.45e-21
MZT1	1.37377	3.87769	1.49705	2.37e-23	2.7e-22
AC091390.3	0.121001	0.425847	1.81532	2.59e-15	8.32e-15
SIRT6	2.38042	5.75578	1.27379	1.63e-23	1.95e-22
DKK2	0.0491759	0.262968	2.41886	9.83e-06	1.45e-05
AC009407.1	3.99109	10.4465	1.38817	3.63e-09	6.86e-09
MRPL45P2	0.251558	0.722432	1.52197	4.25e-22	3.61e-21
RRAS	10.8822	22.9867	1.07883	2.61e-12	6.35e-12
RPL37A	41.894	89.8213	1.10031	6.15e-14	1.73e-13
SNORD100	0.80798	1.74867	1.11387	2.2e-05	3.15e-05
AC064836.3	0.488655	1.08665	1.153	7.08e-10	1.42e-09
AC005046.1	0.154108	0.441008	1.51686	1.71e-10	3.59e-10
ITGAE	0.435076	1.33781	1.62054	3.57e-17	1.41e-16
SWAP70	1.57003	3.71907	1.24415	1.36e-16	5.04e-16
SPRYD3	5.62389	12.0526	1.0997	1.52e-23	1.83e-22
MFGE8	1.11166	4.09078	1.87966	1.72e-17	7.07e-17
MIR647	0.777295	3.70391	2.25252	1.09e-15	3.65e-15
PLEKHG2	0.488801	1.72885	1.82249	2.88e-21	2.08e-20
RECQL5	1.11626	3.31992	1.57247	2.11e-28	4.46e-26
KCNK9	0.00199922	0.310999	7.28133	1.11e-12	2.8e-12
ZSCAN21	1.36726	2.8338	1.05146	5.74e-21	3.92e-20
AXIN1	1.6791	3.457	1.04184	1.48e-14	4.41e-14
PNMA3	0.0900136	1.74681	4.27844	5.46e-08	9.48e-08
DUOX1	0.0569322	0.494106	3.1175	5.88e-20	3.36e-19
DNAJC9-AS1	0.072107	0.37298	2.37089	1.64e-25	3.83e-24
GPR182	1.38929	0.195413	-2.82975	2.09e-23	2.43e-22
FCN2	42.7175	2.02804	-4.39667	5.64e-29	3.28e-26
KRT20	0.0206767	4.26341	7.68786	1.81e-09	3.51e-09
CYP17A1	0.764053	22.7908	4.89864	2.78e-05	3.96e-05
SFR1	0.749321	1.72935	1.20657	2.98e-17	1.19e-16
CEP83	0.355435	0.833294	1.22924	5.35e-21	3.68e-20
RAB4B	1.38797	2.77688	1.00049	5.57e-16	1.92e-15
CASC9	0.142474	2.38074	4.06264	0.00835981	0.00990638
FLOT1	24.287	51.9629	1.0973	4.24e-21	2.97e-20
WDR45B	9.90881	20.3199	1.03611	4.09e-21	2.87e-20
COPS7B	1.63305	4.07663	1.31981	1.42e-25	3.39e-24
SMARCD1	2.80306	7.28436	1.3778	7.3e-25	1.32e-23
SNF8	5.38372	12.6392	1.23123	4.59e-26	1.38e-24
TSPAN17	2.63756	7.36873	1.48221	4.3e-26	1.32e-24
AL031666.1	0.122387	0.261703	1.09648	0.000843801	0.00107808
SKA1	0.0543936	2.01442	5.21078	1.42e-28	4.22e-26
NSD2	0.515578	1.88556	1.87073	8.67e-24	1.11e-22
BACE1-AS	0.560946	2.14949	1.93806	5.04e-25	9.6e-24
MYCN	0.0530566	1.10148	4.37577	4.27e-15	1.34e-14
AC004449.1	0.0768889	0.218736	1.50834	3.11e-05	4.41e-05
URM1	5.76156	12.3216	1.09666	3.68e-22	3.16e-21
TIMM50	3.95364	8.7516	1.14636	6.33e-27	3.1e-25
CYSTM1	13.7072	35.8953	1.38886	5.33e-22	4.44e-21
DIP2A	0.573435	1.1909	1.05435	3.81e-15	1.2e-14
ASPHD1	0.310106	3.12793	3.33438	0.000214151	0.000285432
AC112907.2	0.104413	0.535978	2.35987	1.14e-13	3.14e-13
RHBDF1	0.963785	2.63453	1.45076	1.31e-15	4.32e-15
TCFL5	1.21874	2.84397	1.22252	1.3e-21	1.01e-20
GS1-124K5.4	2.82838	6.12646	1.11508	6.67e-11	1.45e-10
AC104986.2	0.732605	2.32134	1.66385	4.04e-15	1.27e-14
PCYOX1L	0.20226	0.502817	1.31382	6.45e-11	1.4e-10
CDCA5	0.198712	3.55851	4.16252	1.6e-28	4.39e-26
AL590682.1	0.150011	0.370241	1.3034	2.23e-06	3.45e-06
LINC00839	0.0546926	0.339929	2.63582	1.31e-07	2.21e-07
MRAS	0.815606	2.61238	1.67942	3.79e-13	9.93e-13
ZNF324	0.504732	1.04001	1.04301	3.65e-23	3.94e-22
ZNF829	0.124275	0.262726	1.08002	0.00267744	0.00330368
C4orf48	0.618509	3.66477	2.56686	1.35e-10	2.86e-10
TSPAN15	1.89293	7.55902	1.99758	4.03e-11	8.91e-11
C12orf75	0.733496	5.95464	3.02115	2.07e-09	3.99e-09
C19orf57	0.169541	0.688848	2.02255	7.24e-19	3.52e-18
NUP93	0.666684	1.74697	1.38978	3.7e-24	5.28e-23
AC098934.2	0.0993822	0.614445	2.62822	1.73e-14	5.12e-14
AC008753.1	0.093859	0.237911	1.34185	5.73e-07	9.25e-07
AC093525.8	0.0791732	0.22989	1.53786	8.78e-10	1.74e-09
AL022328.1	0.317449	0.790558	1.31635	1.97e-11	4.44e-11
PIGS	1.62806	3.66152	1.16929	1.13e-14	3.4e-14
AC006213.4	0.253245	0.839264	1.72859	3.29e-10	6.73e-10
TUBA4B	0.105879	0.44765	2.07996	0.000386082	0.000505347
PIGZ	0.528483	1.7276	1.70884	5.04e-17	1.95e-16
SHROOM4	0.159741	0.358503	1.16625	7.36e-10	1.47e-09
AP001830.1	0.444157	1.55639	1.80906	3.26e-16	1.15e-15
HS6ST1	6.56113	13.302	1.01963	6.11e-10	1.23e-09
PRKCD	2.37024	6.31184	1.41303	8.94e-16	3.01e-15
RPL31P63	0.106791	0.222209	1.05713	9.92e-05	0.000135551
POLN	0.0704505	0.235704	1.74229	1.01e-11	2.35e-11
NEAT1	5.48179	12.6457	1.20593	9.87e-09	1.81e-08
UNC13B	3.43397	8.26002	1.26627	1.27e-13	3.48e-13
AC104825.1	0.409677	0.974514	1.2502	1.07e-10	2.28e-10
MIR378H	0.182574	0.512914	1.49024	0.000283132	0.000374532
ITGB5	12.3022	24.9239	1.01861	1.97e-15	6.4e-15
GPD1	36.754	17.6985	-1.05427	4.63e-13	1.2e-12
C6orf226	4.54636	10.1044	1.15219	6.21e-17	2.38e-16
BRIX1	1.94195	4.21503	1.11804	2.13e-19	1.12e-18
CABLES2	0.78442	2.44086	1.63769	4.34e-21	3.03e-20
DDX27	3.80902	8.09963	1.08844	6.49e-23	6.59e-22
C1QL4	0.00740595	0.257173	5.11791	6.76e-13	1.73e-12
RNA5SP122	0.158078	0.362689	1.1981	3.22e-05	4.57e-05
BCL7A	1.30373	2.73351	1.06811	5.76e-14	1.62e-13
MSLN	0.0885225	1.03597	3.5488	0.0053295	0.00641108
PIK3R6	0.145598	0.398593	1.45293	9.68e-13	2.44e-12
CKAP2L	0.0667714	1.05926	3.98769	1.2e-25	2.96e-24
METTL3	1.36618	3.48814	1.35231	7.37e-24	9.69e-23
ZMAT5	2.24678	4.99852	1.15364	1.92e-23	2.26e-22
SERPINI1	0.511892	3.31552	2.69532	1.52e-19	8.17e-19
DANCR	4.42438	11.7866	1.4136	4.06e-09	7.64e-09
AL031673.1	0.495194	1.84338	1.89629	2.06e-19	1.08e-18
LINC01389	0.158058	0.882603	2.48131	2.72e-18	1.22e-17
SLC1A5	2.72912	8.79615	1.68844	0.00412299	0.00500701
COA6	7.24611	26.9294	1.8939	8.51e-29	3.64e-26
AC126323.1	0.0148496	0.242811	4.03134	0.000126509	0.000171162
STX4	4.69522	10.478	1.1581	3.26e-25	6.72e-24
SMIM29	2.939	8.48834	1.53015	1.99e-23	2.33e-22
ZNF783	0.251948	0.753049	1.57962	4.69e-16	1.63e-15
AC117498.2	0.410704	1.24598	1.6011	1.77e-09	3.42e-09
CDPF1	1.63164	4.54749	1.47874	4.09e-24	5.72e-23
OTUB2	0.132488	0.605167	2.19147	2.23e-23	2.56e-22
PPIB	80.7438	173.443	1.10303	2.53e-24	3.8e-23
H1FX-AS1	0.142516	0.4706	1.72338	1.56e-18	7.24e-18
CHRNA1	0.0332923	0.345998	3.37751	0.00128868	0.00162359
ARHGAP6	0.102787	0.220809	1.10314	9.18e-07	1.46e-06
COL5A2	2.38905	7.44342	1.63953	4.06e-09	7.64e-09
AL034379.1	0.219533	0.536542	1.28925	2.58e-08	4.58e-08
AC008752.3	0.143409	0.355412	1.30935	2.41e-12	5.89e-12
RUFY2	0.432655	0.900029	1.05675	1.54e-16	5.66e-16
VCX	0.00176336	0.332464	7.55873	7.69e-09	1.42e-08
AC000123.2	0.424559	1.09748	1.37016	4.24e-16	1.48e-15
AC007938.3	0.130894	0.544968	2.05778	1.02e-07	1.74e-07
ZNF426	0.41964	0.895245	1.09313	5.9e-06	8.82e-06
PSMD4	26.6639	87.1673	1.7089	2.02e-28	4.46e-26
AC232271.1	0.0823206	0.337276	2.0346	4.71e-21	3.27e-20
SLC38A1	1.29373	4.37665	1.75829	3e-05	4.27e-05
AC022149.1	0.228633	0.524272	1.19728	2.46e-06	3.8e-06
AL009174.1	0.394949	1.12878	1.51502	2.25e-10	4.68e-10
AC115223.1	1.50462	3.52062	1.22643	2.74e-21	1.99e-20
GAPDHP1	2.89336	9.2718	1.68011	4.36e-05	6.12e-05
UBE2Z	6.26796	12.9794	1.05015	2.61e-20	1.58e-19
USP27X-AS1	0.14104	0.422241	1.58196	2.71e-09	5.16e-09
STAG3L4	0.764392	2.13092	1.4791	4.16e-19	2.09e-18
GDI1	7.5769	17.2491	1.18684	2.72e-25	5.82e-24
PUSL1	1.70598	4.5231	1.40671	7.95e-21	5.28e-20
AC006504.5	0.142122	0.376579	1.40582	1.82e-19	9.67e-19
PKP4	3.00582	6.17266	1.03813	3.85e-19	1.95e-18
LINC00205	0.289346	1.40556	2.28028	1.03e-21	8.07e-21
RHPN1	0.321521	1.91313	2.57295	2e-21	1.49e-20
LAMC1	4.31562	18.7369	2.11824	1.87e-23	2.21e-22
SYMPK	4.40777	9.2894	1.07553	7.46e-24	9.78e-23
SYPL1P2	0.0250619	0.223498	3.15669	4.4e-18	1.94e-17
AL355303.1	0.0796163	0.263993	1.72937	1.5e-09	2.92e-09
TNFSF9	0.133011	0.549739	2.0472	0.000331567	0.000436216
AURKB	0.213525	4.20118	4.29832	8.8e-28	8.85e-26
SLC18B1	2.13754	4.48095	1.06786	1.22e-10	2.59e-10
GNAL	0.117671	0.734099	2.64122	2.89e-17	1.15e-16
NEK11	0.15408	0.310766	1.01215	0.00519209	0.00624848
AC012146.1	0.325398	1.50426	2.20877	3.99e-20	2.33e-19
CRNDE	0.100084	1.61255	4.01006	7.73e-19	3.74e-18
MCF2L	0.24731	0.660687	1.41765	4.46e-16	1.55e-15
SNHG10	0.455102	1.51893	1.7388	1.56e-23	1.87e-22
AL121944.1	1.26188	2.52791	1.00237	6.35e-11	1.38e-10
CCDC43	1.80436	3.74326	1.0528	7.55e-20	4.23e-19
KANSL1	0.980903	2.04416	1.05932	3.77e-15	1.19e-14
SNHG20	0.361795	1.2887	1.83268	3.89e-24	5.5e-23
MTMR3	0.187616	0.430824	1.19931	1.84e-16	6.68e-16
PCDH12	0.990427	2.24664	1.18164	1.39e-15	4.58e-15
PPIAP31	0.149385	0.404929	1.43863	1.43e-12	3.57e-12
DCAF15	2.87464	6.36222	1.14615	4.96e-22	4.16e-21
FTH1P7	1.35932	3.24557	1.25558	2.03e-14	5.99e-14
RNF187	19.4693	51.8971	1.41445	2.75e-25	5.86e-24
ZNF124	0.212118	0.533967	1.33188	3.23e-09	6.11e-09
TNFRSF4	0.297797	2.18837	2.87745	6.79e-26	1.88e-24
MRPL53	0.70066	2.25927	1.68907	4.29e-28	5.91e-26
AC004771.1	0.102268	0.223359	1.127	2.23e-07	3.7e-07
PILRB	0.250249	0.760618	1.60381	1.11e-10	2.36e-10
CERS1	0.00711978	0.247991	5.12231	2.21e-10	4.59e-10
TBC1D7	0.747072	2.05957	1.46302	4.48e-27	2.48e-25
ADORA2A	0.190416	0.468726	1.29959	1.4e-11	3.21e-11
OLA1	3.86446	8.91597	1.20613	1.21e-22	1.16e-21
DDX49	6.55177	18.111	1.46691	1.92e-28	4.46e-26
SERPINE1	129.223	45.0428	-1.52049	2.29e-11	5.14e-11
KCNH6	0.00504894	0.247834	5.61725	1.33e-06	2.09e-06
AL645940.1	0.0905109	0.303056	1.74342	4.86e-14	1.38e-13
AC010643.1	0.0655692	0.529093	3.01243	0.000508834	0.00066027
AC005586.1	0.291505	0.867054	1.5726	8.31e-13	2.11e-12
GPANK1	3.06607	8.02157	1.38749	1.03e-24	1.76e-23
DIS3L2	0.88582	1.78744	1.01281	1.56e-26	6.03e-25
PSPC1-AS2	0.1404	0.410891	1.54921	7.62e-13	1.94e-12
APOF	180.591	34.7204	-2.37887	2.26e-26	8.16e-25
CRTC2	5.97243	14.2098	1.2505	9.65e-26	2.47e-24
TSSK6	0.293751	1.24282	2.08095	3.34e-25	6.84e-24
PTP4A3	1.16501	10.3004	3.14429	7.43e-23	7.4e-22
NME2	6.86306	19.2315	1.48655	1.71e-21	1.3e-20
PSKH1	2.60867	6.90666	1.40467	3.77e-22	3.23e-21
AC132872.1	0.521036	1.94246	1.89843	1.87e-23	2.21e-22
ADAMTS10	0.651925	2.0431	1.64798	1.02e-09	2.01e-09
CLEC2D	0.27536	0.583149	1.08255	1.19e-07	2.01e-07
AC013731.1	0.0485148	0.307916	2.66604	3.9e-20	2.28e-19
ITM2A	1.71183	4.13408	1.27202	0.0018901	0.00235518
MELTF	0.272072	1.52031	2.4823	2.19e-05	3.14e-05
TMEM14C	34.3211	72.0563	1.07003	3.47e-25	7.03e-24
EIPR1	1.53117	3.2597	1.0901	8.6e-22	6.87e-21
AC022306.2	0.302516	1.22307	2.01543	1.27e-22	1.21e-21
TRMT2B	1.4087	2.90207	1.04272	2.78e-15	8.89e-15
ADAMTS16	0.0328246	0.721386	4.45792	1.68e-05	2.43e-05
FRZB	0.835804	2.91003	1.7998	2.47e-10	5.11e-10
AC004585.1	0.11789	0.324841	1.46229	1.4e-05	2.04e-05
FBN1	0.802669	1.81433	1.17656	0.00201138	0.00250237
CASP3	4.18601	8.44081	1.01181	1.98e-17	8.03e-17
EPHA2	15.0094	5.62655	-1.41554	2.54e-13	6.75e-13
TAP1	5.83215	17.0089	1.54419	6.51e-15	2.01e-14
AC098583.1	0.566217	1.59815	1.49697	4.32e-15	1.36e-14
FBXO9	2.7997	5.99355	1.09814	1.88e-19	9.96e-19
AL133216.2	0.959115	1.95776	1.02943	1.75e-11	3.97e-11
AL445433.1	0.0991513	0.213573	1.10702	0.00147654	0.00185245
SGMS2	3.766	1.8026	-1.06295	1.68e-05	2.43e-05
ITLN1	1.54536	0.431801	-1.8395	1.9e-22	1.73e-21
YWHAZ	15.6587	38.8596	1.31131	1.22e-16	4.52e-16
HEXDC	3.12135	6.4108	1.03834	3.11e-17	1.24e-16
RRAGB	1.1993	2.58659	1.10885	2.49e-17	1e-16
SLC2A4	0.759184	1.54163	1.02193	0.00176817	0.00220819
ZNF500	0.557776	1.29618	1.21651	2.3e-25	5.05e-24
PCED1A	4.56233	12.8509	1.49403	1.15e-23	1.43e-22
AP003419.3	0.0610147	0.42556	2.80213	1.48e-16	5.45e-16
ZNF692	1.10423	5.55146	2.32983	1.38e-28	4.22e-26
CNOT9	3.30926	6.95422	1.07138	7.73e-20	4.33e-19
SPC24	0.244054	4.3305	4.14926	4.17e-28	5.91e-26
TMEM246	0.500381	1.72703	1.78719	0.00189797	0.00236463
PLEKHA8	0.297257	0.75452	1.34385	1.06e-20	6.9e-20
AGAP4	0.0988892	0.283312	1.5185	3.75e-16	1.32e-15
AL139289.2	0.143987	0.528725	1.87658	3.93e-16	1.38e-15
AC010280.1	0.480751	0.169696	-1.50234	6.12e-16	2.1e-15
ITGB1BP1	1.39157	4.05961	1.54463	1.28e-26	5.22e-25
HDAC1	9.67253	19.6969	1.026	6.77e-19	3.3e-18
ALS2CL	0.869577	3.71415	2.09465	9.11e-17	3.43e-16
DYNC1H1	4.9251	11.4234	1.21376	1.99e-23	2.33e-22
RFX3	0.155775	0.328382	1.07591	4.88e-11	1.07e-10
NR4A3	1.69537	0.540166	-1.65012	2.23e-13	5.97e-13
C7orf31	0.319215	0.804473	1.33352	2.92e-05	4.15e-05
IL34	0.832807	2.22126	1.41533	5.27e-05	7.35e-05
TRIM37	1.34741	3.16066	1.23004	5.37e-19	2.65e-18
AL162431.2	0.0397569	0.324033	3.02686	3.62e-26	1.17e-24
DYRK1B	1.93625	4.54042	1.22956	1.23e-15	4.09e-15
RPS10P2	0.139525	0.386434	1.4697	3.78e-09	7.14e-09
AC139769.1	0.0462219	0.259649	2.48991	0.00430043	0.00521566
AC093627.5	0.133287	0.339046	1.34695	4.6e-14	1.31e-13
YAE1	1.02959	2.37825	1.20783	9.14e-23	8.95e-22
AZIN2	0.124388	0.277502	1.15765	9.96e-10	1.97e-09
FUT1	0.258433	0.829111	1.68177	5.48e-10	1.1e-09
AL353622.1	0.247943	0.804718	1.69847	1.13e-14	3.4e-14
TBC1D22B	1.02165	2.74644	1.42666	2.06e-22	1.86e-21
ABCA7	0.509347	1.53305	1.58968	8.68e-16	2.93e-15
STK3	0.813235	1.75257	1.10772	1.73e-20	1.08e-19
SERPINE2	0.854661	3.33557	1.96451	0.0040752	0.00495149
UCK2	0.977231	4.97742	2.34863	2.02e-28	4.46e-26
DDX41	6.14902	15.2881	1.31398	8.75e-29	3.64e-26
IQCC	0.201898	0.904045	2.16277	6.59e-27	3.18e-25
RNU7-40P	0.225023	0.54781	1.2836	9.83e-05	0.000134336
GALNT18	2.04044	5.38116	1.39903	1.42e-07	2.39e-07
AC010245.2	0.168388	0.362419	1.10587	3.43e-13	9.02e-13
AC008915.2	0.92107	1.967	1.09462	1.56e-15	5.14e-15
CLEC4M	5.50931	0.149448	-5.20415	2.57e-30	1.4e-26
PNCK	0.00852098	0.938609	6.78336	4.66e-09	8.72e-09
RNY4P10	0.271719	1.71523	2.65822	1.7e-22	1.57e-21
RALA	4.61292	9.41317	1.029	1.37e-23	1.67e-22
AC064807.1	0.296467	0.696309	1.23185	1.3e-14	3.87e-14
AL353572.1	0.0521406	0.400705	2.94206	4.45e-06	6.72e-06
FOXN4	0.130988	1.12841	3.10678	0.00104833	0.00132881
SYTL5	0.715062	0.3548	-1.01106	9.28e-14	2.57e-13
SIGLEC15	0.186748	0.860334	2.2038	0.00657862	0.00785311
TMEM104	2.32022	6.80762	1.55289	9.56e-27	4.16e-25
CD99L2	7.48573	15.219	1.02366	1.96e-14	5.78e-14
TBX10	0.194458	0.571316	1.55483	5.63e-09	1.05e-08
ACSM3	8.26917	3.08038	-1.42463	3.51e-21	2.5e-20
ATP6V1B1	0.0385944	0.254861	2.72325	2.15e-11	4.84e-11
SMIM32	0.0769198	3.32062	5.43195	0.00121113	0.00152843
AC105206.2	0.0834122	0.228258	1.45234	3.04e-06	4.64e-06
AL356535.1	0.126851	0.296879	1.22674	0.000847741	0.0010827
AATF	4.67964	11.4749	1.29401	1.21e-26	5.05e-25
MGAT3	0.0553476	0.26915	2.28182	4.56e-12	1.08e-11
GLA	3.24193	11.3625	1.80936	1.2e-24	2.01e-23
ASNS	0.500574	2.5703	2.36028	2.43e-09	4.64e-09
ALDH6A1	64.3841	28.4973	-1.17588	9.37e-20	5.18e-19
ZNF418	0.174965	0.420357	1.26454	0.00202808	0.00252221
IGSF21	0.204941	0.571993	1.48079	9.58e-10	1.9e-09
CIART	0.664037	2.95234	2.15252	1.71e-15	5.6e-15
SLC22A10	19.9713	6.07971	-1.71585	4.33e-16	1.51e-15
AC011481.1	0.0738722	0.350238	2.24523	4.81e-17	1.87e-16
POC5	0.592259	1.51267	1.3528	1.58e-22	1.47e-21
AC124016.1	0.0692996	0.293114	2.08055	2.1e-20	1.29e-19
AC022400.5	0.102297	0.246361	1.26801	9.72e-14	2.69e-13
AC010201.2	0.0394909	0.279092	2.82115	6.85e-22	5.6e-21
MSI2	0.562666	1.43739	1.3531	5.09e-16	1.76e-15
LINC01963	0.286277	0.85375	1.5764	9.6e-15	2.91e-14
ATP8B2	0.811346	2.02551	1.3199	9.7e-08	1.65e-07
DEAF1	1.78197	4.77515	1.42207	3.47e-27	2.12e-25
WDR83	1.20341	3.0516	1.34244	2.3e-25	5.05e-24
SELENOM	2.53642	13.0616	2.36447	2.81e-07	4.63e-07
AC245100.8	1.04442	2.40393	1.20269	4.56e-12	1.08e-11
RPL35A	49.0151	108.442	1.14563	2.79e-19	1.44e-18
CXXC1	3.69854	7.80245	1.07697	1.31e-23	1.6e-22
LPL	0.14158	1.10297	2.9617	1.86e-21	1.39e-20
PRPF3	2.06021	6.60536	1.68085	8.37e-27	3.76e-25
CCDC93	0.826785	2.62686	1.66776	1.15e-24	1.95e-23
AL139011.1	0.321909	0.851358	1.40311	2.21e-18	1.01e-17
DPH7	0.982727	2.99705	1.60868	9.78e-26	2.5e-24
AL450405.1	5.27928	12.4733	1.24043	7.78e-05	0.000106926
KCTD2	2.27062	5.03328	1.14841	4.05e-23	4.32e-22
CD109	0.17295	1.53839	3.15299	4.03e-16	1.41e-15
ZNF888	0.0811072	0.315869	1.96143	0.00161817	0.00202617
AC004263.1	0.035277	0.247782	2.81227	4.87e-18	2.13e-17
OTUD6B	0.878277	2.37391	1.43452	3.81e-21	2.69e-20
AC006435.2	0.0758059	0.265306	1.80728	1.63e-11	3.7e-11
AC006111.2	0.105924	0.302045	1.51173	2.62e-08	4.65e-08
AP001767.3	0.072473	0.331307	2.19265	1.73e-13	4.68e-13
SLC39A6	3.78392	8.03325	1.0861	3.47e-11	7.71e-11
AC124067.2	0.03227	0.247172	2.93725	3.99e-11	8.82e-11
RNF216	2.13389	4.84349	1.18256	6.26e-23	6.37e-22
PIP4P1	2.84432	6.38291	1.16613	5.73e-26	1.65e-24
AC005154.2	0.0728673	0.24264	1.73547	1.6e-13	4.35e-13
AC087741.1	0.18484	0.716305	1.9543	6.13e-19	3.01e-18
NAA40	0.680152	2.38312	1.80892	2.77e-24	4.09e-23
GSK3A	5.43338	11.2264	1.04697	3.48e-26	1.13e-24
RNU6-322P	0.239918	0.628993	1.3905	3.64e-06	5.53e-06
ZFAT	0.359106	0.926882	1.36798	7.19e-24	9.48e-23
WRAP53	0.745378	1.55234	1.0584	1e-17	4.22e-17
AC005005.3	0.0674937	0.241105	1.83684	3.51e-12	8.46e-12
GPR161	0.0790885	0.275967	1.80295	8.66e-11	1.86e-10
COX7B2	0.00789172	7.37646	9.86837	6.87e-10	1.37e-09
VPS50	0.703259	1.44935	1.04328	2.69e-19	1.39e-18
TMEM81	0.796978	2.59169	1.70128	7.84e-27	3.59e-25
NKAPP1	0.133364	0.27498	1.04396	2.52e-16	9.06e-16
SHCBP1	0.0610749	1.03558	4.08371	1.24e-25	3.03e-24
EPRS	6.85059	18.7746	1.45448	1.37e-25	3.29e-24
ZRANB2	3.60206	7.62092	1.08114	1.93e-19	1.02e-18
ARHGEF17	0.89734	1.84756	1.0419	5.08e-05	7.09e-05
UPK1A-AS1	0.0200683	0.343395	4.09688	6.26e-07	1.01e-06
REXO4	4.6334	10.7555	1.21492	7.3e-25	1.32e-23
ACADS	72.1009	32.0587	-1.1693	9.35e-22	7.4e-21
AL512353.1	0.195339	0.483571	1.30775	7.35e-05	0.000101304
RBM12B-AS1	0.0839664	0.278426	1.72941	7.97e-12	1.86e-11
BBOX1-AS1	0.00575909	0.319212	5.79253	1.77e-09	3.44e-09
AFAP1	0.364087	0.977677	1.42507	6.62e-07	1.06e-06
SNRPGP4	0.0868159	0.241413	1.47547	0.00555287	0.00666728
AC131009.1	0.124192	0.502793	2.01739	1.29e-13	3.53e-13
ECE2	1.21205	2.49543	1.04184	4.68e-17	1.82e-16
AC112206.2	2.48398	1.19277	-1.05833	3.7e-12	8.88e-12
RNF181	34.7548	70.2932	1.01617	2.5e-20	1.52e-19
CHD1L	7.14577	18.3224	1.35844	2.88e-21	2.08e-20
RAI1	0.796694	1.69547	1.08958	5.46e-09	1.02e-08
AL360181.4	0.18638	0.501178	1.42707	0.00236978	0.00293492
AC110995.1	0.43644	0.214717	-1.02335	1.29e-11	2.97e-11
ZNF572	0.149443	0.638307	2.09465	2.09e-20	1.29e-19
VPREB3	0.555301	1.20093	1.11281	0.00624452	0.00746657
ALOX12-AS1	0.303181	0.700931	1.20909	1.42e-20	9.02e-20
ALYREF	9.90806	27.7331	1.48494	2.33e-21	1.71e-20
AC008897.3	0.359835	0.798302	1.1496	3.34e-05	4.73e-05
THOC1	0.940132	2.0347	1.11388	1.09e-20	7.05e-20
PLCB3	1.63426	3.84668	1.23498	1.86e-21	1.39e-20
ASH1L	1.37855	3.18843	1.20969	1.22e-12	3.06e-12
CYCS	12.6231	25.3376	1.00522	1.71e-15	5.6e-15
PSME3	6.09984	13.7166	1.16909	7.1e-24	9.38e-23
LYPD8	0.0123539	0.650358	5.71819	7.81e-14	2.17e-13
AP3B1	2.0667	4.9461	1.25896	2.8e-24	4.13e-23
RAD51-AS1	0.343281	1.05652	1.62186	7.47e-20	4.19e-19
ADPRHL1	0.552619	1.46414	1.40569	1.18e-05	1.73e-05
AL360181.2	0.334574	0.846639	1.33942	5.23e-10	1.05e-09
MRTFA	1.76754	4.0436	1.1939	3.47e-23	3.78e-22
GOLGA8A	0.201988	1.03848	2.36214	5.34e-14	1.52e-13
TRIM52	0.405804	1.08798	1.4228	9.46e-22	7.48e-21
LINC02241	0.000425954	0.888621	11.0267	1.28e-12	3.2e-12
PAQR9	2.69556	5.96844	1.14677	5.11e-10	1.03e-09
RUVBL2	9.66941	21.5972	1.15935	4.49e-25	8.68e-24
KCNN2	3.18181	0.445561	-2.83615	2.96e-23	3.29e-22
WDYHV1	1.31746	4.4908	1.76921	3.34e-24	4.82e-23
AP003733.4	0.198893	0.435593	1.13099	3.06e-10	6.28e-10
AL391422.4	1.19327	2.5075	1.07133	1.53e-11	3.48e-11
EIF3H	11.3543	27.1923	1.25996	1.17e-21	9.13e-21
PSMD14	2.98111	6.87376	1.20525	1.99e-24	3.1e-23
ATG4B	3.06116	6.37711	1.05882	4.52e-24	6.24e-23
NEU1	7.53753	26.6668	1.82288	3.4e-28	5.25e-26
ZNF624	0.144241	0.320762	1.15302	2.99e-11	6.66e-11
PLOD3	7.49515	23.5893	1.6541	6.33e-27	3.1e-25
TCEAL1	3.85559	7.93682	1.04161	4.67e-13	1.22e-12
RASGRF2	0.112592	0.63627	2.49854	7.64e-26	2.05e-24
TPR	2.83778	7.19246	1.34172	9.8e-20	5.41e-19
AL606834.2	0.248644	0.546938	1.1373	3.85e-11	8.53e-11
ATG16L2	0.738395	1.50266	1.02505	2e-13	5.38e-13
SMC2	0.700184	2.19551	1.64875	1.48e-18	6.87e-18
AL590133.1	0.263267	0.760037	1.52954	9.11e-14	2.52e-13
GRK3	0.618518	1.77335	1.51959	0.000105567	0.000143796
ZBTB11-AS1	0.275846	0.674919	1.29085	1.87e-20	1.16e-19
SLC7A2	46.3749	21.3991	-1.1158	2.68e-17	1.08e-16
AC099667.1	0.245322	0.545348	1.1525	4.26e-09	8.01e-09
MIRLET7D	0.221864	0.590094	1.41127	4.92e-05	6.88e-05
AC127537.1	0.0865352	0.226044	1.38524	2.67e-11	5.97e-11
COPE	21.4908	49.7444	1.21081	2.45e-25	5.34e-24
NUP43	2.04651	4.83444	1.24018	1.43e-22	1.35e-21
AL109933.4	1.82353	0.897604	-1.02259	2.29e-10	4.76e-10
HSF2	1.06554	2.61074	1.29288	2.69e-18	1.21e-17
INS-IGF2	2.66257	0.211894	-3.65141	5.02e-30	1.4e-26
STARD3	4.37566	9.34646	1.09492	3.74e-24	5.33e-23
AC110285.6	0.0291634	0.610255	4.38718	9.06e-22	7.19e-21
AL365330.1	0.376062	0.925295	1.29894	1.51e-11	3.45e-11
RGS10	2.42087	5.73853	1.24516	4.86e-08	8.45e-08
AC099778.1	0.069633	0.272557	1.96871	6.34e-23	6.44e-22
UBN1	1.93145	4.35762	1.17386	7.86e-21	5.22e-20
TRPS1	0.195644	0.476015	1.28278	5.13e-05	7.17e-05
NME3	9.1914	22.4255	1.28679	6.38e-22	5.24e-21
AC093724.1	0.0794833	0.343601	2.11201	2.63e-11	5.89e-11
SERPINA11	258.651	92.7346	-1.47983	1.36e-20	8.65e-20
ANKRD55	0.588903	0.177533	-1.72994	6.27e-17	2.4e-16
STX1A	0.139939	0.691773	2.3055	2.1e-25	4.69e-24
CASC3	3.75706	9.34297	1.31428	3.95e-25	7.8e-24
AC079209.1	0.122702	0.4595	1.9049	0.00550343	0.00660982
LINC00893	0.0644909	0.275799	2.09645	3.46e-19	1.76e-18
C5orf34	0.0672626	0.588787	3.12987	5.7e-28	6.61e-26
NEIL3	0.0239158	0.725578	4.92309	5.92e-27	3.01e-25
CPED1	4.13589	1.54245	-1.42297	1.78e-19	9.46e-19
CLIP2	0.77103	3.02267	1.97096	5.24e-08	9.11e-08
AC016885.3	0.00535277	1.18384	7.78897	4.8e-10	9.71e-10
BNIP3P5	0.123559	0.265728	1.10475	8.35e-05	0.000114668
HIST3H2A	0.287497	3.02404	3.39486	0.00790686	0.00938647
MTA3	0.695821	1.92662	1.46928	3.56e-25	7.18e-24
FICD	1.03593	2.20596	1.09048	2.13e-15	6.89e-15
CTHRC1	0.194154	5.0299	4.69525	1.84e-21	1.38e-20
RCOR3	1.04762	2.76284	1.39903	1.74e-22	1.6e-21
USP36	1.94058	4.10516	1.08095	5.08e-19	2.52e-18
COPS6	15.177	32.6132	1.10357	3.39e-26	1.11e-24
Z84485.1	0.0800929	0.337053	2.07323	3.38e-15	1.07e-14
RAMAC	3.02034	6.59158	1.12591	1.92e-24	3.01e-23
ZNF384	0.88422	1.97681	1.16069	6.95e-13	1.78e-12
CHMP4BP1	0.146514	0.314798	1.10339	4.22e-07	6.87e-07
C18orf54	0.0599515	0.276333	2.20454	2.52e-17	1.01e-16
PPP1R14D	0.0379118	1.22407	5.01289	7.23e-13	1.85e-12
SEMA3F	1.1713	4.4342	1.92057	8.94e-30	1.66e-26
EXOSC1	2.64301	5.52134	1.06284	3.99e-24	5.6e-23
RPP30	1.76812	3.5842	1.01944	1.76e-23	2.09e-22
NT5DC3	0.63487	1.39494	1.13567	8.1e-13	2.06e-12
WIZ	2.34747	5.3043	1.17606	1.67e-24	2.67e-23
NOL8	1.11301	2.27465	1.03118	2.58e-19	1.34e-18
NCAPH2	4.85879	14.1173	1.53879	1.2e-25	2.96e-24
NOTCH4	0.962237	2.09888	1.12516	2.35e-15	7.57e-15
MROH1	0.993341	3.89242	1.97031	2.11e-26	7.72e-25
PHYHIPL	0.39434	2.63387	2.73967	5.85e-08	1.01e-07
LRRC45	3.44398	10.4838	1.60601	2.58e-20	1.57e-19
GOSR2	1.56366	3.39944	1.12037	3.01e-25	6.33e-24
TRMT13	0.845195	1.72125	1.0261	2.21e-15	7.16e-15
ELK4	2.14175	4.32998	1.01557	5e-14	1.42e-13
TMEM67	0.120013	0.293355	1.28946	1.73e-09	3.35e-09
STOX1	0.072101	0.43005	2.57641	6.27e-07	1.01e-06
PPIH	3.64874	8.95727	1.29566	2.14e-22	1.91e-21
AC008555.8	0.210721	0.552159	1.38975	4.5e-15	1.41e-14
GMPPA	5.56356	11.5659	1.05579	1.45e-24	2.37e-23
PIK3IP1	2.58945	5.99166	1.21031	2.14e-10	4.45e-10
BNIPL	0.05625	0.293629	2.38407	1.75e-21	1.32e-20
AL450124.1	0.284128	0.603576	1.08699	0.00105909	0.00134194
CEP295	0.210467	0.620596	1.56006	3.38e-18	1.51e-17
RBMX2	2.79276	5.97608	1.09751	9.03e-23	8.87e-22
AC034229.4	0.0241144	0.280543	3.54025	2.25e-19	1.18e-18
LINC01006	0.914297	2.08016	1.18596	1.01e-15	3.38e-15
DYNLRB1	14.2906	36.087	1.33642	1.02e-25	2.56e-24
FAM219B	0.373232	0.913517	1.29136	1.55e-17	6.38e-17
CDC42SE1	5.54028	12.2051	1.13946	4.79e-16	1.66e-15
UNKL	0.35756	1.18772	1.73194	3.95e-20	2.31e-19
AC002075.2	0.159659	0.495377	1.63353	6.01e-11	1.31e-10
AC062029.1	0.175961	0.407395	1.21117	1.4e-13	3.8e-13
AL009178.2	0.156208	0.468787	1.58546	9.25e-08	1.58e-07
U62317.2	1.54593	3.76831	1.28544	5.74e-16	1.98e-15
LNCSRLR	0.123079	0.277579	1.17332	3.85e-05	5.44e-05
GYS2	38.5894	12.5541	-1.62004	4.34e-21	3.03e-20
AC009309.1	0.387314	0.854118	1.14093	3.58e-08	6.28e-08
RNF215	0.498227	1.32873	1.41517	1.64e-27	1.3e-25
TUBGCP6	1.76729	4.20146	1.24936	1.41e-19	7.58e-19
STPG3-AS1	0.139222	0.77431	2.47552	2.17e-14	6.39e-14
ACNATP	0.190524	0.554463	1.54112	0.000591645	0.000764161
AP000759.1	0.605085	1.53736	1.34525	3.18e-14	9.2e-14
AC024060.1	0.86913	2.73328	1.65299	8.19e-23	8.11e-22
AL049840.4	2.0573	5.37517	1.38556	1.63e-19	8.72e-19
HNRNPA1	25.5684	61.6666	1.27013	1.94e-23	2.28e-22
AC010547.2	2.31583	1.13197	-1.03269	5.12e-24	6.97e-23
ZNF530	0.125663	0.446374	1.82869	1.14e-16	4.26e-16
CCDC137	2.614	8.36848	1.6787	3.21e-27	2e-25
ZNF436-AS1	0.171084	0.482942	1.49714	1.48e-18	6.87e-18
TBC1D10C	0.74175	1.52591	1.04066	0.000521486	0.000676266
AC245884.8	0.0902014	0.401267	2.15334	3.44e-19	1.75e-18
EIF2B1	5.57952	11.5495	1.04962	2.69e-27	1.79e-25
AC009690.2	0.0831681	0.325002	1.96635	8.04e-24	1.04e-22
FAT1	2.96571	8.20075	1.46738	1.02e-10	2.18e-10
CASP8	1.37689	2.83142	1.04012	1.52e-15	4.99e-15
TSTA3	11.3566	26.2033	1.20622	9.59e-18	4.05e-17
CYP2C8	449.462	100.575	-2.15993	6.04e-26	1.71e-24
ZBTB17	2.11437	4.38108	1.05106	7.65e-24	9.98e-23
MIF	18.5365	45.6984	1.30177	2.78e-13	7.37e-13
RPLP0	127.199	293.005	1.20384	7.81e-20	4.37e-19
CNPY2	5.93647	13.064	1.13792	6.18e-23	6.32e-22
MIR659	0.181292	0.419981	1.21201	3.89e-05	5.49e-05
TSGA10	0.107903	0.232131	1.1052	1.99e-14	5.88e-14
TFAP2A-AS1	0.00972574	0.270033	4.79518	3.04e-15	9.68e-15
FBXO2	7.8112	19.2358	1.30018	0.00770761	0.00915563
TSEN15	3.61362	8.78371	1.28139	1.71e-25	3.96e-24
FAM81A	0.0309074	0.235609	2.93037	7.13e-16	2.43e-15
AC009065.2	0.0867674	0.263152	1.60067	0.000724713	0.000931056
P2RY13	1.64355	0.678391	-1.27663	5.1e-12	1.21e-11
AL132989.1	0.295301	0.66163	1.16384	1.61e-07	2.69e-07
ACAD11	0.674515	0.314301	-1.1017	7.76e-15	2.37e-14
RPL17P34	0.0576563	0.237218	2.04066	1.67e-12	4.14e-12
RCAN3	0.442287	1.07933	1.28708	2.7e-08	4.79e-08
EIF5A2	0.30803	1.32898	2.10917	2.85e-06	4.37e-06
SHARPIN	9.96384	29.6455	1.57304	9.69e-27	4.19e-25
AC083880.1	0.202429	0.676264	1.74017	1.55e-14	4.6e-14
ADNP	4.10733	8.87375	1.11134	1.74e-19	9.27e-19
MICB	0.463991	1.75029	1.91543	1.08e-15	3.61e-15
PALM2	0.443907	0.192782	-1.20329	2.84e-14	8.25e-14
SLC7A6	0.102122	0.570686	2.4824	1.24e-22	1.18e-21
BCAS1	0.0494981	0.453406	3.19536	5.52e-05	7.69e-05
BTN2A2	0.703647	1.81533	1.36731	6.08e-17	2.33e-16
GSTM2	0.271785	0.548346	1.01262	0.000818116	0.00104654
JARID2	1.05154	2.2582	1.10266	6.82e-16	2.33e-15
RPL28	35.6258	89.4302	1.32784	1.12e-18	5.32e-18
RAVER1	0.682859	1.5414	1.17458	2.31e-08	4.13e-08
ALMS1	0.422867	0.974416	1.20433	1.32e-18	6.2e-18
ATP13A1	3.35038	8.11378	1.27605	2.54e-26	8.76e-25
AL118511.2	0.0256685	0.430417	4.06767	7.14e-13	1.83e-12
ATP2A1-AS1	0.0633183	0.498605	2.9772	2.75e-16	9.83e-16
ULK4	0.335319	1.09137	1.70253	5.48e-11	1.2e-10
CIP2A	0.10837	0.849222	2.97018	5.21e-22	4.35e-21
HEATR1	0.954837	2.90239	1.60391	9.64e-19	4.6e-18
AC138207.2	0.16319	0.450991	1.46654	1.17e-08	2.12e-08
AL451050.2	0.0395275	0.323751	3.03395	2.4e-24	3.63e-23
RPL13AP6	0.100507	0.233181	1.21416	2.57e-06	3.96e-06
HLA-F	10.5699	23.8791	1.17578	1.95e-08	3.5e-08
VSIG1	0.0419896	1.13595	4.75772	1.94e-08	3.48e-08
EPHB2	0.110487	0.982702	3.15288	3.73e-08	6.55e-08
FASTK	9.53834	24.1437	1.33984	3.35e-26	1.1e-24
BCL2L12	3.1132	8.60288	1.46642	6.65e-23	6.72e-22
BCL6B	0.981765	2.56437	1.38516	5.77e-17	2.22e-16
TPM4	7.84757	19.2444	1.29412	1.79e-09	3.47e-09
MANF	15.0667	46.3412	1.62093	6.18e-23	6.32e-22
FAM110A	0.8083	2.485	1.62028	6.59e-18	2.85e-17
MFSD5	4.097	10.279	1.32705	8.7e-26	2.26e-24
CEP95	0.891252	2.15306	1.27248	1.56e-21	1.19e-20
RNPEPL1	5.44707	12.6211	1.21228	1.07e-23	1.34e-22
CASQ2	0.110269	0.449845	2.02841	7.03e-11	1.53e-10
LINC01291	0.119413	0.280454	1.23181	0.00487032	0.00587778
MCM8	0.273864	1.1928	2.12282	5.53e-22	4.59e-21
PKN3	0.764258	3.28562	2.10403	1.94e-22	1.76e-21
DOLK	5.108	10.4787	1.03663	8.77e-24	1.13e-22
PLAC9	1.34449	4.14242	1.62342	0.00108801	0.00137732
S100PBP	0.524332	1.23681	1.23807	1.68e-19	8.99e-19
AC007191.1	0.116178	0.335446	1.52974	2.41e-08	4.3e-08
LRRC39	0.111979	0.429877	1.94069	7.7e-14	2.14e-13
SEPSECS-AS1	0.283386	0.657305	1.21379	6.91e-15	2.12e-14
SLITRK3	1.4767	0.344033	-2.10176	1.75e-17	7.17e-17
MIR3677	0.0825431	0.34877	2.07905	6.87e-06	1.02e-05
AP003392.6	0.131398	0.425299	1.69453	9.38e-17	3.52e-16
DCN	17.7759	5.59696	-1.6672	1.56e-19	8.35e-19
SOX12	1.41507	6.13898	2.11713	3.11e-19	1.6e-18
UBE2SP1	0.10631	0.404412	1.92755	2.98e-09	5.67e-09
TAF11	7.33063	16.8527	1.20097	2.44e-26	8.6e-25
TUBB	67.8035	159.492	1.23405	5.2e-18	2.27e-17
EXOC3	2.7522	5.66445	1.04135	6.34e-25	1.17e-23
ZNF669	0.47646	1.36871	1.52239	1.28e-14	3.84e-14
GPM6A	1.07626	0.182789	-2.55777	6.42e-26	1.79e-24
NAT10	3.37215	6.93359	1.03993	1.94e-24	3.04e-23
AARS2	1.79061	4.97316	1.47371	1.71e-26	6.51e-25
AC108047.1	0.239739	0.504403	1.07311	2.28e-06	3.51e-06
AL139289.1	0.0853635	0.334227	1.96914	2.78e-15	8.89e-15
ARHGAP27P1-BPTFP1-KPNA2P3	0.177379	0.584585	1.72058	8.63e-21	5.68e-20
GLUL	58.1799	366.945	2.65697	0.000190569	0.000254815
HSP90AB3P	0.0815268	0.324708	1.9938	2.34e-18	1.06e-17
SLC6A8	0.496972	6.25034	3.6527	7.21e-13	1.84e-12
LRRC56	0.235078	0.537488	1.19309	2.74e-07	4.52e-07
CDC45	0.170876	2.37975	3.79979	2.2e-26	7.98e-25
KISS1	0.618035	3.13862	2.34437	1.14e-13	3.13e-13
VNN2	1.30905	6.67308	2.34983	0.00289016	0.00355486
PNMA1	1.73026	5.43405	1.65104	1.63e-14	4.84e-14
HSPA1A	22.6017	60.0711	1.41024	5.02e-12	1.19e-11
VPS37D	1.4678	3.42577	1.22277	6.73e-12	1.58e-11
SARM1	0.119516	0.320418	1.42275	2.23e-11	5.02e-11
CS	5.37879	13.8183	1.36123	1.45e-22	1.36e-21
AC099568.2	0.10788	0.477372	2.14569	5.31e-17	2.05e-16
DRAP1	19.6546	44.0086	1.16292	4.14e-24	5.78e-23
ASPM	0.0917315	2.04018	4.47513	1.98e-27	1.45e-25
RNU6-418P	0.135571	0.448484	1.72601	2.38e-05	3.41e-05
TMEM65	0.653342	2.15214	1.71986	2.68e-16	9.59e-16
CDC123	8.93996	18.9611	1.0847	3.34e-25	6.84e-24
IFFO2	0.944981	2.14734	1.18419	2.89e-11	6.45e-11
AL133370.1	0.00763825	0.401755	5.71693	7.81e-07	1.25e-06
AC092803.2	0.279884	0.929443	1.73154	2.35e-21	1.73e-20
FARSB	4.31363	10.0196	1.21585	4.43e-25	8.59e-24
WDR92	0.127783	0.289889	1.18181	5.35e-21	3.68e-20
EIF4HP2	0.0916614	0.460921	2.33013	3.35e-15	1.06e-14
DTD1	2.1687	5.24645	1.27451	2.02e-12	4.97e-12
ZG16	7.80186	3.38788	-1.20343	7.61e-15	2.33e-14
CENPS	0.632239	1.39128	1.13787	1.44e-14	4.29e-14
CBX5	1.57755	3.67833	1.22137	1.27e-15	4.2e-15
MAZ	4.08435	11.3879	1.47933	7.22e-20	4.06e-19
AC002550.2	0.118621	0.422029	1.83098	1.61e-17	6.61e-17
ARNTL2	0.699533	1.59074	1.18524	9.94e-05	0.000135694
AC099489.2	0.0174495	0.296142	4.08503	1.05e-11	2.44e-11
ZFYVE19	3.15024	6.45174	1.03423	1.79e-20	1.12e-19
PHF6	0.731324	1.743	1.25299	5.83e-17	2.24e-16
HCN2	0.038263	0.563925	3.88148	5.41e-16	1.87e-15
CAV1	4.22235	8.7237	1.04689	3.25e-09	6.16e-09
METTL21A	0.884909	1.82075	1.04093	1.92e-22	1.74e-21
ZSWIM9	0.863725	2.20015	1.34896	9.28e-26	2.39e-24
AL355802.1	0.163608	0.392795	1.26353	8.22e-11	1.77e-10
AC138356.1	0.811359	0.235932	-1.78197	7.7e-23	7.66e-22
KIZ	1.08735	3.02846	1.47776	4.28e-23	4.53e-22
DNAJC3-DT	0.431365	1.02251	1.24513	7.99e-11	1.72e-10
MLLT6	1.71691	4.28589	1.31978	9e-18	3.82e-17
AL441992.1	1.04832	3.2731	1.64259	1.85e-20	1.15e-19
RIN1	0.299165	0.690816	1.20736	2.81e-07	4.63e-07
AL451074.6	0.0201767	0.257605	3.6744	5.44e-07	8.8e-07
TM4SF18	0.917752	1.84485	1.00733	2.12e-09	4.07e-09
OLA1P1	0.190446	0.410833	1.10917	3.16e-12	7.65e-12
KLF13	2.10964	6.91866	1.7135	4.91e-19	2.44e-18
HINFP	0.511368	1.15039	1.16969	4.43e-25	8.59e-24
POLR2J4	0.618527	1.26525	1.03251	1.01e-16	3.79e-16
NUDT2	7.28608	17.121	1.23256	4.35e-19	2.18e-18
MIR4258	0.0636694	0.347797	2.44958	6.74e-09	1.25e-08
DGKQ	1.45744	4.03087	1.46765	4.12e-23	4.38e-22
TRIM66	0.295166	0.785354	1.41182	2.83e-17	1.13e-16
AC111149.2	0.14462	0.810595	2.48672	2.98e-06	4.56e-06
AC025627.1	0.418873	1.34277	1.68063	0.000140443	0.000189522
AC133065.3	0.359027	0.76973	1.10026	7e-08	1.2e-07
ATP8B3	0.116806	0.392234	1.7476	2.24e-10	4.66e-10
LNPEP	0.877153	1.76982	1.0127	8.78e-12	2.04e-11
AL021328.1	1.38585	0.473786	-1.54846	1.47e-16	5.4e-16
AC132812.1	0.822282	2.57563	1.64722	1.06e-18	5.05e-18
INPP5E	1.35349	3.22535	1.25277	1.93e-19	1.02e-18
SAA2	535.161	147.055	-1.86361	1.92e-06	2.97e-06
CAD	1.06864	4.25622	1.9938	5.58e-26	1.62e-24
ZNF449	0.225158	0.588621	1.3864	1.02e-21	7.99e-21
TERT	0.00191236	1.36934	9.48391	5.48e-26	1.6e-24
GIPR	0.0496797	0.334761	2.75241	0.00342967	0.0041971
DMBT1	0.00636616	0.932205	7.19408	5.11e-06	7.68e-06
GLMN	0.527094	1.45558	1.46546	1.09e-25	2.7e-24
AC090517.2	0.152264	0.406699	1.41738	5.02e-12	1.19e-11
TSPEAR-AS2	0.0903907	0.920925	3.34884	5.74e-10	1.15e-09
MAFG	1.05616	4.15899	1.97741	7.43e-23	7.4e-22
SGSM3	4.61029	10.0265	1.1209	8.81e-26	2.29e-24
DNAJB5	0.492191	1.00097	1.02411	5.97e-15	1.84e-14
AKR1B10	21.5625	348.405	4.01417	1.73e-11	3.94e-11
CMTM3	2.21746	5.37288	1.27679	1.35e-07	2.27e-07
LINC00638	0.147381	0.428887	1.54104	3.97e-12	9.49e-12
METTL23	6.25799	13.4268	1.10135	1.32e-23	1.62e-22
APOLD1	1.57173	3.5915	1.19223	8.35e-09	1.54e-08
PLXND1	3.20016	8.7289	1.44766	5.61e-18	2.44e-17
PAG1	0.982854	1.98249	1.01226	0.0010372	0.001315
AC073063.1	0.121852	0.366008	1.58675	8.9e-18	3.78e-17
AL445673.1	0.0533989	0.35995	2.75291	1.7e-06	2.66e-06
AL355297.4	0.157801	0.379796	1.26712	9.48e-07	1.5e-06
HLA-DOB	0.407638	1.31837	1.6934	3.74e-05	5.28e-05
TEX11	0.0160481	0.440954	4.78015	1.36e-05	1.98e-05
HSPA2	0.831252	1.69369	1.02681	5.1e-07	8.25e-07
AL596244.1	0.166555	0.44668	1.42324	9.89e-12	2.29e-11
GRINA	81.5721	174.435	1.09654	3.45e-18	1.54e-17
TTYH2	0.285962	0.987917	1.78857	3.97e-10	8.08e-10
KIF22	3.97668	9.65484	1.27969	1.1e-20	7.13e-20
HMBS	2.84493	6.07767	1.09513	4.39e-23	4.63e-22
TMEM183A	3.36761	7.02443	1.06066	2.2e-24	3.38e-23
IMPDH2	12.9192	36.5296	1.49954	3.89e-24	5.5e-23
C1RL	48.6982	23.6932	-1.0394	1.27e-22	1.21e-21
SCNN1D	0.60223	1.48447	1.30157	5.83e-10	1.17e-09
AL591845.1	0.11047	0.428249	1.9548	8.63e-15	2.63e-14
INHA	0.0341132	1.46051	5.42	4.72e-07	7.66e-07
KLKB1	57.6342	27.419	-1.07175	5.73e-18	2.49e-17
CTTN	8.36283	20.4803	1.29217	2.55e-27	1.72e-25
ST7-AS1	0.206386	0.545946	1.40342	9.95e-11	2.13e-10
PCAT6	0.417314	2.05274	2.29835	5.74e-19	2.82e-18
AC004492.1	0.0913764	0.307436	1.75039	1.69e-16	6.19e-16
AC015813.5	0.155608	0.416736	1.42122	2.92e-15	9.31e-15
LINC01341	0.130968	0.539349	2.042	1.08e-13	2.97e-13
SNRPGP15	0.0861251	0.452935	2.3948	7.35e-12	1.72e-11
AC055713.1	0.0594355	0.240589	2.01718	3e-27	1.9e-25
LRG1	345.353	160.335	-1.10698	1.51e-11	3.45e-11
ANO10	1.81143	4.9785	1.45858	1.52e-22	1.42e-21
ZNF76	1.92353	4.51138	1.22981	4.08e-26	1.27e-24
LRP5L	0.509874	1.18745	1.21965	1.59e-13	4.31e-13
AL022328.3	0.300845	0.606935	1.01252	6.85e-08	1.18e-07
SNRPE	10.9959	38.9375	1.82419	6.62e-28	7.32e-26
LINC01063	0.0966336	0.297361	1.62162	7.29e-06	1.08e-05
AC006213.5	0.103266	0.378892	1.87542	3.09e-06	4.72e-06
TAZ	1.72355	5.52082	1.6795	7.52e-29	3.64e-26
GPRC5D	0.0959445	0.264919	1.46528	7e-06	1.04e-05
MT1E	468.065	109.613	-2.09429	1.27e-22	1.21e-21
AC096887.2	0.153246	0.671804	2.13219	5.74e-21	3.92e-20
EXOSC8	1.8803	3.80987	1.01878	2.47e-21	1.81e-20
AL139089.1	0.0844164	0.434985	2.36537	4.28e-23	4.53e-22
IBSP	0.00242853	0.701716	8.17466	4.82e-11	1.06e-10
SLC9A3-AS1	0.448641	3.05184	2.76605	3.34e-13	8.79e-13
ZNF706	3.34507	9.19768	1.45923	2.09e-26	7.65e-25
LINC01134	0.08592	0.338253	1.97704	6.21e-17	2.38e-16
MCMDC2	0.0720883	0.266105	1.88416	1.81e-20	1.13e-19
HSPA1L	0.341739	0.70484	1.0444	1.89e-13	5.1e-13
NUDT1	0.946982	5.22763	2.46475	1.83e-26	6.86e-25
AC115618.3	2.77539	7.26351	1.38798	4.53e-20	2.63e-19
NXF1	4.26473	8.55671	1.0046	1.62e-22	1.5e-21
ZNF385D	0.0206754	0.443669	4.4235	2.47e-08	4.39e-08
UBE2I	2.76292	5.78158	1.06527	1.87e-22	1.71e-21
CYP27B1	0.0753958	0.366021	2.27937	3.87e-16	1.36e-15
AC010331.1	0.119088	0.606362	2.34815	7.63e-22	6.19e-21
NEU3	0.572363	1.29423	1.1771	1.28e-17	5.33e-17
CSPG4	0.211384	1.52855	2.85423	1.48e-25	3.51e-24
UTP23	1.17179	2.52317	1.10652	9.43e-19	4.51e-18
PANX2	2.88694	7.21971	1.3224	0.00570716	0.00684564
TMEM199	1.60525	3.43234	1.0964	6.2e-26	1.74e-24
TRMT112	32.027	67.5076	1.07576	5.02e-23	5.23e-22
TEDC2	0.167505	1.88179	3.48982	6e-27	3.02e-25
ANLN	0.103797	2.32737	4.48687	7.63e-27	3.53e-25
LINC02587	0.0200128	0.301016	3.91084	0.000179425	0.000240261
AC069224.1	0.0714373	0.288808	2.01536	1.2e-18	5.65e-18
LPCAT2	0.474627	1.25589	1.40385	0.000234735	0.00031207
KCNE3	0.679353	1.81708	1.41939	6.02e-13	1.55e-12
NETO2	0.0588727	0.450838	2.93694	7.75e-24	1.01e-22
AC106782.2	1.00161	2.27265	1.18206	7.14e-12	1.67e-11
PET117	2.03346	4.18734	1.0421	2.49e-19	1.3e-18
BAMBI	7.24775	17.039	1.23323	0.000177963	0.000238342
HAUS5	0.887652	2.89559	1.70579	1.15e-27	1.02e-25
BAG6	23.4981	49.0073	1.06045	1.2e-24	2.01e-23
AC132192.2	0.117529	0.973848	3.05069	4.78e-28	6.14e-26
NSMCE2	1.85566	7.6083	2.03565	6.37e-29	3.32e-26
DOK4	4.60128	9.35828	1.02421	1.94e-12	4.76e-12
C17orf67	0.363246	0.809173	1.1555	0.00176817	0.00220819
TBC1D16	0.799431	4.14426	2.37407	1.11e-27	9.94e-26
AL021878.2	0.116443	0.352564	1.59826	4.45e-12	1.06e-11
RPL13P5	0.239721	0.758793	1.66235	1.09e-17	4.58e-17
LZTS1	0.229122	0.961268	2.06882	6.74e-17	2.57e-16
ZNF7	0.556809	1.68011	1.5933	4.47e-28	6.03e-26
MUS81	1.81563	4.17405	1.20098	1.39e-26	5.51e-25
CPLX2	0.0104581	9.16643	9.7756	7.61e-15	2.33e-14
TICRR	0.0163147	0.356409	4.44929	4.36e-27	2.46e-25
RNU6-510P	0.169242	0.365742	1.11174	0.000763331	0.000978711
C6orf62	17.8693	38.062	1.09087	6.74e-20	3.81e-19
TBC1D22A	3.11195	6.53354	1.07005	1.27e-21	9.86e-21
LINC00886	0.43178	1.15087	1.41435	4.27e-05	6e-05
ENPP2	4.15292	9.06023	1.12542	9.16e-05	0.000125413
LIMK2	1.7126	5.40627	1.65845	8.59e-16	2.9e-15
AARSD1	0.392584	1.03974	1.40515	1.71e-25	3.96e-24
DPM3	30.6518	66.7112	1.12196	9.6e-13	2.42e-12
PLPP3	35.3994	17.4303	-1.02212	3.08e-17	1.23e-16
SCPEP1	5.74739	12.928	1.16952	5.91e-05	8.21e-05
FPR1	2.15173	0.952986	-1.17497	2.27e-12	5.55e-12
AC008897.1	0.0950087	0.218826	1.20365	4.24e-06	6.41e-06
ZSCAN16	0.85117	2.95198	1.79416	1.18e-24	1.98e-23
RPL36	66.8618	148.2	1.14829	5.97e-15	1.84e-14
HYPK	0.100724	0.224202	1.15438	7.59e-21	5.05e-20
AL353764.1	0.181949	0.403834	1.15023	0.00352886	0.00431374
AL161937.2	0.136276	0.321622	1.23883	3.41e-05	4.83e-05
AC015813.6	0.413425	0.990305	1.26025	1.09e-13	2.99e-13
LCN2	3.78638	138.255	5.19037	1.91e-10	3.99e-10
STRIP2	0.0415058	0.446444	3.42709	4.87e-21	3.37e-20
AC133644.2	0.0479839	0.407608	3.08656	3.36e-09	6.36e-09
CABIN1	1.5299	4.01251	1.39107	3.22e-23	3.55e-22
LINC01589	0.0357512	0.546449	3.93402	0.00235466	0.00291641
PTMAP2	0.602117	1.43573	1.25367	2.74e-10	5.64e-10
POLRMT	6.61304	14.0814	1.0904	3.99e-24	5.6e-23
AL358075.2	0.0254301	0.278476	3.45294	3.53e-15	1.12e-14
AC009533.1	0.274386	0.957569	1.80317	3.1e-18	1.38e-17
TMEM178A	0.314351	0.870857	1.47006	9.09e-06	1.34e-05
MAP1B	0.372091	1.26977	1.77084	1.65e-13	4.47e-13
SALL2	0.209514	0.996084	2.24922	0.0084106	0.00996374
RCCD1	0.958571	2.5815	1.42925	5.3e-26	1.55e-24
PDE5A	0.19598	0.503872	1.36235	1.58e-06	2.48e-06
ITGA7	1.67653	3.77243	1.17002	4.31e-13	1.12e-12
ASAP1	1.22887	3.33005	1.43821	1.38e-13	3.77e-13
GTF3C6	15.2594	31.9666	1.06687	5.74e-15	1.78e-14
LCN12	1.36904	2.85558	1.06061	1.64e-10	3.45e-10
DCAF13	1.27694	4.11888	1.68957	5.96e-26	1.69e-24
MT1F	89.0604	17.0529	-2.38476	3.39e-23	3.71e-22
ATXN2L	4.6787	11.4471	1.2908	1.36e-20	8.65e-20
THOC5	1.12196	2.98764	1.41298	6.2e-26	1.74e-24
EEF1A1P5	5.20478	10.804	1.05366	0.000823572	0.00105336
AL137002.1	0.138965	0.457885	1.72027	1.24e-07	2.09e-07
ZNF581	2.16265	7.78398	1.84771	4.41e-26	1.35e-24
STC2	0.27725	1.96477	2.8251	1.14e-18	5.37e-18
CYP39A1	16.7197	4.5176	-1.88792	9.95e-23	9.68e-22
CDCA8	0.252765	3.92687	3.95751	5.26e-28	6.44e-26
PITX1	0.019081	1.76008	6.52736	3.23e-15	1.03e-14
COMMD2	1.91149	4.25121	1.15318	2.53e-21	1.84e-20
LRRC37A17P	0.127738	0.340055	1.41259	4.07e-12	9.73e-12
NEDD4L	1.33666	3.67222	1.45802	1.3e-19	7.03e-19
RPS29P16	0.116069	0.326136	1.49049	2.39e-09	4.58e-09
AL136454.1	0.378607	1.08754	1.5223	2.57e-15	8.24e-15
NAA80	1.86636	4.18741	1.16583	1.23e-18	5.77e-18
HPN-AS1	0.354794	0.953742	1.42662	5.85e-11	1.28e-10
TM4SF20	0.0107298	4.68895	8.7715	1.96e-06	3.04e-06
C2orf15	0.112871	0.376813	1.73917	2.46e-06	3.78e-06
AP1S3	0.167629	0.383665	1.19458	1.28e-07	2.16e-07
CCR10	0.0577066	0.223529	1.95365	7.2e-10	1.44e-09
SYCE2	0.258522	0.654483	1.34007	5.45e-14	1.54e-13
PDGFRB	2.87988	10.1956	1.82386	7.33e-17	2.79e-16
ARID3A	0.294382	2.81373	3.25672	2.49e-18	1.13e-17
AC004943.2	0.120509	0.322988	1.42234	1.67e-10	3.5e-10
AC138696.2	0.58664	2.54174	2.11527	2.28e-20	1.39e-19
CWC27	1.63948	3.62057	1.14298	7.68e-25	1.37e-23
RNU6-88P	0.366624	0.75274	1.03785	0.00200158	0.00249129
Z74021.1	0.489933	1.18384	1.27282	3.77e-09	7.11e-09
KLHL2P1	0.111429	0.274808	1.30229	0.000618449	0.000797546
AP002495.1	0.0913294	0.254371	1.47778	3.44e-20	2.04e-19
LTBP2	0.965348	3.62297	1.90805	6.44e-08	1.11e-07
BRCA2	0.0693945	0.288753	2.05694	4.81e-19	2.39e-18
AC005077.2	0.624077	0.203445	-1.61709	3.04e-15	9.69e-15
TAF1A	0.295417	0.927113	1.64999	6e-19	2.94e-18
HSPG2	2.03011	5.12675	1.33649	1.35e-05	1.97e-05
ADRA1A	5.33634	0.904706	-2.56033	1.94e-24	3.04e-23
GSDMD	12.9531	31.0752	1.26247	2.96e-22	2.58e-21
FCGR2B	1.75034	0.811006	-1.10985	1.3e-18	6.08e-18
CDC37	18.807	41.796	1.1521	9.68e-28	9.33e-26
HIST1H2BJ	0.323363	1.73864	2.42674	3.03e-13	8.02e-13
PPP1R3F	0.581984	1.30694	1.16715	1.46e-09	2.85e-09
AL355574.1	0.219373	0.91761	2.0645	6.62e-19	3.23e-18
MEP1A	0.0227498	3.49733	7.26425	1.2e-09	2.36e-09
AL365181.3	0.226268	4.24174	4.22855	7.58e-18	3.25e-17
AC037487.3	0.104233	0.817356	2.97116	1.68e-14	4.98e-14
DLX5	0.00330879	0.29529	6.47969	3.86e-14	1.11e-13
PKN1	7.78935	25.4021	1.70537	1.92e-20	1.19e-19
ZDHHC11	0.192876	0.459847	1.25348	0.000159727	0.000214607
TEPSIN	0.846501	2.44281	1.52896	1.05e-27	9.67e-26
TMEM61	0.0478661	0.443063	3.21043	0.000139471	0.000188332
AC092953.2	0.18004	0.409432	1.18531	1.55e-09	3.02e-09
SCARNA21	0.0645605	0.357959	2.47107	4.29e-06	6.49e-06
AKR1C1	27.5296	64.1935	1.22145	0.000384398	0.000503183
JSRP1	0.122905	0.478018	1.95952	0.000293909	0.000388233
TIMM9	6.28806	12.9918	1.04692	9.03e-23	8.87e-22
PIP5K1C	1.46714	3.71913	1.34196	3.88e-23	4.15e-22
PPIAP39	0.0554836	0.302917	2.44879	4.27e-05	6e-05
SEC11C	11.6786	25.2836	1.11433	2.49e-15	8.01e-15
MRE11	0.712554	1.60001	1.16701	1.02e-18	4.84e-18
CCT6A	12.9514	36.8781	1.50965	2.96e-27	1.9e-25
DESI2	2.41549	6.46458	1.42024	3.56e-23	3.87e-22
DNAH14	0.093731	0.366279	1.96635	3.77e-26	1.2e-24
CPSF6	2.43659	5.72697	1.23291	4.07e-23	4.33e-22
CLSPN	0.03406	0.412924	3.59973	4.73e-22	3.98e-21
PIK3C2B	0.775023	2.38666	1.62268	2.26e-18	1.03e-17
CASTOR1	0.241504	0.540701	1.16278	2.66e-09	5.07e-09
KBTBD11	2.52182	0.774178	-1.70373	1.81e-20	1.13e-19
S100A3	0.11162	0.652697	2.54782	1.34e-17	5.58e-17
AC005911.1	0.108955	0.362365	1.73371	1.68e-14	4.97e-14
TRPC1	0.138664	0.409549	1.56244	9.57e-06	1.41e-05
SNORA33	1.42251	4.46821	1.65126	6.07e-13	1.56e-12
RASAL2	0.386716	1.04804	1.43835	1.26e-13	3.45e-13
ARHGEF9	0.74125	1.49591	1.01299	1.33e-17	5.55e-17
SNPH	0.0697323	0.268982	1.94761	3.8e-09	7.17e-09
ATP6V1C1	4.1419	12.9955	1.64965	1e-24	1.73e-23
RPRD2	2.51917	5.35228	1.08721	9.5e-17	3.57e-16
PLPP1	14.9912	30.8774	1.04244	9.08e-10	1.8e-09
ARIH2OS	0.2474	0.78973	1.67451	1.82e-24	2.88e-23
OXCT1	0.275235	1.49392	2.44037	0.000229146	0.000304736
ERCC2	1.95111	4.58609	1.23297	6.75e-24	8.96e-23
ATG10	0.64359	1.30752	1.02262	1.11e-22	1.07e-21
AL356299.2	0.0804936	0.250985	1.64065	1.22e-10	2.59e-10
AC008771.1	1.04518	2.52941	1.27505	5.02e-19	2.49e-18
PCLAF	0.291249	2.71425	3.22023	7.06e-26	1.93e-24
FOXP4	5.24202	11.8079	1.17155	4.06e-18	1.79e-17
EFNA4	1.76632	8.32854	2.23732	1.78e-26	6.72e-25
TRAPPC4	2.86516	5.93171	1.04983	1.65e-18	7.62e-18
FLT1	1.4138	2.88185	1.02742	2.78e-10	5.73e-10
CHCHD3	4.4364	9.5669	1.10866	1.61e-21	1.23e-20
AC009283.1	1.81462	4.56969	1.33243	7.56e-19	3.67e-18
HIST1H2BF	0.0308001	0.283391	3.20179	2.74e-11	6.12e-11
DUSP22	2.67351	5.45023	1.02758	4.72e-18	2.07e-17
SBF1	1.69818	5.54361	1.70684	7.54e-22	6.12e-21
PLEC	5.8588	15.132	1.36893	1.95e-19	1.03e-18
RIT1	1.50301	3.78992	1.33431	1.09e-21	8.54e-21
AC002398.1	0.309954	0.894128	1.52843	4.96e-15	1.55e-14
C2orf76	1.26533	2.78057	1.13586	2.2e-24	3.38e-23
APOBEC3H	0.19076	0.430422	1.174	2.21e-07	3.66e-07
AC007405.3	0.903436	2.43442	1.43008	8.72e-15	2.65e-14
MANBAL	7.8327	19.9679	1.3501	5.86e-28	6.7e-26
AC234917.1	0.0597801	0.237653	1.99112	1.7e-10	3.56e-10
CENPO	0.26036	1.28712	2.30556	2.58e-23	2.92e-22
VPS37C	1.68754	3.88248	1.20206	2.5e-22	2.2e-21
HNRNPCP7	0.139249	0.346827	1.31655	7.49e-08	1.29e-07
AC026271.1	0.951917	1.91464	1.00817	1.41e-19	7.58e-19
AC145285.2	0.104676	0.286612	1.45317	1.02e-17	4.31e-17
ZNF432	0.357805	1.00078	1.48388	5.65e-17	2.17e-16
CTD-2297D10.2	0.00866214	0.788276	6.50783	1.47e-07	2.47e-07
LRRC37B	0.175164	0.474014	1.43622	6.74e-18	2.91e-17
KIF21B	0.222709	0.954454	2.09952	1.1e-12	2.76e-12
THSD7A	0.187392	0.49755	1.40878	3.96e-06	6e-06
WDR5	5.35759	12.3975	1.2104	8.35e-24	1.08e-22
ACVRL1	1.05007	2.62503	1.32185	2.58e-18	1.16e-17
HIST1H3E	0.331747	1.71605	2.37094	6.92e-16	2.36e-15
SSX1	0.0100881	8.02986	9.63657	8.83e-11	1.9e-10
SPAG5	1.32834	5.6632	2.09199	1.28e-19	6.96e-19
CDK5R1	0.132233	0.531763	2.0077	1.57e-17	6.45e-17
TMEM191A	0.390008	1.06977	1.45573	2.61e-06	4.01e-06
AL161729.3	0.110428	0.223498	1.01716	0.000108691	0.000147845
ZNF321P	0.0861772	0.264251	1.61653	0.00101034	0.0012825
TP53I3	2.59999	14.4143	2.47092	1.47e-22	1.37e-21
TBX2-AS1	0.171174	0.777199	2.18282	9.24e-12	2.14e-11
HSPH1	2.87153	7.21862	1.32991	2.55e-19	1.32e-18
AL139286.2	0.039421	0.266183	2.75538	1.68e-16	6.16e-16
PAGE4	0.0311011	14.6551	8.88022	4.28e-07	6.98e-07
PRR3	0.984312	2.66568	1.43732	1.64e-25	3.83e-24
HTT	1.88861	3.81933	1.016	4.74e-20	2.74e-19
MIR378A	0.0884189	0.284583	1.68642	0.000444073	0.000578168
ARHGAP11A	0.145849	1.44195	3.30547	1.02e-25	2.56e-24
SCAMP3	11.7929	44.8434	1.92698	3.71e-29	2.95e-26
AC025265.1	0.154723	0.565949	1.87098	4.97e-12	1.18e-11
PYGO2	4.06364	15.4142	1.92341	4.38e-29	3.22e-26
MSI1	0.149434	2.57206	4.10534	6.66e-07	1.07e-06
KIF15	0.045681	0.807829	4.14438	2.72e-25	5.82e-24
AC080129.2	0.121195	0.789454	2.70352	1.79e-17	7.34e-17
LGALS8-AS1	0.0591868	0.223418	1.9164	1.53e-11	3.49e-11
TMEM8B	0.877422	2.13054	1.27987	1.82e-21	1.36e-20
AP002360.3	0.0783927	0.429558	2.45406	5.12e-16	1.77e-15
LINC00847	2.09864	4.26408	1.02278	3.39e-16	1.2e-15
LY6H	0.0112182	0.358941	4.99984	3.84e-23	4.11e-22
MUSTN1	0.047088	0.310676	2.72198	5.56e-07	8.98e-07
KLRF1	0.559251	0.244617	-1.19297	9.59e-16	3.22e-15
EXTL3	0.890689	2.15125	1.27218	4.11e-16	1.44e-15
SPIN4	0.266888	0.675525	1.33977	3.6e-08	6.33e-08
ZNF345	0.195697	0.418947	1.09815	3e-14	8.71e-14
BOLA3	1.8109	4.8853	1.43174	5.96e-26	1.69e-24
IL1RL1	0.961816	0.140926	-2.77083	2.86e-14	8.31e-14
TYRP1	0.00860046	0.267725	4.96019	0.000375099	0.000491395
RARRES1	1.12215	5.25155	2.22648	8.3e-06	1.23e-05
FAM161B	0.297707	0.616691	1.05065	2.26e-15	7.29e-15
MT-TM	0.102552	1.01779	3.31101	5.54e-07	8.95e-07
FAM53B	0.830742	2.52243	1.60234	5.02e-20	2.9e-19
AL354760.1	0.0583502	0.22102	1.92137	2.27e-13	6.06e-13
PKD1	0.781408	1.93702	1.30969	7.73e-19	3.74e-18
TOR3A	4.821	13.5907	1.49521	1.3e-18	6.08e-18
AC016773.1	0.0607014	0.578569	3.25269	3.47e-25	7.03e-24
MIR378J	0.119736	0.261521	1.12707	0.00142674	0.00179158
ZNF726	0.101513	0.402753	1.98823	3.12e-07	5.12e-07
AC079907.1	0.0535962	0.26971	2.3312	4.55e-15	1.42e-14
LINC00853	0.287482	2.16618	2.91361	1.23e-21	9.53e-21
MMP9	1.38857	9.15354	2.72073	2.14e-08	3.83e-08
AL442663.4	0.177801	0.56741	1.67413	6.44e-14	1.81e-13
GRPR	0.0232508	0.569674	4.61478	1.04e-09	2.06e-09
AC083843.2	0.297522	0.754353	1.34224	1.38e-08	2.5e-08
AC002116.2	0.101584	0.455346	2.16429	5.13e-19	2.54e-18
AVPR1A	12.8971	3.66519	-1.81508	2.83e-15	9.05e-15
PDSS1	1.17413	3.37173	1.5219	1.29e-21	9.96e-21
IKBIP	1.42614	3.45136	1.27505	2.68e-17	1.08e-16
AL136380.1	0.201739	0.466122	1.20822	7.59e-05	0.000104501
GCNT3	0.134552	1.438	3.41783	3.53e-09	6.67e-09
PRKAR2A-AS1	0.0800301	0.377856	2.23922	5.59e-22	4.64e-21
UQCC2	3.00389	9.19033	1.61328	2.41e-26	8.53e-25
KCTD1	0.232046	0.675417	1.54137	3.13e-15	9.95e-15
KPNA2	4.54772	20.0846	2.14288	3.99e-24	5.6e-23
LINC01481	0.223995	0.55612	1.31193	1.87e-17	7.65e-17
CDH6	0.325763	0.954622	1.55111	0.00320627	0.00393208
RRP1	3.20782	7.6092	1.24615	1.99e-22	1.8e-21
AL031316.1	1.33292	3.54703	1.41202	0.000441901	0.00057552
ARF4-AS1	0.157135	0.450967	1.52102	8.25e-11	1.78e-10
C17orf58	3.61853	9.27278	1.3576	6.18e-25	1.15e-23
CCDC170	0.197576	1.64638	3.05882	4.31e-13	1.12e-12
CDRT15P1	0.117323	0.268418	1.194	2.06e-05	2.96e-05
NOX1	0.146418	0.415608	1.50512	9.7e-15	2.93e-14
PLXDC1	0.073989	0.98773	3.73873	1.95e-27	1.45e-25
E2F8	0.0443753	0.936447	4.39937	3.28e-25	6.75e-24
AC092171.2	0.320882	3.08269	3.26407	1.15e-27	1.02e-25
AC137630.3	0.0806897	0.359375	2.15503	2.45e-14	7.16e-14
NAT8L	0.0206481	0.401058	4.27973	7.7e-06	1.14e-05
PZP	13.2241	0.967307	-3.77305	2.27e-21	1.68e-20
POLA1	0.530662	1.54455	1.54132	4.3e-19	2.16e-18
CTSLP2	0.128801	0.276697	1.10316	0.00470113	0.00567958
OCRL	1.95811	5.65422	1.52987	1.85e-24	2.91e-23
ZNF496	0.71474	1.71154	1.25981	1.96e-06	3.04e-06
ANKRD65	0.339985	3.10075	3.18907	1.85e-09	3.58e-09
RRP9	4.88183	12.9585	1.4084	2.6e-24	3.88e-23
AC096733.2	0.124975	0.270541	1.11421	2.67e-08	4.74e-08
RPL23	40.5102	88.7183	1.13095	5.38e-18	2.34e-17
AC126118.1	0.0330074	0.230655	2.80487	1.21e-18	5.68e-18
BBOX1	12.2886	5.50082	-1.1596	4.39e-13	1.14e-12
RHBDL2	0.0668597	0.225025	1.75088	3.58e-08	6.28e-08
IL1RAP	6.72884	2.74842	-1.29176	3.91e-16	1.37e-15
DUSP18	0.145453	0.351238	1.27189	5.21e-15	1.62e-14
IL1RN	42.1808	14.7112	-1.51967	2.19e-11	4.94e-11
AC090607.2	0.119145	0.269955	1.18	1.17e-05	1.71e-05
GPS2P1	0.11725	0.265724	1.18034	0.000222676	0.000296345
AC124067.4	0.0304465	0.415648	3.77101	1.08e-05	1.59e-05
SEC61G	13.0598	30.6115	1.22894	1.45e-21	1.11e-20
UIMC1	1.38948	2.96783	1.09486	1.42e-22	1.33e-21
LINC00623	0.739846	1.69271	1.19404	2.17e-11	4.9e-11
DUSP1	210.261	101.366	-1.05261	6.88e-14	1.93e-13
NHLRC1	1.32669	3.24424	1.29005	2.71e-14	7.88e-14
AL121583.1	0.0555989	0.232384	2.06338	2.81e-15	8.98e-15
LILRB5	2.08222	0.817013	-1.34969	1.27e-16	4.71e-16
LTB4R	0.673689	1.54511	1.19756	4e-10	8.14e-10
SPAG4	0.688266	2.85817	2.05405	7.99e-15	2.44e-14
RBPJL	0.00307968	1.19681	8.6022	0.00185154	0.00230903
SMPD4	2.28095	5.43784	1.2534	2.14e-22	1.91e-21
NUP210	2.54646	7.57217	1.57221	1.59e-19	8.53e-19
DEFB132	0.0875516	0.797384	3.18707	0.00248832	0.00307716
TRIM71	0.00172497	1.0548	9.25619	5.92e-16	2.04e-15
AL031777.1	0.113236	0.788828	2.80037	1.77e-13	4.79e-13
B4GALT6	0.297784	0.661726	1.15197	2.51e-07	4.15e-07
WHRN	0.360129	1.60013	2.15161	1.56e-22	1.45e-21
PRPF31	9.29589	20.0604	1.10969	3.66e-25	7.31e-24
CAPN10-DT	0.0397736	0.328857	3.04758	2.78e-27	1.83e-25
RELL2	0.13584	0.542194	1.9969	3.47e-18	1.54e-17
CYP1B1	1.33792	5.9497	2.15283	0.00692871	0.00825862
SIPA1L3	0.757912	2.83948	1.90553	1.39e-20	8.83e-20
RTCA-AS1	0.745651	1.73144	1.2154	6.65e-13	1.7e-12
LINC02506	0.137559	2.40083	4.12541	7.54e-05	0.00010392
TSC2	2.49592	5.60578	1.16734	4.51e-22	3.81e-21
MAGEA3	0.0238605	5.97743	7.96876	7.71e-05	0.000106009
SLC35F6	7.98914	19.0325	1.25236	6.9e-23	6.95e-22
LEMD2	2.35178	6.36425	1.43624	1.78e-27	1.37e-25
MEA1	23.0409	62.1401	1.43133	3.18e-28	5.2e-26
AL031963.3	0.190441	0.544199	1.51479	9.1e-13	2.3e-12
GAS8	1.00251	2.31342	1.20641	8.8e-18	3.74e-17
C9orf24	0.144912	0.311536	1.10422	0.000597806	0.0007717
MIR3189	0.67047	1.54303	1.20252	0.0049758	0.00599987
SCRIB	4.14999	16.3631	1.97927	8.37e-27	3.76e-25
AC090587.2	0.111664	0.231569	1.05227	9.22e-06	1.36e-05
PCDHB2	0.0301326	0.383022	3.66803	1.78e-09	3.45e-09
PML	1.50235	3.13655	1.06196	9.29e-18	3.94e-17
CDC7	0.197771	1.36607	2.78812	3.18e-24	4.6e-23
ENTPD6	4.89225	13.7728	1.49325	7.12e-25	1.3e-23
PSPC1	2.8458	5.7492	1.01453	5.31e-19	2.62e-18
AC064807.2	0.0273572	0.271423	3.31055	6.1e-05	8.47e-05
MYBL1	0.166227	0.633667	1.93057	5.31e-17	2.05e-16
ARHGEF37	0.421903	1.8047	2.09678	5.1e-12	1.21e-11
DOCK6	0.932852	2.6017	1.47973	7.64e-26	2.05e-24
SOX9	2.54472	9.97312	1.97054	2.7e-06	4.15e-06
S100A1	0.351554	3.64733	3.37502	7.33e-12	1.71e-11
PIGM	2.18608	4.75223	1.12026	6.99e-23	7.03e-22
TMCO1	12.5832	29.3641	1.22255	1.23e-27	1.06e-25
C2-AS1	0.245822	0.628038	1.35324	6.06e-08	1.05e-07
POLDIP3	7.32825	14.8044	1.01448	6.82e-20	3.85e-19
SMILR	0.0574026	0.323535	2.49473	5.69e-05	7.92e-05
AC073869.1	1.08263	2.67726	1.30622	3.24e-18	1.44e-17
PCGF2	1.58064	4.89446	1.63065	2.94e-21	2.13e-20
ING5	0.776233	1.87303	1.27081	2.46e-23	2.79e-22
AC145207.8	0.0451904	0.452151	3.32271	3.86e-12	9.25e-12
GDPD1	0.247175	0.908843	1.8785	1.89e-17	7.73e-17
HOTTIP	0.0010813	0.318675	8.20317	6.08e-20	3.47e-19
B3GNTL1	0.209013	0.906629	2.11692	9.19e-27	4.05e-25
MFSD10	2.55318	9.07398	1.82944	4.83e-18	2.12e-17
AC125494.2	0.171049	0.390345	1.19034	8.35e-09	1.54e-08
DCTN2	7.20802	18.0154	1.32156	2.52e-28	4.67e-26
AL359853.2	0.0963911	0.280602	1.54156	4.19e-08	7.32e-08
PYY2	0.0668181	0.268203	2.00501	1.12e-12	2.81e-12
SNORA59A	0.211812	0.456905	1.10911	3.49e-06	5.31e-06
HERC2P9	0.160693	0.380619	1.24404	3.53e-13	9.26e-13
IFT172	0.533664	1.32395	1.31084	4.28e-20	2.49e-19
DTX3	0.751815	1.84902	1.29831	0.000263394	0.000349003
RFLNA	0.0282877	1.1356	5.32714	7.46e-10	1.49e-09
LZTS2	1.75471	5.38489	1.61768	2.96e-22	2.58e-21
ZNF300	0.0946531	0.669806	2.82302	5.24e-14	1.49e-13
LINC00239	0.10789	0.636681	2.561	1.43e-05	2.09e-05
RPL35P2	0.295173	0.776988	1.39633	1.3e-13	3.54e-13
RPL37P6	0.618614	1.2981	1.06929	2.19e-05	3.14e-05
VAMP1	0.535102	1.70731	1.67384	6.74e-20	3.81e-19
DDOST	31.0123	69.5071	1.16432	3.94e-24	5.55e-23
PITPNM1	1.58196	3.30681	1.06373	4.4e-10	8.92e-10
RDM1	0.0268533	0.4814	4.16407	1.7e-23	2.02e-22
TRIP13	0.0952971	1.81397	4.25058	1.74e-28	4.39e-26
COA1	0.894228	1.84297	1.04332	1.13e-23	1.4e-22
IFT27	1.23958	2.79839	1.17475	1.06e-23	1.33e-22
C2orf27A	0.11077	0.432374	1.96471	1.9e-08	3.42e-08
NCAPG2	0.487034	1.94475	1.99749	9.35e-22	7.4e-21
UGGT2	0.79157	1.70184	1.10431	2.18e-20	1.34e-19
CEP19	0.214934	0.541639	1.33344	2.9e-12	7.03e-12
NFYC-AS1	0.121357	0.35493	1.54828	1.43e-11	3.26e-11
ONECUT2	2.04534	4.38795	1.1012	3.02e-09	5.73e-09
PAK4	2.83753	6.25275	1.13985	1.88e-18	8.62e-18
AGAP6	0.494467	1.32148	1.41821	2.44e-17	9.84e-17
MTFP1	1.30829	3.67287	1.48923	3.93e-19	1.99e-18
CYBC1	3.59259	8.16534	1.18449	2.19e-22	1.95e-21
TRPM2	0.266569	0.700193	1.39324	5.54e-07	8.95e-07
AIMP1	6.12938	12.3548	1.01126	4.75e-24	6.52e-23
LINC00346	0.0788555	0.439876	2.47981	3.88e-10	7.9e-10
ATP6V1E1	12.7312	26.8454	1.0763	3.47e-25	7.03e-24
PPP1R37	1.5648	4.28913	1.4547	3.05e-25	6.4e-24
HSPB1P2	0.0985942	0.305393	1.6311	5.85e-12	1.38e-11
ABCB9	0.0777028	0.242127	1.63973	3.88e-14	1.11e-13
OPA3	1.47828	2.99586	1.01905	1.7e-22	1.56e-21
TMEM206	0.397479	1.60099	2.01002	9.31e-27	4.08e-25
CYSRT1	0.310588	0.781807	1.33181	2.12e-11	4.78e-11
FHDC1	0.0366349	0.256792	2.80931	1.05e-12	2.64e-12
NPM1P27	0.652171	1.8573	1.50988	2.82e-16	1.01e-15
SNTA1	5.61318	13.7923	1.29697	5.69e-16	1.96e-15
FOXK1	0.443208	1.68821	1.92944	7.21e-25	1.31e-23
TMEM171	0.9021	2.2079	1.29132	0.000146856	0.000197903
RBM39	6.87428	13.96	1.02202	1.94e-22	1.76e-21
MIR570	1.41456	3.64059	1.36382	1.68e-10	3.53e-10
PADI3	0.00200884	0.747768	8.54008	4.41e-07	7.18e-07
CNIH2	0.0596063	0.309098	2.37453	3.68e-17	1.45e-16
SELENON	5.96045	13.9486	1.22663	3.6e-17	1.42e-16
TLCD1	2.1181	9.95037	2.23198	1.02e-24	1.74e-23
AL136040.1	0.146768	0.346276	1.23839	3.04e-12	7.36e-12
TXNP6	0.0732436	0.220534	1.59023	1.55e-07	2.6e-07
SUN1	2.64708	5.90063	1.15647	8.53e-18	3.63e-17
PLPPR2	2.5946	8.78389	1.75935	1.97e-25	4.43e-24
AC008556.1	0.598515	0.237745	-1.33197	2.27e-21	1.68e-20
SAFB2	3.529	7.15372	1.01943	7.03e-25	1.28e-23
PIK3R2	0.0828012	0.305292	1.88247	2.52e-19	1.31e-18
MITD1	1.122	2.55257	1.18588	3.78e-23	4.06e-22
HGF	2.77515	1.06262	-1.38493	3.52e-20	2.08e-19
VAT1	16.3901	44.5875	1.44382	1.17e-17	4.92e-17
PACS1	2.17276	4.95364	1.18896	4.41e-15	1.38e-14
AL158152.2	0.236956	0.651298	1.4587	1.67e-10	3.5e-10
TPX2	1.22327	9.21918	2.9139	1.93e-21	1.44e-20
DPY19L1P1	0.161599	0.517842	1.6801	6.18e-24	8.28e-23
ANXA2P2	0.714882	2.37727	1.73353	9.63e-14	2.66e-13
KPTN	2.03476	4.96719	1.28757	2.33e-22	2.06e-21
AL954705.1	0.123281	0.378552	1.61855	2.44e-06	3.76e-06
APLP1	0.102402	1.41362	3.78708	3.46e-07	5.67e-07
GEMIN8P4	0.895862	1.82543	1.02689	1.07e-12	2.69e-12
ZNF138	0.77141	1.75642	1.18707	2.35e-21	1.73e-20
NDUFV2-AS1	0.314925	0.759895	1.27079	3.26e-19	1.66e-18
VIRMA	2.03805	4.79011	1.23287	5.59e-24	7.57e-23
SLC35B2	12.9342	30.4512	1.23531	4.3e-22	3.64e-21
S100A10	25.4133	95.7894	1.91428	1.88e-18	8.62e-18
RUNDC1	1.14888	2.31882	1.01317	3.4e-19	1.73e-18
TBX4	0.00149277	0.701199	8.87569	7.18e-16	2.45e-15
AL117379.1	0.126153	0.619514	2.29596	1.1e-21	8.62e-21
LINC00885	0.910271	0.422026	-1.10896	3.66e-14	1.05e-13
ABCD1	2.72137	8.41807	1.62916	5.05e-21	3.48e-20
NUMBL	0.526352	1.2342	1.22948	2.72e-10	5.6e-10
RTN4RL2	4.09973	11.0272	1.42747	9.48e-07	1.5e-06
SNORA5A	0.0968763	0.34046	1.81327	9.36e-09	1.72e-08
HBA2	19.0198	8.68618	-1.1307	4.51e-16	1.57e-15
HBB	40.9361	13.2305	-1.62951	1.47e-16	5.39e-16
NELFA	1.62816	3.73682	1.19857	1.87e-24	2.94e-23
POC1A	1.41727	4.88377	1.78488	1.03e-23	1.3e-22
AC005041.3	0.155664	0.778378	2.32203	1.92e-20	1.19e-19
CAPRIN1	7.41337	14.9288	1.00989	1.14e-18	5.37e-18
UFD1	2.92369	7.17447	1.29508	2.89e-28	5.1e-26
AC108136.1	0.0395978	0.420519	3.40868	1.49e-08	2.69e-08
OGT	2.9054	7.52033	1.37206	5.94e-21	4.04e-20
GINS3	0.175199	0.775394	2.14593	7.94e-24	1.03e-22
GIGYF1	2.93071	7.44304	1.34464	1.08e-24	1.84e-23
NPIPP1	0.538662	1.41603	1.3944	1.23e-18	5.77e-18
ARHGAP4	1.7596	5.63685	1.67964	1.27e-11	2.91e-11
GLRX2	4.42048	8.93888	1.01589	9.59e-18	4.05e-17
FADS3	1.54318	3.84837	1.31834	5.62e-20	3.22e-19
KCNJ5	0.156276	0.974231	2.64017	1.42e-17	5.89e-17
TOMM20L	0.0989345	0.21436	1.11549	1.89e-08	3.39e-08
HKDC1	2.08956	10.4314	2.31966	5.8e-11	1.27e-10
TYMP	15.6598	31.8391	1.02374	1.52e-06	2.38e-06
CKS1B	2.90484	10.9375	1.91274	1.43e-27	1.2e-25
ZNF577	0.293998	0.684495	1.21924	0.000431791	0.000562967
ZNF248	0.36918	0.904352	1.29256	1.75e-20	1.09e-19
PDCD2L	1.47357	4.14418	1.49178	9e-24	1.15e-22
TYRO3	0.196677	1.06489	2.43681	9.42e-07	1.5e-06
EIF3D	16.5831	37.2082	1.16591	1.78e-22	1.64e-21
TMEM200A	0.0769163	0.2506	1.70403	0.000150533	0.000202683
NDUFS6	27.0669	65.1519	1.26728	3.42e-22	2.96e-21
TBX15	9.27172	4.0857	-1.18225	6.78e-12	1.59e-11
ATP6V1C2	0.143977	0.471451	1.71127	3.9e-22	3.34e-21
NOSIP	5.22842	10.6397	1.02501	4.07e-19	2.05e-18
BCAN	0.0196002	0.711653	5.18224	2.02e-21	1.5e-20
BAP1	7.27858	15.1878	1.06118	1.68e-23	2e-22
AC136604.3	0.0855242	0.220578	1.36688	1.55e-11	3.54e-11
Z98884.2	0.171155	0.468987	1.45424	1.44e-11	3.29e-11
AC127496.7	0.0529705	0.283931	2.42228	2.22e-21	1.64e-20
AC003101.2	0.151484	0.355489	1.23064	1e-06	1.59e-06
IDH3G	8.88894	18.4716	1.05523	3.11e-23	3.44e-22
CKB	3.60284	23.6777	2.71632	3.2e-06	4.88e-06
SLC22A12	0.0803819	3.99158	5.63395	0.000675811	0.000869369
DEPDC1B	0.104549	1.70767	4.02977	4.04e-21	2.84e-20
CSNK2B	10.2015	23.5002	1.2039	1.79e-21	1.35e-20
PCGF1	2.26792	5.37458	1.24478	1.76e-28	4.39e-26
NSF	2.7125	6.29367	1.21428	7.64e-26	2.05e-24
RAPGEF3	0.194979	0.511706	1.392	1.9e-18	8.71e-18
RPL23AP65	0.234371	0.64639	1.46361	1.03e-08	1.89e-08
PIF1	0.0612084	0.686185	3.48679	1.78e-24	2.83e-23
C9orf152	0.198671	1.07849	2.44056	0.00359558	0.00439209
USP14	4.26853	9.39579	1.13828	2.04e-23	2.38e-22
AC108062.1	0.110032	0.41003	1.8978	2.14e-18	9.76e-18
MRPS23	2.16504	5.92594	1.45265	1.14e-27	1.02e-25
BRD3OS	0.519278	1.10489	1.08932	5.48e-11	1.2e-10
RPS27	228.963	554.647	1.27646	1.38e-18	6.47e-18
NTF3	1.41953	0.194418	-2.86819	1.89e-27	1.43e-25
MRPL13	4.54681	11.4977	1.33842	2.29e-24	3.49e-23
RAMP2	5.01426	11.0413	1.1388	2.35e-10	4.88e-10
ARPC1A	18.4505	42.8894	1.21696	2.48e-26	8.7e-25
AC008870.2	0.0839333	0.309759	1.88383	4.24e-18	1.87e-17
AC010531.6	0.378412	0.970835	1.35927	1.94e-06	3.01e-06
SIGLEC11	0.7359	0.220601	-1.73807	7.91e-18	3.38e-17
ZNF207	2.18968	4.94272	1.17459	3.52e-24	5.04e-23
SNRPEP4	0.194589	0.826381	2.08637	5.17e-21	3.56e-20
CNTD2	0.450512	1.96897	2.1278	0.00294863	0.00362492
SSR3	16.4969	34.3243	1.05704	1.52e-25	3.57e-24
AC091729.3	1.12044	2.85103	1.34742	9.19e-18	3.9e-17
AP002992.1	0.13156	0.301548	1.19667	0.000761765	0.000976928
AL392172.1	1.84866	5.77438	1.64319	2.3e-21	1.69e-20
SLBP	6.95837	16.8863	1.27903	4.1e-25	8.04e-24
BCS1L	3.22979	6.69106	1.05079	7.21e-25	1.31e-23
BTN2A1	1.95031	4.24201	1.12104	2.42e-16	8.71e-16
TREM2	1.20067	5.36834	2.16064	4.91e-13	1.27e-12
AC007292.1	0.289337	1.00211	1.79222	4.5e-19	2.25e-18
MTX3	0.776807	1.64231	1.0801	5.19e-19	2.57e-18
AC055855.1	0.0677438	0.220244	1.70094	3.56e-10	7.26e-10
QPCTL	3.33183	8.64983	1.37636	3.55e-21	2.53e-20
NAV1	0.153315	0.37831	1.30307	1.72e-10	3.61e-10
RGL2	3.14781	8.1393	1.37056	3.77e-21	2.66e-20
PPARG	2.18644	5.05185	1.20823	6.56e-11	1.43e-10
SLC25A25-AS1	0.693352	1.84266	1.41013	8.6e-10	1.71e-09
UBE2A	3.38676	8.45248	1.31947	5.26e-27	2.79e-25
UBAP1L	0.127512	0.258976	1.02218	2.64e-09	5.03e-09
POLR3K	2.48922	5.51821	1.14851	2.44e-21	1.79e-20
IGFBP3	95.5802	39.259	-1.28369	2.64e-20	1.6e-19
LIX1L	3.81202	8.67043	1.18555	4.99e-18	2.18e-17
AC079174.2	0.0483785	0.266695	2.46275	3.99e-21	2.81e-20
AC010186.3	0.124882	0.329283	1.39876	1.43e-09	2.79e-09
GTPBP4	2.53593	5.67341	1.1617	2.13e-20	1.31e-19
RCE1	1.73265	3.99878	1.20658	4.48e-20	2.6e-19
FGFR3	6.413	17.5058	1.44876	3.35e-06	5.11e-06
WASHC5	3.41387	8.94236	1.38925	3.39e-21	2.42e-20
PRKAA2	0.279372	1.62845	2.54324	2.3e-10	4.77e-10
IL1B	0.87439	0.418351	-1.06356	2.07e-10	4.32e-10
RPL37	33.2369	76.5267	1.20318	1.1e-18	5.21e-18
VMP1	10.125	20.7672	1.03638	1.06e-18	5.05e-18
SLC25A15P3	0.0554636	0.935576	4.07624	3.73e-05	5.27e-05
AFAP1-AS1	0.00512921	1.32343	8.01133	1.66e-13	4.49e-13
TRMT12	1.96052	4.14254	1.07928	8.14e-21	5.39e-20
TOX3	1.11162	2.2546	1.02021	0.00160552	0.00201078
MIR4435-2HG	0.372212	2.01448	2.43621	9.95e-23	9.68e-22
MRPL9	8.67474	21.7929	1.32897	9.91e-26	2.52e-24
NPEPL1	0.379573	1.34638	1.82664	5.88e-26	1.68e-24
BRICD5	0.257501	1.06069	2.04236	1.54e-21	1.17e-20
PPP1R35	4.48831	14.5011	1.69192	5.3e-26	1.55e-24
PEA15	12.1632	43.3682	1.83411	3.57e-27	2.16e-25
BAIAP2L1	6.71455	14.4185	1.10255	4.97e-12	1.18e-11
C18orf21	2.41604	5.05775	1.06585	5.06e-24	6.9e-23
FAM53C	1.63287	3.28997	1.01066	2.49e-18	1.13e-17
ASPHD2	0.148358	0.337786	1.18703	2.04e-05	2.93e-05
CSE1L	7.54191	18.6947	1.30963	9.04e-26	2.34e-24
AL353708.3	0.0442496	0.414772	3.22858	8.47e-26	2.22e-24
TRAF1	0.661807	1.55137	1.22906	7.11e-15	2.18e-14
RIBC2	0.0616753	0.802785	3.70225	3e-17	1.2e-16
KNTC1	0.193632	1.24766	2.68783	1.34e-23	1.64e-22
PRC1	0.237227	3.78033	3.99417	2.42e-28	4.67e-26
DLG5-AS1	0.179582	1.38574	2.94794	1.56e-23	1.87e-22
ZBTB34	0.474457	1.0889	1.19853	1.31e-14	3.91e-14
ZBTB12	0.302982	1.95374	2.68893	1.35e-22	1.27e-21
ZFP36	164.714	57.4198	-1.52034	8e-18	3.41e-17
RCN2	0.937424	2.60116	1.47238	3.46e-22	2.99e-21
TMEM241	0.41703	0.890926	1.09515	5.16e-15	1.6e-14
AC013275.1	0.0988361	0.983149	3.3143	1.05e-07	1.78e-07
RPS8	114.881	240.987	1.06882	1.54e-16	5.66e-16
KRTCAP2	2.3728	8.26586	1.80058	5.18e-29	3.24e-26
AC147055.1	0.0725806	1.23385	4.08744	3.02e-11	6.73e-11
CPEB3	4.17531	1.31087	-1.67136	9e-24	1.15e-22
AL357079.1	0.0861035	0.368536	2.09766	1.67e-18	7.7e-18
FAM49B	1.40996	4.06873	1.52892	1.65e-19	8.81e-19
ARHGEF19	0.401257	0.976214	1.28267	1.21e-06	1.91e-06
ZNF587	0.448108	1.13492	1.34067	7.24e-16	2.47e-15
LSM14B	3.93994	8.9763	1.18795	1.16e-19	6.32e-19
DNAJC10	0.953748	2.32638	1.28641	8.08e-19	3.9e-18
KLHDC3	28.1856	60.4447	1.10066	6.85e-22	5.6e-21
AP4M1	0.724887	2.09164	1.52881	9.56e-27	4.16e-25
ALG3	9.73265	23.1243	1.2485	2.11e-26	7.72e-25
MIR194-2HG	0.116312	0.468633	2.01046	6.9e-20	3.89e-19
COG5	0.851389	1.98922	1.22431	1.11e-17	4.67e-17
AL359921.1	0.104373	0.314054	1.58927	8.08e-11	1.74e-10
GAPLINC	0.0715285	0.893981	3.64365	4.51e-14	1.29e-13
GMPSP1	0.134525	0.328754	1.28914	1.66e-08	2.99e-08
GLYATL1	40.4761	13.9525	-1.53655	3.26e-24	4.71e-23
AC073573.1	0.0957012	0.253485	1.40529	0.00429123	0.00520488
EXD3	0.61272	1.23403	1.01007	3.61e-18	1.6e-17
AC119424.1	1.42721	0.665868	-1.09989	5.2e-09	9.7e-09
CPQ	11.398	26.2799	1.20518	5.05e-21	3.48e-20
GAL3ST1	0.673563	6.61014	3.2948	0.00012214	0.000165451
EMID1	0.82516	2.84707	1.78673	0.000642647	0.000827599
MEIS2	0.685581	1.56487	1.19065	4.66e-07	7.57e-07
RPL39P3	6.30189	16.6731	1.40367	2.43e-12	5.94e-12
AP001505.1	1.27871	3.85531	1.59216	1.77e-12	4.38e-12
RPL39	20.1755	46.7442	1.21219	6.01e-17	2.31e-16
KRT8P12	0.668918	2.54478	1.92764	8.8e-28	8.85e-26
CEP85	0.649521	1.90087	1.54921	3.24e-17	1.29e-16
ZNF2	0.366105	0.832799	1.18571	4.1e-25	8.04e-24
PBX2	4.73272	11.6884	1.30433	3.68e-21	2.61e-20
IDUA	1.19968	4.37066	1.8652	1.02e-25	2.56e-24
AP002748.3	0.545956	1.29413	1.24513	2.48e-14	7.26e-14
BAIAP2-DT	1.71926	4.87798	1.50449	8.92e-19	4.28e-18
U62317.4	0.0771659	0.242032	1.64916	0.00282688	0.00348113
VPS13B	0.580514	1.33072	1.19681	3.19e-16	1.13e-15
TMEM169	0.304447	0.818813	1.42734	2.98e-12	7.21e-12
AC078817.1	0.111068	0.247055	1.15339	5e-06	7.52e-06
SEZ6L2	0.588711	9.44709	4.00424	3.1e-06	4.74e-06
WNT6	0.0350523	0.470969	3.74805	4.69e-11	1.03e-10
PAK1	2.06328	4.95636	1.26434	2.19e-15	7.09e-15
CNIH3	0.14651	0.421183	1.52345	2.4e-13	6.41e-13
AC091043.1	0.793267	1.70065	1.10021	0.000395295	0.000516895
HSF4	0.461793	2.49544	2.43398	1.61e-24	2.59e-23
AL049872.1	0.215085	0.498328	1.21219	1.65e-09	3.2e-09
FBXL19	0.619604	2.15001	1.79493	1e-25	2.55e-24
FAM184A	0.411297	0.901673	1.13242	4.41e-05	6.19e-05
AL592148.3	0.136382	0.344866	1.33838	2.63e-18	1.19e-17
MUC15	0.00736855	0.444611	5.91502	0.0060515	0.00724461
CST2	0.0441158	0.639537	3.85766	3.34e-07	5.48e-07
ATP6V1E2	0.246933	0.652863	1.40266	2.92e-14	8.48e-14
CICP14	0.234336	0.650059	1.47199	5.5e-08	9.54e-08
ATP2B4	3.01654	6.55852	1.12047	1.4e-08	2.53e-08
CAMK2G	1.38271	3.21962	1.2194	1.02e-22	9.89e-22
STPG3	0.164367	0.727799	2.14662	4.76e-11	1.05e-10
AL139123.1	0.041766	0.25048	2.5843	1.65e-17	6.78e-17
RPL12P4	0.318872	0.86112	1.43324	7.14e-06	1.06e-05
THBS1	24.2153	11.9694	-1.01657	1.49e-09	2.91e-09
AL353194.1	0.23517	0.654008	1.4756	4.43e-13	1.15e-12
FAM83G	2.54648	5.51493	1.11484	4.33e-10	8.78e-10
GNL1	3.21375	6.48925	1.0138	1.64e-22	1.51e-21
XRCC3	0.214339	1.08454	2.33912	1.01e-27	9.61e-26
IL22RA1	2.74211	6.01331	1.13287	0.00114112	0.00144182
NEURL1B	1.67678	3.41407	1.0258	5.54e-09	1.03e-08
MTMR7	0.146422	0.848734	2.53518	1.88e-05	2.7e-05
AC011468.1	0.290868	1.16925	2.00715	8.44e-19	4.07e-18
KIAA1549	0.105664	0.465338	2.13879	2.13e-05	3.06e-05
FOXS1	0.173508	2.05544	3.56637	5.08e-23	5.3e-22
APOD	0.331789	1.17676	1.82648	3.76e-05	5.3e-05
AC105052.2	0.100875	0.385944	1.93583	3.93e-16	1.38e-15
SHC1	12.2651	35.709	1.54173	5.37e-26	1.57e-24
EMC3-AS1	0.03931	0.309878	2.97873	1.33e-22	1.26e-21
ENGASE	1.15552	3.58119	1.6319	1.57e-24	2.53e-23
TBXA2R	2.46967	1.09026	-1.17964	2.61e-20	1.58e-19
AC111000.4	0.122345	1.127	3.20347	1.78e-17	7.29e-17
ZMYND19	2.50469	6.47226	1.36964	6.36e-26	1.77e-24
AC099518.6	0.109961	0.230653	1.06873	0.00139605	0.0017542
MISP3	1.91561	4.06133	1.08415	7.56e-07	1.21e-06
SLC25A33	3.30723	6.94556	1.07047	1.63e-10	3.42e-10
KIF20B	0.269056	0.909038	1.75643	2.04e-16	7.37e-16
AC073548.1	0.169359	0.50163	1.56654	2.89e-17	1.15e-16
C11orf45	0.097558	0.272675	1.48285	2.93e-05	4.17e-05
S100A13	6.92204	14.4363	1.06044	4.62e-05	6.48e-05
DYNC1I1	0.0630215	1.34949	4.42042	2.21e-10	4.59e-10
COIL	2.75852	5.78392	1.06815	4.85e-22	4.07e-21
MTFR2	0.0538233	0.730913	3.7634	3.44e-26	1.12e-24
AC022167.2	0.158589	0.359017	1.17876	3.46e-16	1.22e-15
CANX	60.5452	129.987	1.10229	2e-21	1.49e-20
STARD7-AS1	0.404999	0.896532	1.14644	2.68e-23	3.02e-22
SNORA59B	0.123189	0.41166	1.74058	0.000259753	0.000344343
AC084824.1	0.259187	0.594522	1.19773	4.45e-15	1.4e-14
AL807757.2	0.0682903	0.307708	2.17181	2.8e-09	5.33e-09
GABRA3	0.00206506	0.267677	7.01816	2.8e-06	4.29e-06
UROC1	40.8458	11.9625	-1.77166	3.22e-19	1.65e-18
MELK	0.10958	2.56468	4.54873	4.98e-28	6.29e-26
ZNF786	0.790597	1.6294	1.04333	1e-19	5.51e-19
GPS1	9.4739	21.4247	1.17724	1.26e-26	5.2e-25
NVL	0.881868	2.81075	1.67232	5.05e-28	6.29e-26
HLA-G	1.26228	2.82808	1.16379	1.18e-07	1.99e-07
RPL19	185.393	377.744	1.02682	5.37e-20	3.08e-19
PPP2R5A	13.3467	28.2683	1.0827	2.9e-20	1.74e-19
NRM	1.56499	7.25384	2.21259	4.54e-21	3.16e-20
CBLN1	0.213206	0.919571	2.10871	2.02e-09	3.89e-09
TCERG1	1.10164	2.90606	1.39941	2.5e-21	1.82e-20
DKK3	1.85688	6.34734	1.77327	0.000101898	0.000139024
PBLD	36.4426	16.6248	-1.13228	1.55e-17	6.38e-17
RET	0.784301	0.272571	-1.52478	2.42e-15	7.78e-15
DOCK9-DT	0.172825	0.483847	1.48523	1.96e-12	4.83e-12
ZMYND15	0.952278	2.17165	1.18933	7.66e-05	0.000105404
ALG6	1.23511	2.68984	1.12288	2.7e-24	3.99e-23
AL359504.2	0.175786	0.544795	1.63189	6.39e-14	1.79e-13
GPRC5D-AS1	0.401211	0.934751	1.22022	1.66e-19	8.9e-19
RPS27A	57.7843	124.185	1.10375	1.67e-18	7.7e-18
TRIM52-AS1	2.19844	4.95346	1.17196	1.09e-15	3.65e-15
CFAP44	0.122056	0.388894	1.67183	1.17e-15	3.9e-15
AC141557.2	0.0315452	0.234823	2.89608	1.96e-12	4.82e-12
AL031714.1	0.101252	0.231599	1.19368	7.64e-08	1.31e-07
CPSF1	5.27087	14.7932	1.48882	5.96e-26	1.69e-24
HCFC1	2.65854	6.89358	1.37462	4.46e-24	6.19e-23
ATP5MC1	17.5014	43.3682	1.30917	1.67e-21	1.27e-20
RAVER2	0.328732	1.18641	1.85162	4.28e-06	6.46e-06
C1QTNF1-AS1	0.0698122	0.54192	2.95653	0.000449534	0.000585005
CDK6	1.39635	2.87637	1.04259	0.00698006	0.00831567
CCDC167	15.5491	42.7328	1.45851	5.81e-21	3.96e-20
RPL18P13	0.00987764	0.558885	5.82224	2.47e-12	6.04e-12
GNPDA2	0.319323	0.662431	1.05276	1.31e-10	2.77e-10
AL391244.2	0.0381039	0.249632	2.71179	1.2e-11	2.77e-11
CCL14	2.07585	0.810328	-1.35713	1.41e-19	7.58e-19
CYB561	2.61018	6.78958	1.37917	4.43e-07	7.2e-07
VN1R81P	0.0586904	0.310352	2.40271	1.58e-05	2.3e-05
PPARD	3.89903	8.03016	1.04231	1.51e-11	3.45e-11
FBXO31	5.03755	10.0784	1.00048	6.04e-05	8.37e-05
MIR4783	0.360239	1.247	1.79143	1.84e-07	3.07e-07
UQCRBP1	0.126108	0.33676	1.41706	4.54e-09	8.51e-09
AC009686.2	0.171282	0.670775	1.96945	7.12e-11	1.54e-10
MIR8071-1	1.03179	0.505508	-1.02934	9.54e-08	1.62e-07
MUTYH	1.11106	2.58264	1.21691	3.59e-21	2.55e-20
FIZ1	0.909303	1.82754	1.00707	4.78e-23	5.01e-22
UBR5-AS1	0.675682	1.83851	1.44412	1.57e-23	1.89e-22
KLHL17	0.446441	1.39874	1.64758	1.52e-23	1.83e-22
ZMIZ2	3.19388	8.3997	1.39503	3.14e-24	4.56e-23
ENOX1	0.0579891	0.321023	2.46882	5.46e-08	9.48e-08
EFCAB12	0.183825	0.603923	1.71603	0.00101483	0.00128802
AC113410.3	0.119183	0.625475	2.39178	7.55e-13	1.92e-12
MIR6753	0.0441502	0.226587	2.35957	1.26e-06	1.98e-06
TMC5	0.138808	1.85239	3.73823	0.00114605	0.00144785
KCTD13	0.870596	1.9023	1.12767	4.82e-21	3.34e-20
LYNX1	3.83905	8.72478	1.18437	4.36e-05	6.12e-05
AQP8	0.16547	3.24763	4.29475	6.46e-08	1.11e-07
PRPF6	19.1199	42.413	1.14943	3.56e-25	7.18e-24
MSH6	1.95629	4.1651	1.09023	5.56e-20	3.18e-19
RNF220	2.1237	4.68178	1.14048	2.48e-25	5.39e-24
ASS1P2	1.73174	0.222923	-2.95761	2.83e-24	4.16e-23
PCNX2	0.0758683	0.346979	2.19328	1.9e-08	3.41e-08
AC127070.1	0.0604367	0.251761	2.05856	2.47e-12	6.03e-12
AC138207.8	0.112706	0.300668	1.4156	5.34e-06	8.01e-06
AC156455.1	0.0865041	0.333726	1.94782	7.39e-05	0.000101817
Z99943.2	0.114683	0.331007	1.52921	3.46e-11	7.68e-11
HPX	1314.13	561.238	-1.22743	1.21e-21	9.42e-21
LRRC59	13.7491	29.3342	1.09325	1.95e-21	1.46e-20
ZNF503	1.10684	2.86848	1.37383	8.44e-06	1.25e-05
RNFT2	0.0313529	0.33246	3.40651	1.1e-21	8.62e-21
LAMTOR4	14.6162	36.6072	1.32456	3.31e-21	2.37e-20
VAC14-AS1	0.0503052	0.290572	2.53012	1.76e-10	3.68e-10
KIF18B	0.0543679	1.58044	4.86143	7.58e-28	8.01e-26
ADGRE1	0.541533	0.222787	-1.28138	1.39e-15	4.58e-15
AC009303.4	0.732394	1.50639	1.0404	3.86e-09	7.27e-09
CCNE1	0.131841	3.46601	4.7164	1.67e-26	6.38e-25
CEBPA	28.6667	70.4949	1.29814	2.3e-10	4.77e-10
MCCC1-AS1	0.0649523	0.301272	2.21362	6.44e-15	1.98e-14
CAPN3	0.0999575	0.232545	1.21813	3.22e-05	4.57e-05
GABPB2	0.545974	1.29399	1.24493	7.9e-19	3.82e-18
POU2F1	0.502764	1.07292	1.09359	6.13e-19	3.01e-18
UBA52P5	0.082895	0.225313	1.44257	3.24e-08	5.71e-08
SAYSD1	2.63074	6.1982	1.23638	8.39e-23	8.29e-22
ZNF852	0.132232	0.296402	1.16449	1.69e-15	5.55e-15
SNAPIN	7.60018	19.3239	1.34628	1.65e-28	4.39e-26
ATP5MC1P4	0.03902	0.458347	3.55416	9.52e-18	4.03e-17
MYH7B	0.118061	0.881385	2.90024	1.39e-06	2.19e-06
HMGA2	0.0021693	0.256211	6.88396	0.000626228	0.000806767
CDC6	0.18576	2.92373	3.9763	4.6e-27	2.52e-25
WASHC2A	2.22566	5.75526	1.37065	9.82e-24	1.24e-22
DCST2	0.0986697	0.670856	2.76532	4.3e-22	3.64e-21
CAMTA1-DT	0.242566	0.593918	1.29189	1.16e-07	1.97e-07
RACGAP1	0.413148	3.74787	3.18134	2.52e-28	4.67e-26
TAF4	0.840581	1.79689	1.09604	4.57e-18	2.01e-17
SKA3	0.0794724	1.55989	4.29485	1.75e-27	1.37e-25
ZNHIT3	1.54483	3.28996	1.09062	6.12e-26	1.72e-24
CCZ1	0.313447	0.648828	1.04961	1e-13	2.76e-13
GSN	7.90739	16.0539	1.02165	8.66e-10	1.72e-09
CD63	96.5024	205.421	1.08994	2.82e-19	1.45e-18
LOX	0.361599	1.83761	2.34537	9e-12	2.09e-11
BRCA1	0.351409	0.995991	1.50298	5.86e-12	1.38e-11
SEMA6B	1.14532	2.37538	1.0524	8.41e-12	1.96e-11
ARPC5	5.86997	14.8997	1.34386	7.64e-26	2.05e-24
SOWAHD	0.169083	0.398167	1.23564	3.78e-05	5.33e-05
SNORD14E	0.771731	1.99208	1.36811	4.13e-06	6.25e-06
SCART1	0.0761142	0.24064	1.66064	7.7e-05	0.000105912
AC007663.4	0.0955183	0.312102	1.70817	3.48e-12	8.39e-12
BMP7	0.0117189	0.312508	4.73698	0.000170444	0.00022862
SCAMP5	0.989145	4.01899	2.02258	4.22e-12	1.01e-11
AC131212.3	0.0812547	0.232896	1.51916	3.97e-09	7.48e-09
TRIM11	0.753209	2.62595	1.80172	3.34e-27	2.05e-25
RPL27	99.3531	232.728	1.22801	1e-20	6.54e-20
TLX1	0.0981722	1.09427	3.47851	4.74e-16	1.65e-15
ANGEL2	1.31484	2.83862	1.1103	9.92e-21	6.47e-20
CPSF7	4.87713	9.81058	1.0083	1.7e-19	9.08e-19
MSX1	0.179452	1.21814	2.76302	8.45e-24	1.09e-22
AC006042.1	0.156822	0.648316	2.04756	4.47e-09	8.38e-09
C5orf46	0.0263113	0.587156	4.47999	1.44e-17	5.97e-17
ADAM9	1.85823	5.52118	1.57105	1.13e-09	2.22e-09
ZNF385C	0.0493561	0.303702	2.62136	3.83e-13	1e-12
FLNC	0.171866	2.77277	4.01197	0.000210039	0.000280153
AC040970.1	0.106725	0.629852	2.56111	7.47e-06	1.11e-05
HTR3A	0.00615169	0.407324	6.04905	0.000547941	0.00070936
AL731569.1	0.0545931	0.24658	2.17527	1.23e-24	2.05e-23
SFTA1P	0.00295924	0.367185	6.95514	1.04e-27	9.66e-26
CCT2	9.76797	21.4497	1.13483	2.06e-22	1.86e-21
ZNF333	0.211814	0.441524	1.05969	5.69e-16	1.96e-15
AC027307.2	2.8922	8.62163	1.57579	4.19e-24	5.84e-23
EMD	12.7689	25.9759	1.02454	2.49e-23	2.82e-22
GLIS2-AS1	0.474826	1.67979	1.82281	4.05e-06	6.14e-06
AP001462.1	0.119994	0.303841	1.34035	6.1e-11	1.33e-10
SLC25A19	0.555922	1.62648	1.5488	3.25e-20	1.94e-19
HNRNPA1P21	0.0975184	0.414897	2.08901	3.88e-11	8.59e-11
C20orf204	0.0225253	1.16382	5.69118	3.79e-24	5.38e-23
AL157935.2	0.177106	0.425782	1.2655	1.4e-07	2.35e-07
AL590326.1	0.231712	0.771453	1.73524	1.47e-11	3.35e-11
YKT6	4.72272	13.2209	1.48513	4.08e-27	2.35e-25
ZFP69	0.429757	0.911121	1.08412	5.16e-15	1.6e-14
CEP170B	2.39606	4.98534	1.05703	1.06e-14	3.19e-14
PLD6	0.81211	1.73958	1.09899	6.28e-12	1.48e-11
CA11	0.706225	1.67101	1.24252	7.74e-05	0.000106422
AL121894.2	0.154538	0.418116	1.43594	1.12e-10	2.38e-10
ZNF337-AS1	0.141087	0.468125	1.7303	5.87e-22	4.85e-21
HASPIN	0.0293658	0.332508	3.50118	9.82e-24	1.24e-22
DDIT3	9.15751	26.0193	1.50655	3.18e-17	1.26e-16
TRIL	0.170485	0.466593	1.45252	2.49e-15	8.01e-15
NT5C3A	1.95484	4.18945	1.09971	2.24e-17	9.07e-17
KDM3B	2.73706	5.73232	1.06649	1.06e-16	3.98e-16
TMEM136	0.178455	0.731622	2.03554	9.59e-16	3.22e-15
UCHL1	0.161748	7.41082	5.51781	8.24e-08	1.41e-07
NT5M	0.40578	1.57303	1.95477	3.24e-17	1.29e-16
UBE2Q2	1.56616	4.65985	1.57305	6.95e-13	1.78e-12
SGSM2	1.03638	2.50064	1.27074	1.12e-16	4.18e-16
GARS	9.84319	23.4594	1.25297	4.58e-24	6.32e-23
RPS2P55	0.167977	0.442732	1.39817	1.63e-08	2.95e-08
SP2-AS1	0.257037	0.560248	1.12409	1.3e-11	2.98e-11
RBM8A	6.98491	15.3666	1.13748	1.03e-25	2.58e-24
TIA1	2.33213	5.50722	1.23968	4.58e-17	1.78e-16
DISC1	0.117844	0.248297	1.07519	0.00539286	0.00648308
FAM228B	0.257007	0.621835	1.27472	9.68e-13	2.44e-12
FCGBP	0.23625	1.16728	2.30476	0.00244906	0.00302928
AC136632.1	0.904673	1.83137	1.01745	7.19e-08	1.24e-07
KANSL3	2.3103	4.80347	1.056	3.48e-19	1.77e-18
VPS45	1.38762	4.78288	1.78527	1.03e-29	1.72e-26
AC060780.3	0.17829	0.521247	1.54774	1.65e-05	2.39e-05
CD70	0.0600369	0.321407	2.42048	1.61e-05	2.33e-05
ADCY10P1	0.120868	0.464042	1.94083	1.53e-18	7.08e-18
SMKR1	0.0325634	0.381133	3.54897	3.34e-10	6.84e-10
CDK5RAP1	2.33619	5.06258	1.11571	1.72e-28	4.39e-26
SNORD62B	0.244186	0.502923	1.04236	0.00618415	0.00739599
SNORA75	0.204808	0.437671	1.09558	0.000373163	0.000489012
PAXX	9.17571	20.4539	1.15649	1.73e-16	6.31e-16
ANKRD52	0.887944	3.92735	2.14501	2.9e-26	9.71e-25
AGO2	0.575442	1.88518	1.71196	3.15e-23	3.48e-22
GTF2IP23	0.290158	0.632751	1.1248	0.000246575	0.000327393
AL365203.2	0.682079	2.22808	1.70779	3.48e-15	1.1e-14
TTLL1	0.694687	2.06202	1.56963	6.77e-22	5.54e-21
PFDN4	2.53286	6.32495	1.32029	1.75e-20	1.09e-19
SLC26A6	0.401815	3.86246	3.26492	1.25e-29	1.86e-26
CCNB2	0.180669	4.06973	4.49351	9.55e-28	9.26e-26
BMF	1.06343	3.28544	1.62736	5.8e-06	8.67e-06
ABAT	53.9553	26.7336	-1.01311	3.57e-16	1.26e-15
LRFN1	0.222672	0.72596	1.70497	0.000469232	0.000610115
NCS1	0.648628	1.93134	1.57414	2.87e-06	4.4e-06
ARFIP2	3.92205	8.1603	1.05701	3.19e-23	3.51e-22
GPATCH1	0.907589	2.24999	1.30981	8.15e-26	2.15e-24
TOB2P1	0.0749858	0.692544	3.20722	5.77e-21	3.94e-20
AC020915.2	0.0599808	0.265919	2.14841	3.68e-14	1.06e-13
LINC00869	0.456079	0.98255	1.10725	1.5e-15	4.94e-15
DNAJB6	1.46502	3.29309	1.16853	2.68e-26	9.14e-25
SLC38A5	0.136407	0.597453	2.1309	3.89e-06	5.89e-06
ZEB1-AS1	0.274888	0.805408	1.55088	3.63e-22	3.13e-21
AC091133.4	0.00912608	0.511796	5.80943	1.38e-11	3.16e-11
INTS4	1.00864	2.3088	1.19473	4.35e-26	1.34e-24
C9orf116	0.34957	0.844498	1.27251	3.06e-07	5.03e-07
AC092171.5	0.415698	1.57304	1.91995	1.35e-17	5.61e-17
HRCT1	0.886395	9.44507	3.41354	1.09e-17	4.58e-17
FSTL4	0.0115572	0.42046	5.1851	1.96e-19	1.03e-18
BHLHE40-AS1	0.0747627	0.398529	2.41429	2.59e-10	5.35e-10
PHBP11	0.0957722	0.575583	2.58734	8.58e-15	2.61e-14
AC091153.1	0.377007	1.00898	1.42023	3.84e-11	8.49e-11
MTG1	0.813969	2.02262	1.31318	1.31e-19	7.11e-19
HS1BP3	2.58217	5.32503	1.04421	1.74e-19	9.27e-19
AC006077.2	0.171046	0.831331	2.28104	1.94e-21	1.45e-20
MAP1S	2.56247	5.38051	1.07021	2.31e-18	1.05e-17
RAB6B	0.158027	0.752763	2.25203	1.26e-24	2.1e-23
A4GALT	0.767553	2.39929	1.64427	2.15e-12	5.27e-12
AC009237.15	0.246232	0.665483	1.43438	5.71e-12	1.35e-11
RNF43	1.31678	4.50634	1.77494	5.97e-08	1.03e-07
FZD2	0.171947	0.686692	1.9977	1.95e-05	2.81e-05
PLSCR4	9.53148	4.08825	-1.22122	3.48e-20	2.06e-19
CCDC183	0.123626	0.557461	2.17289	1.06e-18	5.05e-18
BCORL1	0.655175	1.77264	1.43595	6.45e-14	1.81e-13
FAM110D	0.346879	0.757443	1.1267	3.37e-10	6.89e-10
QPCT	0.380154	1.55687	2.03399	3.43e-05	4.86e-05
AP001160.4	0.105343	0.318478	1.5961	3.55e-09	6.71e-09
AP001992.1	0.13441	0.565682	2.07335	1.97e-15	6.4e-15
AC005021.1	0.103979	0.247331	1.25015	1.14e-05	1.68e-05
ZNF648	0.0577355	0.398581	2.78734	0.000105129	0.000143245
AC068580.4	0.118111	0.517391	2.13111	2.7e-12	6.57e-12
[truncated: 5,501 more rows]
