# Supplementary material for: Weighted correlation gene network analysis reveals a new stemness index-related survival model for prognostic prediction in hepatocellular carcinoma
Source: Aging (Albany NY). 2020 Jul 9;12(13):13502–17. doi: 10.18632/aging.103454 (PMC7377834; doi:10.18632/aging.103454)
Supplement: Supplementary Table 2 [file aging-12-103454-s002..xlsx]

## Sheet: Supplementary table 2
Supplementary Table 2A. The gene significance and module membership scores of all genes in the purple gene modules.
probes	moduleColor	GS.mRNAsi	p.GS.mRNAsi	MMpurple	p.MMpurple
F2RL3	purple	-0.363088	2.36006e-08	0.504572	8.32316e-16
FAM78B	purple	-0.208917	0.00170713	0.405909	2.96142e-10
PAEP	purple	-0.138938	0.038155	0.382744	3.42002e-09
DLL4	purple	-0.338127	2.28953e-07	0.702618	1.6607e-34
SCN4A	purple	-0.179512	0.00719918	0.314313	1.67404e-06
CLDN5	purple	-0.246838	0.000196765	0.391411	1.39986e-09
SERHL2	purple	-0.244408	0.00022841	0.415904	9.70809e-11
CD200	purple	-0.434191	1.1446e-11	0.79019	6.87726e-49
KSR1	purple	-0.295901	6.95773e-06	0.526881	2.49642e-17
COL4A1	purple	-0.598234	4.90053e-23	0.84808	6.93469e-63
COL15A1	purple	-0.494562	3.70068e-15	0.798276	1.45637e-50
DKK2	purple	-0.477372	4.29497e-14	0.599845	3.50448e-23
SHROOM4	purple	-0.582409	1.19689e-21	0.831933	1.88675e-58
ARHGAP6	purple	-0.671286	1.43072e-30	0.829442	8.27225e-58
MCF2L	purple	-0.233964	0.000426334	0.427325	2.59296e-11
PCDH12	purple	-0.608332	5.80536e-24	0.874859	1.6303e-71
ARHGEF17	purple	-0.518767	9.20906e-17	0.671841	1.23036e-30
SEMA3F	purple	-0.0865121	0.198075	0.404621	3.40974e-10
NOTCH4	purple	-0.60266	1.942e-23	0.857402	1.09421e-65
BCL6B	purple	-0.542596	1.79973e-18	0.867449	6.12124e-69
TM4SF18	purple	-0.306762	3.03808e-06	0.435129	1.02207e-11
APOLD1	purple	-0.397353	7.47355e-10	0.629643	4.96575e-26
TTYH2	purple	-0.302964	4.07465e-06	0.620203	4.28052e-25
LZTS1	purple	-0.539124	3.25607e-18	0.834904	3.1337e-59
PDGFRB	purple	-0.607667	6.69681e-24	0.768565	9.41276e-45
HSPG2	purple	-0.618426	6.36957e-25	0.750732	1.14714e-41
FLT1	purple	-0.448128	2.05464e-12	0.75104	1.02023e-41
THSD7A	purple	-0.273145	3.55102e-05	0.389292	1.74571e-09
ACVRL1	purple	-0.43544	9.84407e-12	0.685358	2.81446e-32
DOCK6	purple	-0.446842	2.41541e-12	0.651559	2.48459e-28
ATP2B4	purple	-0.304608	3.59021e-06	0.37437	7.91207e-09
GSN	purple	-0.357997	3.81213e-08	0.473218	7.61048e-14
TRIL	purple	-0.349446	8.37203e-08	0.534331	7.29982e-18
FAM110D	purple	-0.480965	2.60201e-14	0.653693	1.449e-28
PALD1	purple	-0.526757	2.54745e-17	0.740689	4.84137e-40
IL3RA	purple	-0.312209	1.97973e-06	0.673306	8.24917e-31
CALCRL	purple	-0.530645	1.34634e-17	0.781898	3.01532e-47
SHANK3	purple	-0.220688	0.000906446	0.304032	3.75323e-06
AC007099.1	purple	-0.226089	0.000670397	0.512154	2.60109e-16
PODXL	purple	-0.51182	2.73951e-16	0.796836	2.93037e-50
THY1	purple	-0.534227	7.42732e-18	0.802357	1.94556e-51
HSPA12B	purple	-0.431003	1.67699e-11	0.706597	4.82521e-35
SCARA5	purple	-0.274758	3.1783e-05	0.403734	3.75643e-10
VCAN	purple	-0.419656	6.32636e-11	0.621122	3.4824e-25
LAMA4	purple	-0.463353	2.87181e-13	0.75997	3.1236e-43
ARHGEF15	purple	-0.606894	7.90329e-24	0.890749	1.23846e-77
PRR16	purple	-0.505998	6.70253e-16	0.851209	8.35794e-64
CCM2L	purple	-0.604942	1.19818e-23	0.796329	3.74442e-50
ADAMTS7	purple	-0.524783	3.51009e-17	0.843501	1.41061e-61
VWF	purple	-0.30533	3.39516e-06	0.341676	1.6774e-07
AC007182.2	purple	-0.0829002	0.217527	0.271566	3.95565e-05
SMOC2	purple	-0.61331	1.97142e-24	0.735312	3.3454e-39
AC100803.2	purple	-0.521352	6.09811e-17	0.698646	5.5888e-34
CA12	purple	-0.256881	0.000104541	0.462813	3.08448e-13
PCDH17	purple	-0.475167	5.82413e-14	0.786442	3.87911e-48
SLCO2A1	purple	-0.581334	1.47776e-21	0.601718	2.36757e-23
ZNF532	purple	-0.340644	1.8369e-07	0.594369	1.08717e-22
NRIP2	purple	-0.484932	1.48622e-14	0.690447	6.43232e-33
SULF1	purple	-0.419389	6.52318e-11	0.512128	2.61138e-16
GJA5	purple	-0.529383	1.65748e-17	0.771514	2.73364e-45
DPEP1	purple	-0.288835	1.17189e-05	0.51658	1.30136e-16
PTP4A2P2	purple	-0.298273	5.82264e-06	0.738271	1.16149e-39
TMOD2	purple	-0.43745	7.71328e-12	0.61148	2.93895e-24
MTMR9LP	purple	-0.506335	6.36709e-16	0.567117	2.23462e-20
SCN4B	purple	-0.378073	5.47622e-09	0.472333	8.58886e-14
NPY1R	purple	-0.398748	6.43808e-10	0.488021	9.5602e-15
PCSK1	purple	-0.229304	0.000558307	0.435715	9.52179e-12
ARHGAP18	purple	-0.282214	1.88622e-05	0.577266	3.2582e-21
SEMA3G	purple	-0.246894	0.000196089	0.359726	3.24234e-08
EMCN	purple	-0.567896	1.93209e-20	0.721987	3.30761e-37
GLDN	purple	-0.181404	0.00660194	0.439101	6.30578e-12
ESAM	purple	-0.577263	3.25991e-21	0.893875	5.99599e-79
AL031719.2	purple	-0.408197	2.30147e-10	0.530596	1.35716e-17
PRND	purple	-0.2223	0.000829004	0.40961	1.96787e-10
HEYL	purple	-0.565085	3.25976e-20	0.749359	1.93408e-41
AK8	purple	-0.263439	6.82093e-05	0.536663	4.93655e-18
ANGPT1	purple	-0.382046	3.67108e-09	0.514303	1.86068e-16
ENTPD1	purple	-0.489933	7.25888e-15	0.776695	2.97322e-46
PEAK1	purple	-0.517961	1.04632e-16	0.706705	4.66426e-35
CLEC14A	purple	-0.590265	2.50407e-22	0.860078	1.57601e-66
AFAP1L1	purple	-0.49182	5.52248e-15	0.790906	4.92267e-49
GPR4	purple	-0.507318	5.47975e-16	0.755392	1.9011e-42
RGS5	purple	-0.43645	8.71009e-12	0.771545	2.69736e-45
CD34	purple	-0.535849	5.66098e-18	0.845623	3.53516e-62
LRRC10B	purple	-0.255462	0.000114492	0.36281	2.42323e-08
BTNL9	purple	-0.132649	0.0478736	0.109116	0.104133
ARG2	purple	-0.0709361	0.291573	0.255449	0.000114589
COL4A2	purple	-0.629662	4.94445e-26	0.827557	2.49311e-57
PECAM1	purple	-0.560939	6.98824e-20	0.820763	1.19092e-55
CXorf36	purple	-0.487848	9.80069e-15	0.806437	2.47967e-52
CPXM1	purple	-0.384497	2.86068e-09	0.667441	4.03235e-30
ADCY4	purple	-0.690298	6.71929e-33	0.835704	1.92008e-59
NOTCH3	purple	-0.53467	6.89705e-18	0.82293	3.53175e-56
SH2D3C	purple	-0.576342	3.89367e-21	0.885803	1.24346e-75
NOVA2	purple	-0.584929	7.28001e-22	0.834116	5.06021e-59
EDNRA	purple	-0.515943	1.4387e-16	0.77887	1.15097e-46
SLIT3	purple	-0.579825	1.98399e-21	0.771384	2.88687e-45
AC025175.1	purple	-0.373052	9.00862e-09	0.478196	3.83059e-14
USHBP1	purple	-0.332832	3.61617e-07	0.470063	1.16915e-13
RNU5B-4P	purple	-0.314548	1.64281e-06	0.515044	1.65687e-16
TLE6	purple	-0.147406	0.0277427	0.223212	0.000787964
STC1	purple	-0.246329	0.000203035	0.3725	9.51099e-09
GJC1	purple	-0.338186	2.27788e-07	0.711654	9.7293e-36
REM1	purple	-0.517059	1.20661e-16	0.750693	1.16468e-41
CYP19A1	purple	-0.134994	0.0440323	0.383413	3.19503e-09
CDH13	purple	-0.408366	2.25887e-10	0.74508	9.63343e-41
PLAT	purple	-0.629435	5.21146e-26	0.748229	2.96447e-41
MCAM	purple	-0.4095	1.99211e-10	0.62977	4.82254e-26
NTM	purple	-0.36423	2.11688e-08	0.350855	7.3662e-08
MSRB3	purple	-0.508547	4.53973e-16	0.598761	4.3924e-23
ECSCR	purple	-0.308115	2.7337e-06	0.506469	6.23824e-16
HEG1	purple	-0.484533	1.57271e-14	0.70676	4.58435e-35
ANGPT2	purple	-0.0788895	0.240683	0.356809	4.25843e-08
PRR29	purple	-0.439265	6.18006e-12	0.680545	1.10596e-31
GABRD	purple	-0.295032	7.42413e-06	0.67308	8.77474e-31
HIGD1B	purple	-0.137005	0.0409467	0.492798	4.78986e-15
GS: gene significance; MM: module membership.
Supplementary Table 2B. The gene significance and module membership scores of all genes in the cyan gene module.
probes	moduleColor	GS.mRNAsi	p.GS.mRNAsi	MMcyan	p.MMcyan
BMPER	cyan	-0.471202	1.00182e-13	0.890296	1.90774e-77
STAB2	cyan	-0.431016	1.67443e-11	0.88108	8.34574e-74
CRHBP	cyan	-0.39954	5.91329e-10	0.865222	3.39039e-68
COLEC10	cyan	-0.446344	2.57105e-12	0.865106	3.70357e-68
FCN3	cyan	-0.387602	2.07949e-09	0.835208	2.60122e-59
GDF2	cyan	-0.392931	1.19367e-09	0.828588	1.36564e-57
CLEC1B	cyan	-0.333015	3.56014e-07	0.815967	1.65568e-54
ITGA9	cyan	-0.697712	7.41463e-34	0.807287	1.6043e-52
ZFP36	cyan	-0.4834	1.84664e-14	0.799927	6.48684e-51
GPR182	cyan	-0.545009	1.18735e-18	0.787033	2.95895e-48
DCN	cyan	-0.674102	6.63159e-31	0.784103	1.12131e-47
CXCL12	cyan	-0.62625	1.08622e-25	0.779775	7.72794e-47
INMT	cyan	-0.591966	1.7743e-22	0.735015	3.71815e-39
C11orf96	cyan	-0.501377	1.34719e-15	0.72065	5.16639e-37
NTF3	cyan	-0.534552	7.03456e-18	0.719596	7.33171e-37
ADAMTS13	cyan	-0.345314	1.21439e-07	0.716667	1.92203e-36
LIFR	cyan	-0.509441	3.95689e-16	0.70023	3.45344e-34
C7	cyan	-0.62455	1.60209e-25	0.69705	9.0511e-34
TBXA2R	cyan	-0.645418	1.14524e-27	0.69422	2.1113e-33
FAM163B	cyan	-0.443895	3.49061e-12	0.689656	8.10771e-33
OIT3	cyan	-0.307563	2.85408e-06	0.688969	9.9074e-33
DNASE1L3	cyan	-0.422197	4.71928e-11	0.672407	1.05457e-30
DPT	cyan	-0.410143	1.8547e-10	0.667567	3.89838e-30
VIPR1	cyan	-0.330501	4.41027e-07	0.662531	1.48097e-29
TCF21	cyan	-0.711182	1.13131e-35	0.661506	1.9366e-29
MMRN1	cyan	-0.597524	5.67735e-23	0.652102	2.16692e-28
FOS	cyan	-0.397348	7.47783e-10	0.643008	2.06662e-27
SOCS3	cyan	-0.409061	2.09154e-10	0.630618	3.95906e-26
CYR61	cyan	-0.489755	7.44781e-15	0.625028	1.43657e-25
RND3	cyan	-0.508037	4.90926e-16	0.622096	2.79532e-25
CCBE1	cyan	-0.331082	4.19817e-07	0.607171	7.44734e-24
FOSB	cyan	-0.368433	1.41363e-08	0.602379	2.06041e-23
EGR1	cyan	-0.401156	4.96845e-10	0.596106	7.6084e-23
NGFR	cyan	-0.563073	4.72603e-20	0.582006	1.29547e-21
NR4A3	cyan	-0.379657	4.67217e-09	0.557677	1.26374e-19
NR4A1	cyan	-0.326595	6.12868e-07	0.555176	1.98143e-19
PHLDA1	cyan	-0.392219	1.28633e-09	0.553339	2.75052e-19
EPHA2	cyan	-0.354153	5.44522e-08	0.55085	4.27638e-19
TCIM	cyan	-0.430964	1.68493e-11	0.52573	3.01064e-17
PLCXD3	cyan	-0.415289	1.0409e-10	0.502579	1.1246e-15
EGR3	cyan	-0.482809	2.00729e-14	0.500042	1.64503e-15
EGR2	cyan	-0.497708	2.32756e-15	0.485092	1.45275e-14
ADRA2B	cyan	-0.344507	1.30498e-07	0.436687	8.46354e-12
ACTA2	cyan	-0.59255	1.57586e-22	0.421479	5.12799e-11
GS: gene significance; MM: module membership.
