# Supplementary material for: Weighted correlation gene network analysis reveals a new stemness index-related survival model for prognostic prediction in hepatocellular carcinoma
Source: Aging (Albany NY). 2020 Jul 9;12(13):13502–17. doi: 10.18632/aging.103454 (PMC7377834; doi:10.18632/aging.103454)
Supplement: Supplementary Table 4 [file aging-12-103454-s003..xlsx]

## Sheet: Sheet1
Supplementary Table 4. The mRNAsi and EREG-mRNAsi of HCC samples.
TCGA_id	cancer.type	sample.type	mRNAsi	EREG-mRNAsi
TCGA-2V-A95S-01A-11R-A37K-07	LIHC	Tumor	0.402031	0.627018
TCGA-2Y-A9GS-01A-12R-A38B-07	LIHC	Tumor	0.442297	0.618124
TCGA-2Y-A9GT-01A-11R-A38B-07	LIHC	Tumor	0.300768	0.515315
TCGA-2Y-A9GU-01A-11R-A38B-07	LIHC	Tumor	0.375268	0.40588
TCGA-2Y-A9GV-01A-11R-A38B-07	LIHC	Tumor	0.310258	0.551925
TCGA-2Y-A9GW-01A-11R-A38B-07	LIHC	Tumor	0.325595	0.626503
TCGA-2Y-A9GX-01A-11R-A38B-07	LIHC	Tumor	0.256915	0.585544
TCGA-2Y-A9GY-01A-11R-A38B-07	LIHC	Tumor	0.467311	0.721172
TCGA-2Y-A9GZ-01A-11R-A39D-07	LIHC	Tumor	0.398377	0.630855
TCGA-2Y-A9H0-01A-11R-A38B-07	LIHC	Tumor	0.512639	0.521223
TCGA-2Y-A9H1-01A-11R-A38B-07	LIHC	Tumor	0.428315	0.638065
TCGA-2Y-A9H2-01A-12R-A38B-07	LIHC	Tumor	0.373168	0.485375
TCGA-2Y-A9H3-01A-11R-A38B-07	LIHC	Tumor	0.343728	0.474759
TCGA-2Y-A9H4-01A-11R-A38B-07	LIHC	Tumor	0.444588	0.718201
TCGA-2Y-A9H5-01A-11R-A38B-07	LIHC	Tumor	0.302689	0.589496
TCGA-2Y-A9H6-01A-11R-A39D-07	LIHC	Tumor	0.272553	0.473183
TCGA-2Y-A9H7-01A-11R-A39D-07	LIHC	Tumor	0.415275	0.527567
TCGA-2Y-A9H8-01A-11R-A39D-07	LIHC	Tumor	0.434945	0.475067
TCGA-2Y-A9H9-01A-21R-A39D-07	LIHC	Tumor	0.390973	0.497109
TCGA-2Y-A9HA-01A-11R-A39D-07	LIHC	Tumor	0.410491	0.585048
TCGA-2Y-A9HB-01A-11R-A39D-07	LIHC	Tumor	0.378926	0.525902
TCGA-3K-AAZ8-01A-12R-A39D-07	LIHC	Tumor	0.421625	0.688997
TCGA-4R-AA8I-01A-11R-A38B-07	LIHC	Tumor	0.394801	0.481699
TCGA-5C-A9VG-01A-11R-A37K-07	LIHC	Tumor	0.421896	0.607537
TCGA-5C-A9VH-01A-11R-A37K-07	LIHC	Tumor	0.301258	0.566114
TCGA-5C-AAPD-01A-21R-A39D-07	LIHC	Tumor	0.420491	0.687033
TCGA-5R-AA1C-01A-11R-A41C-07	LIHC	Tumor	0.422825	0.693002
TCGA-5R-AA1D-01A-11R-A38B-07	LIHC	Tumor	0.214527	0.721845
TCGA-5R-AAAM-01A-12R-A41C-07	LIHC	Tumor	0.27347	0.731396
TCGA-BC-4072-01B-11R-A155-07	LIHC	Tumor	0.337306	0.705387
TCGA-BC-4073-01B-02R-A131-07	LIHC	Tumor	0.378525	0.711994
TCGA-BC-A10Q-01A-11R-A131-07	LIHC	Tumor	0.301564	0.427818
TCGA-BC-A10R-01A-11R-A131-07	LIHC	Tumor	0.288976	0.492539
TCGA-BC-A10S-01A-22R-A131-07	LIHC	Tumor	0.309722	0.594824
TCGA-BC-A10T-01A-11R-A131-07	LIHC	Tumor	0.359388	0.744334
TCGA-BC-A10U-01A-11R-A131-07	LIHC	Tumor	0.381205	0.57927
TCGA-BC-A10W-01A-11R-A131-07	LIHC	Tumor	0.459213	0.641636
TCGA-BC-A10X-01A-11R-A131-07	LIHC	Tumor	0.279073	0.565045
TCGA-BC-A10Y-01A-11R-A131-07	LIHC	Tumor	0.46229	0.610791
TCGA-BC-A10Z-01A-11R-A131-07	LIHC	Tumor	0.466465	0.596177
TCGA-BC-A110-01A-11R-A131-07	LIHC	Tumor	0.249283	0.620483
TCGA-BC-A112-01A-11R-A131-07	LIHC	Tumor	0.4015	0.611492
TCGA-BC-A216-01A-11R-A155-07	LIHC	Tumor	0.417796	0.547873
TCGA-BC-A217-01A-11R-A155-07	LIHC	Tumor	0.472464	0.708111
TCGA-BC-A3KF-01A-11R-A213-07	LIHC	Tumor	0.402669	0.529726
TCGA-BC-A3KG-01A-11R-A213-07	LIHC	Tumor	0.454466	0.591014
TCGA-BC-A5W4-01A-11R-A28V-07	LIHC	Tumor	0.441269	0.656513
TCGA-BC-A69H-01A-11R-A311-07	LIHC	Tumor	0.462116	0.817416
TCGA-BC-A69I-01A-11R-A311-07	LIHC	Tumor	0.320756	0.641513
TCGA-BC-A8YO-01A-11R-A37K-07	LIHC	Tumor	0.450591	0.536462
TCGA-BD-A2L6-01A-11R-A213-07	LIHC	Tumor	0.422291	0.605823
TCGA-BD-A3EP-01A-11R-A22L-07	LIHC	Tumor	0.292603	0.610118
TCGA-BW-A5NO-01A-11R-A27V-07	LIHC	Tumor	0.426323	0.652451
TCGA-BW-A5NP-01A-11R-A27V-07	LIHC	Tumor	0.423895	0.606498
TCGA-BW-A5NQ-01A-11R-A27V-07	LIHC	Tumor	0.538779	0.704903
TCGA-CC-5258-01A-01R-A131-07	LIHC	Tumor	0.444544	0.683573
TCGA-CC-5259-01A-31R-A213-07	LIHC	Tumor	0.418499	0.645054
TCGA-CC-5260-01A-01R-A131-07	LIHC	Tumor	0.305092	0.557459
TCGA-CC-5261-01A-01R-A131-07	LIHC	Tumor	0.323826	0.616145
TCGA-CC-5262-01A-01R-A131-07	LIHC	Tumor	0.355584	0.749291
TCGA-CC-5263-01A-01R-A131-07	LIHC	Tumor	0.412725	0.5922
TCGA-CC-5264-01A-01R-A131-07	LIHC	Tumor	0.455408	0.542785
TCGA-CC-A123-01A-11R-A131-07	LIHC	Tumor	0.457049	0.718974
TCGA-CC-A1HT-01A-11R-A131-07	LIHC	Tumor	0.398298	0.698117
TCGA-CC-A3M9-01A-11R-A213-07	LIHC	Tumor	0.39195	0.586436
TCGA-CC-A3MA-01A-11R-A213-07	LIHC	Tumor	0.325286	0.73494
TCGA-CC-A3MB-01A-11R-A213-07	LIHC	Tumor	0.408021	0.607595
TCGA-CC-A3MC-01A-11R-A22L-07	LIHC	Tumor	0.405649	0.625826
TCGA-CC-A5UC-01A-11R-A28V-07	LIHC	Tumor	0.426954	0.693412
TCGA-CC-A5UD-01A-11R-A28V-07	LIHC	Tumor	0.359149	0.776962
TCGA-CC-A5UE-01A-11R-A28V-07	LIHC	Tumor	0.468795	0.64143
TCGA-CC-A7IE-01A-21R-A38B-07	LIHC	Tumor	0.417867	0.568657
TCGA-CC-A7IF-01A-11R-A33J-07	LIHC	Tumor	0.400888	0.583016
TCGA-CC-A7IG-01A-11R-A33J-07	LIHC	Tumor	0.422419	0.668839
TCGA-CC-A7IH-01A-11R-A33J-07	LIHC	Tumor	0.330009	0.675253
TCGA-CC-A7II-01A-11R-A33J-07	LIHC	Tumor	0.520586	0.69808
TCGA-CC-A7IJ-01A-11R-A33R-07	LIHC	Tumor	0.343349	0.581926
TCGA-CC-A7IK-01A-12R-A33R-07	LIHC	Tumor	0.428169	0.593716
TCGA-CC-A7IL-01A-11R-A33R-07	LIHC	Tumor	0.461129	0.78624
TCGA-CC-A8HS-01A-11R-A36F-07	LIHC	Tumor	0.415076	0.503476
TCGA-CC-A8HT-01A-11R-A36F-07	LIHC	Tumor	0.497121	0.666488
TCGA-CC-A8HU-01A-11R-A36F-07	LIHC	Tumor	0.452672	0.479385
TCGA-CC-A8HV-01A-11R-A36F-07	LIHC	Tumor	0.393709	0.606775
TCGA-CC-A9FS-01A-11R-A37K-07	LIHC	Tumor	0.422264	0.507298
TCGA-CC-A9FU-01A-11R-A37K-07	LIHC	Tumor	0.47313	0.602531
TCGA-CC-A9FV-01A-11R-A37K-07	LIHC	Tumor	0.19565	0.628996
TCGA-CC-A9FW-01A-11R-A37K-07	LIHC	Tumor	0.381859	0.576404
TCGA-DD-A113-01A-11R-A131-07	LIHC	Tumor	0.405739	0.557253
TCGA-DD-A114-01A-11R-A131-07	LIHC	Tumor	0.361394	0.506898
TCGA-DD-A115-01A-11R-A131-07	LIHC	Tumor	0.376121	0.488718
TCGA-DD-A116-01A-11R-A131-07	LIHC	Tumor	0.384494	0.64354
TCGA-DD-A118-01A-11R-A131-07	LIHC	Tumor	0.374641	0.515532
TCGA-DD-A119-01A-11R-A131-07	LIHC	Tumor	0.39306	0.608984
TCGA-DD-A11A-01A-11R-A131-07	LIHC	Tumor	0.426665	0.528701
TCGA-DD-A11B-01A-11R-A131-07	LIHC	Tumor	0.380867	0.54568
TCGA-DD-A11C-01A-11R-A131-07	LIHC	Tumor	0.386527	0.549391
TCGA-DD-A11D-01A-11R-A131-07	LIHC	Tumor	0.328946	0.60102
TCGA-DD-A1EA-01A-11R-A131-07	LIHC	Tumor	0.418244	0.659767
TCGA-DD-A1EB-01A-11R-A131-07	LIHC	Tumor	0.373463	0.573628
TCGA-DD-A1EC-01A-21R-A131-07	LIHC	Tumor	0.380408	0.540299
TCGA-DD-A1ED-01A-11R-A155-07	LIHC	Tumor	0.27678	0.559567
TCGA-DD-A1EE-01A-11R-A131-07	LIHC	Tumor	0.40926	0.616605
TCGA-DD-A1EF-01A-11R-A131-07	LIHC	Tumor	0.37494	0.478925
TCGA-DD-A1EG-01A-11R-A213-07	LIHC	Tumor	0.400451	0.691169
TCGA-DD-A1EH-01A-11R-A131-07	LIHC	Tumor	0.36533	0.529474
TCGA-DD-A1EI-01A-11R-A131-07	LIHC	Tumor	0.310475	0.618631
TCGA-DD-A1EJ-01A-11R-A155-07	LIHC	Tumor	0.421237	0.60287
TCGA-DD-A1EK-01A-11R-A213-07	LIHC	Tumor	0.359058	0.586784
TCGA-DD-A1EL-01A-11R-A155-07	LIHC	Tumor	0.458986	0.808061
TCGA-DD-A39V-01A-11R-A213-07	LIHC	Tumor	0.412735	0.692203
TCGA-DD-A39W-01A-11R-A213-07	LIHC	Tumor	0.361751	0.670813
TCGA-DD-A39X-01A-11R-A213-07	LIHC	Tumor	0.420783	0.682803
TCGA-DD-A39Y-01A-11R-A213-07	LIHC	Tumor	0.491216	0.678218
TCGA-DD-A39Z-01A-11R-A213-07	LIHC	Tumor	0.435936	0.608534
TCGA-DD-A3A1-01A-11R-A213-07	LIHC	Tumor	0.452212	0.675445
TCGA-DD-A3A2-01A-11R-A213-07	LIHC	Tumor	0.378895	0.547947
TCGA-DD-A3A3-01A-11R-A22L-07	LIHC	Tumor	0.442435	0.684215
TCGA-DD-A3A4-01A-11R-A22L-07	LIHC	Tumor	0.427228	0.73378
TCGA-DD-A3A5-01A-11R-A22L-07	LIHC	Tumor	0.40667	0.715284
TCGA-DD-A3A6-01A-11R-A22L-07	LIHC	Tumor	0.211989	0.536742
TCGA-DD-A3A7-01A-11R-A22L-07	LIHC	Tumor	0.451231	0.570872
TCGA-DD-A3A8-01A-11R-A22L-07	LIHC	Tumor	0.354039	0.643215
TCGA-DD-A3A9-01A-11R-A266-07	LIHC	Tumor	0.316246	0.559871
TCGA-DD-A4NA-01A-11R-A266-07	LIHC	Tumor	0.300082	0.518137
TCGA-DD-A4NB-01A-12R-A266-07	LIHC	Tumor	0.191298	0.61837
TCGA-DD-A4ND-01A-11R-A266-07	LIHC	Tumor	0.229759	0.504921
TCGA-DD-A4NE-01A-11R-A27V-07	LIHC	Tumor	0.38901	0.524692
TCGA-DD-A4NF-01A-11R-A27V-07	LIHC	Tumor	0.326269	0.569855
TCGA-DD-A4NG-01A-11R-A27V-07	LIHC	Tumor	0.359498	0.642803
TCGA-DD-A4NH-01A-11R-A27V-07	LIHC	Tumor	0.343797	0.56016
TCGA-DD-A4NI-01A-11R-A27V-07	LIHC	Tumor	0.30464	0.575653
TCGA-DD-A4NJ-01A-11R-A27V-07	LIHC	Tumor	0.389383	0.514085
TCGA-DD-A4NK-01A-11R-A28V-07	LIHC	Tumor	0.366395	0.536703
TCGA-DD-A4NL-01A-11R-A28V-07	LIHC	Tumor	0.276102	0.607002
TCGA-DD-A4NN-01A-11R-A28V-07	LIHC	Tumor	0.38072	0.582685
TCGA-DD-A4NO-01A-11R-A28V-07	LIHC	Tumor	0.34185	0.590244
TCGA-DD-A4NP-01A-11R-A28V-07	LIHC	Tumor	0.328091	0.592813
TCGA-DD-A4NQ-01A-21R-A28V-07	LIHC	Tumor	0.425754	0.636061
TCGA-DD-A4NR-01A-11R-A311-07	LIHC	Tumor	0.403023	0.662447
TCGA-DD-A4NS-01A-11R-A311-07	LIHC	Tumor	0.16707	0.536502
TCGA-DD-A4NV-01A-11R-A311-07	LIHC	Tumor	0.291854	0.59356
TCGA-DD-A73A-01A-12R-A32O-07	LIHC	Tumor	0.387149	0.646046
TCGA-DD-A73B-01A-12R-A32O-07	LIHC	Tumor	0.464943	0.553956
TCGA-DD-A73C-01A-12R-A33J-07	LIHC	Tumor	0.354957	0.504669
TCGA-DD-A73D-01A-12R-A32O-07	LIHC	Tumor	0.463902	0.687066
TCGA-DD-A73E-01A-12R-A32O-07	LIHC	Tumor	0.350253	0.595382
TCGA-DD-A73F-01A-11R-A32O-07	LIHC	Tumor	0.429181	0.640756
TCGA-DD-A73G-01A-22R-A32O-07	LIHC	Tumor	0.417478	0.626112
TCGA-DD-AA3A-01A-11R-A37K-07	LIHC	Tumor	0.377335	0.420852
TCGA-DD-AAC8-01A-11R-A41C-07	LIHC	Tumor	0.369215	0.684997
TCGA-DD-AAC9-01A-11R-A41C-07	LIHC	Tumor	0.336896	0.719177
TCGA-DD-AACA-01A-11R-A41C-07	LIHC	Tumor	0.366491	0.679449
TCGA-DD-AACB-01A-11R-A41C-07	LIHC	Tumor	0.416732	0.724028
TCGA-DD-AACC-01A-11R-A41C-07	LIHC	Tumor	0.381311	0.673082
TCGA-DD-AACD-01A-11R-A41C-07	LIHC	Tumor	0.434478	0.676864
TCGA-DD-AACE-01A-11R-A41C-07	LIHC	Tumor	0.369165	0.558936
TCGA-DD-AACF-01A-11R-A41C-07	LIHC	Tumor	0.459436	0.540684
TCGA-DD-AACG-01A-11R-A41C-07	LIHC	Tumor	0.526861	0.702585
TCGA-DD-AACH-01A-11R-A41C-07	LIHC	Tumor	0.392067	0.517656
TCGA-DD-AACI-01A-11R-A41C-07	LIHC	Tumor	0.399266	0.596836
TCGA-DD-AACJ-01A-11R-A41C-07	LIHC	Tumor	0.455669	0.639425
TCGA-DD-AACK-01A-11R-A41C-07	LIHC	Tumor	0.413389	0.665305
TCGA-DD-AACL-01A-11R-A41C-07	LIHC	Tumor	0.478641	0.633465
TCGA-DD-AACN-01A-11R-A41C-07	LIHC	Tumor	0.292954	0.56801
TCGA-DD-AACO-01A-11R-A41C-07	LIHC	Tumor	0.43894	0.567253
TCGA-DD-AACP-01A-11R-A41C-07	LIHC	Tumor	0.475997	0.663798
TCGA-DD-AACQ-01A-11R-A41C-07	LIHC	Tumor	0.407148	0.474946
TCGA-DD-AACS-01A-11R-A41C-07	LIHC	Tumor	0.423783	0.555468
TCGA-DD-AACT-01A-11R-A41C-07	LIHC	Tumor	0.346283	0.722242
TCGA-DD-AACU-01A-11R-A41C-07	LIHC	Tumor	0.358327	0.667004
TCGA-DD-AACV-01A-11R-A41C-07	LIHC	Tumor	0.496065	0.539598
TCGA-DD-AACW-01A-11R-A41C-07	LIHC	Tumor	0.439321	0.707808
TCGA-DD-AACX-01A-11R-A41C-07	LIHC	Tumor	0.438483	0.601517
TCGA-DD-AACY-01A-11R-A41C-07	LIHC	Tumor	0.375079	0.560695
TCGA-DD-AACZ-01A-11R-A41C-07	LIHC	Tumor	0.456029	0.66803
TCGA-DD-AAD0-01A-11R-A41C-07	LIHC	Tumor	0.415582	0.630225
TCGA-DD-AAD1-01A-11R-A41C-07	LIHC	Tumor	0.252927	0.599361
TCGA-DD-AAD2-01A-11R-A41C-07	LIHC	Tumor	0.317213	0.639694
TCGA-DD-AAD3-01A-11R-A41C-07	LIHC	Tumor	0.271082	0.634957
TCGA-DD-AAD5-01A-11R-A41C-07	LIHC	Tumor	0.415939	0.708823
TCGA-DD-AAD6-01A-11R-A41C-07	LIHC	Tumor	0.486117	0.526106
TCGA-DD-AAD8-01A-11R-A41C-07	LIHC	Tumor	0.410428	0.541418
TCGA-DD-AADA-01A-11R-A41C-07	LIHC	Tumor	0.309995	0.537588
TCGA-DD-AADB-01A-11R-A41C-07	LIHC	Tumor	0.43594	0.665957
TCGA-DD-AADC-01A-11R-A41C-07	LIHC	Tumor	0.441301	0.698526
TCGA-DD-AADD-01A-11R-A41C-07	LIHC	Tumor	0.482728	0.595669
TCGA-DD-AADF-01A-11R-A41C-07	LIHC	Tumor	0.480084	0.557828
TCGA-DD-AADG-01A-11R-A41C-07	LIHC	Tumor	0.370285	0.709474
TCGA-DD-AADI-01A-11R-A41C-07	LIHC	Tumor	0.351243	0.595041
TCGA-DD-AADJ-01A-11R-A41C-07	LIHC	Tumor	0.39022	0.648143
TCGA-DD-AADK-01A-11R-A41C-07	LIHC	Tumor	0.341677	0.58829
TCGA-DD-AADL-01A-11R-A41C-07	LIHC	Tumor	0.420094	0.627347
TCGA-DD-AADM-01A-11R-A41C-07	LIHC	Tumor	0.443701	0.723691
TCGA-DD-AADN-01A-11R-A41C-07	LIHC	Tumor	0.564323	0.764681
TCGA-DD-AADO-01A-11R-A41C-07	LIHC	Tumor	0.471166	0.712427
TCGA-DD-AADP-01A-11R-A39D-07	LIHC	Tumor	0.366348	0.469605
TCGA-DD-AADQ-01A-11R-A41C-07	LIHC	Tumor	0.445426	0.615308
TCGA-DD-AADR-01A-11R-A41C-07	LIHC	Tumor	0.495597	0.70242
TCGA-DD-AADS-01A-11R-A41C-07	LIHC	Tumor	0.438866	0.676328
TCGA-DD-AADU-01A-11R-A41C-07	LIHC	Tumor	0.380491	0.639485
TCGA-DD-AADV-01A-11R-A39D-07	LIHC	Tumor	0.383103	0.538913
TCGA-DD-AADW-01A-11R-A39D-07	LIHC	Tumor	0.340947	0.482302
TCGA-DD-AADY-01A-11R-A41C-07	LIHC	Tumor	0.397051	0.557781
TCGA-DD-AAE0-01A-11R-A41C-07	LIHC	Tumor	0.392651	0.622018
TCGA-DD-AAE1-01A-11R-A41C-07	LIHC	Tumor	0.412693	0.584232
TCGA-DD-AAE2-01A-11R-A41C-07	LIHC	Tumor	0.387492	0.496287
TCGA-DD-AAE3-01A-11R-A41C-07	LIHC	Tumor	0.354169	0.734094
TCGA-DD-AAE4-01A-11R-A41C-07	LIHC	Tumor	0.441972	0.709927
TCGA-DD-AAE6-01A-11R-A41C-07	LIHC	Tumor	0.514441	0.514347
TCGA-DD-AAE7-01A-11R-A41C-07	LIHC	Tumor	0.31036	0.688587
TCGA-DD-AAE9-01A-11R-A41C-07	LIHC	Tumor	0.397604	0.642454
TCGA-DD-AAEA-01A-11R-A41C-07	LIHC	Tumor	0.440954	0.591145
TCGA-DD-AAEB-01A-11R-A41C-07	LIHC	Tumor	0.367846	0.645754
TCGA-DD-AAED-01A-12R-A41C-07	LIHC	Tumor	0.420747	0.525383
TCGA-DD-AAEE-01A-11R-A41C-07	LIHC	Tumor	0.400954	0.582501
TCGA-DD-AAEG-01A-11R-A39D-07	LIHC	Tumor	0.399662	0.656322
TCGA-DD-AAEH-01A-11R-A41C-07	LIHC	Tumor	0.393716	0.595417
TCGA-DD-AAEI-01A-11R-A41C-07	LIHC	Tumor	0.463446	0.657705
TCGA-DD-AAEK-01A-11R-A41C-07	LIHC	Tumor	0.325497	0.5986
TCGA-DD-AAVP-01A-11R-A41C-07	LIHC	Tumor	0.374294	0.580822
TCGA-DD-AAVQ-01A-11R-A41C-07	LIHC	Tumor	0.376291	0.667562
TCGA-DD-AAVR-01A-11R-A41C-07	LIHC	Tumor	0.320553	0.615361
TCGA-DD-AAVS-01A-11R-A41C-07	LIHC	Tumor	0.375799	0.697052
TCGA-DD-AAVU-01A-11R-A41C-07	LIHC	Tumor	0.48823	0.681063
TCGA-DD-AAVV-01A-11R-A41C-07	LIHC	Tumor	0.328085	0.6467
TCGA-DD-AAVW-01A-11R-A41C-07	LIHC	Tumor	0.272509	0.589751
TCGA-DD-AAVX-01A-11R-A41C-07	LIHC	Tumor	0.383138	0.657738
TCGA-DD-AAVY-01A-11R-A41C-07	LIHC	Tumor	0.421612	0.669944
TCGA-DD-AAVZ-01A-11R-A41C-07	LIHC	Tumor	0.404743	0.65051
TCGA-DD-AAW0-01A-11R-A41C-07	LIHC	Tumor	0.323632	0.642756
TCGA-DD-AAW1-01A-11R-A41C-07	LIHC	Tumor	0.348154	0.578448
TCGA-DD-AAW2-01A-11R-A41C-07	LIHC	Tumor	0.379846	0.615862
TCGA-DD-AAW3-01A-11R-A41C-07	LIHC	Tumor	0.394061	0.604687
TCGA-ED-A459-01A-11R-A266-07	LIHC	Tumor	0.420213	0.550021
TCGA-ED-A4XI-01A-11R-A266-07	LIHC	Tumor	0.267619	0.589172
TCGA-ED-A5KG-01A-11R-A27V-07	LIHC	Tumor	0.322491	0.570278
TCGA-ED-A627-01A-12R-A311-07	LIHC	Tumor	0.20824	0.56004
TCGA-ED-A66X-01A-11R-A311-07	LIHC	Tumor	0.344244	0.674807
TCGA-ED-A66Y-01A-11R-A311-07	LIHC	Tumor	0.35678	0.461174
TCGA-ED-A7PX-01A-51R-A352-07	LIHC	Tumor	0.348076	0.675495
TCGA-ED-A7PY-01A-11R-A33R-07	LIHC	Tumor	0.385131	0.600201
TCGA-ED-A7PZ-01A-11R-A33R-07	LIHC	Tumor	0.438983	0.653406
TCGA-ED-A7XO-01A-11R-A352-07	LIHC	Tumor	0.377698	0.539876
TCGA-ED-A7XP-01A-11R-A352-07	LIHC	Tumor	0.352234	0.621656
TCGA-ED-A82E-01A-11R-A352-07	LIHC	Tumor	0.289304	0.631072
TCGA-ED-A8O5-01A-11R-A36F-07	LIHC	Tumor	0.364399	0.514157
TCGA-ED-A8O6-01A-11R-A36F-07	LIHC	Tumor	0.403047	0.636233
TCGA-ED-A97K-01A-21R-A38B-07	LIHC	Tumor	0.260008	0.634497
TCGA-EP-A12J-01A-11R-A131-07	LIHC	Tumor	0.378369	0.597646
TCGA-EP-A26S-01A-11R-A16W-07	LIHC	Tumor	0.377926	0.662252
TCGA-EP-A2KA-01A-11R-A180-07	LIHC	Tumor	0.406398	0.729825
TCGA-EP-A2KB-01A-11R-A180-07	LIHC	Tumor	0.382002	0.56931
TCGA-EP-A2KC-01A-11R-A213-07	LIHC	Tumor	0.352516	0.620474
TCGA-EP-A3JL-01A-11R-A213-07	LIHC	Tumor	0.39525	0.639419
TCGA-EP-A3RK-01A-11R-A22L-07	LIHC	Tumor	0.417864	0.687722
TCGA-ES-A2HS-01A-11R-A180-07	LIHC	Tumor	0.370901	0.57308
TCGA-ES-A2HT-01A-12R-A180-07	LIHC	Tumor	0.387176	0.696994
TCGA-FV-A23B-01A-11R-A16W-07	LIHC	Tumor	0.373811	0.544181
TCGA-FV-A2QQ-01A-11R-A22L-07	LIHC	Tumor	0.401455	0.674131
TCGA-FV-A2QR-01A-11R-A213-07	LIHC	Tumor	0.322481	0.671512
TCGA-FV-A3I0-01A-11R-A22L-07	LIHC	Tumor	0.254598	0.369073
TCGA-FV-A3I1-01A-11R-A22L-07	LIHC	Tumor	0.371489	0.611907
TCGA-FV-A3R2-01A-11R-A22L-07	LIHC	Tumor	0.434428	0.650305
TCGA-FV-A3R3-01A-11R-A22L-07	LIHC	Tumor	0.228859	0.647363
TCGA-FV-A495-01A-11R-A266-07	LIHC	Tumor	0.380867	0.593308
TCGA-FV-A496-01A-11R-A266-07	LIHC	Tumor	0.375097	0.519196
TCGA-FV-A4ZP-01A-12R-A266-07	LIHC	Tumor	0.480009	0.826216
TCGA-FV-A4ZQ-01A-11R-A266-07	LIHC	Tumor	0.463726	0.666089
TCGA-G3-A25S-01A-11R-A16W-07	LIHC	Tumor	0.497043	0.62029
TCGA-G3-A25T-01A-11R-A16W-07	LIHC	Tumor	0.334061	0.450455
TCGA-G3-A25U-01A-11R-A16W-07	LIHC	Tumor	0.467122	0.708159
TCGA-G3-A25V-01A-11R-A16W-07	LIHC	Tumor	0.306916	0.575341
TCGA-G3-A25X-01A-11R-A16W-07	LIHC	Tumor	0.3681	0.646277
TCGA-G3-A25Y-01A-11R-A16W-07	LIHC	Tumor	0.336551	0.701083
TCGA-G3-A25Z-01A-11R-A16W-07	LIHC	Tumor	0.39426	0.699295
TCGA-G3-A3CH-01A-11R-A22L-07	LIHC	Tumor	0.372589	0.628205
TCGA-G3-A3CI-01A-11R-A213-07	LIHC	Tumor	0.316849	0.68192
TCGA-G3-A3CJ-01A-11R-A213-07	LIHC	Tumor	0.397077	0.701896
TCGA-G3-A3CK-01A-11R-A213-07	LIHC	Tumor	0.390696	0.616701
TCGA-G3-A5SI-01A-31R-A27V-07	LIHC	Tumor	0.465125	0.508926
TCGA-G3-A5SJ-01A-11R-A27V-07	LIHC	Tumor	0.339752	0.570046
TCGA-G3-A5SK-01A-11R-A27V-07	LIHC	Tumor	0.33712	0.428232
TCGA-G3-A5SL-01A-11R-A27V-07	LIHC	Tumor	0.363978	0.711655
TCGA-G3-A5SM-01A-12R-A28V-07	LIHC	Tumor	0.341561	0.558942
TCGA-G3-A6UC-01A-21R-A33J-07	LIHC	Tumor	0.398493	0.651809
TCGA-G3-A7M5-01A-11R-A33R-07	LIHC	Tumor	0.445357	0.634396
TCGA-G3-A7M6-01A-11R-A33R-07	LIHC	Tumor	0.270556	0.492673
TCGA-G3-A7M7-01A-12R-A352-07	LIHC	Tumor	0.387499	0.697945
TCGA-G3-A7M8-01A-11R-A33R-07	LIHC	Tumor	0.337297	0.609524
TCGA-G3-A7M9-01A-23R-A352-07	LIHC	Tumor	0.465847	0.598513
TCGA-G3-AAUZ-01A-11R-A38B-07	LIHC	Tumor	0.412786	0.650547
TCGA-G3-AAV0-01A-11R-A37K-07	LIHC	Tumor	0.374233	0.469544
TCGA-G3-AAV1-01A-11R-A38B-07	LIHC	Tumor	0.389032	0.641201
TCGA-G3-AAV2-01A-11R-A37K-07	LIHC	Tumor	0.34308	0.539451
TCGA-G3-AAV3-01A-11R-A37K-07	LIHC	Tumor	0.357437	0.596443
TCGA-G3-AAV4-01A-11R-A38B-07	LIHC	Tumor	0.392326	0.646043
TCGA-G3-AAV5-01A-11R-A37K-07	LIHC	Tumor	0.456685	0.715286
TCGA-G3-AAV6-01A-21R-A37K-07	LIHC	Tumor	0.402073	0.628586
TCGA-G3-AAV7-01A-11R-A38B-07	LIHC	Tumor	0.409434	0.636403
TCGA-GJ-A3OU-01A-31R-A38B-07	LIHC	Tumor	0.292244	0.66006
TCGA-GJ-A6C0-01A-12R-A311-07	LIHC	Tumor	0.366664	0.557398
TCGA-GJ-A9DB-01A-11R-A37K-07	LIHC	Tumor	0.329618	0.568613
TCGA-HP-A5MZ-01A-21R-A27V-07	LIHC	Tumor	0.270256	0.603775
TCGA-HP-A5N0-01A-11R-A28V-07	LIHC	Tumor	0.276217	0.613346
TCGA-K7-A5RF-01A-11R-A28V-07	LIHC	Tumor	0.278351	0.638476
TCGA-K7-A5RG-01A-11R-A28V-07	LIHC	Tumor	0.400379	0.497011
TCGA-K7-A6G5-01A-11R-A311-07	LIHC	Tumor	0.356875	0.683115
TCGA-K7-AAU7-01A-11R-A38B-07	LIHC	Tumor	0.262504	0.477093
TCGA-KR-A7K0-01A-12R-A33R-07	LIHC	Tumor	0.299156	0.488858
TCGA-KR-A7K2-01A-12R-A33R-07	LIHC	Tumor	0.335199	0.485963
TCGA-KR-A7K7-01A-11R-A33J-07	LIHC	Tumor	0.480736	0.627404
TCGA-KR-A7K8-01A-11R-A33J-07	LIHC	Tumor	0.356515	0.678108
TCGA-LG-A6GG-01A-11R-A311-07	LIHC	Tumor	0.374384	0.554233
TCGA-LG-A9QC-01A-11R-A37K-07	LIHC	Tumor	0.34927	0.718598
TCGA-LG-A9QD-01A-11R-A38B-07	LIHC	Tumor	0.352649	0.569272
TCGA-MI-A75C-01A-11R-A32O-07	LIHC	Tumor	0.452562	0.665511
TCGA-MI-A75E-01A-11R-A32O-07	LIHC	Tumor	0.34176	0.684467
TCGA-MI-A75G-01A-11R-A32O-07	LIHC	Tumor	0.397396	0.567861
TCGA-MI-A75H-01A-11R-A32O-07	LIHC	Tumor	0.378784	0.672803
TCGA-MI-A75I-01A-11R-A32O-07	LIHC	Tumor	0.42521	0.613705
TCGA-MR-A520-01A-11R-A266-07	LIHC	Tumor	0.360867	0.665449
TCGA-MR-A8JO-01A-12R-A36F-07	LIHC	Tumor	0.233304	0.562461
TCGA-NI-A4U2-01A-11R-A28V-07	LIHC	Tumor	0.34791	0.543651
TCGA-NI-A8LF-01A-11R-A36F-07	LIHC	Tumor	0.280371	0.628951
TCGA-O8-A75V-01A-11R-A32O-07	LIHC	Tumor	0.361047	0.649341
TCGA-PD-A5DF-01A-11R-A27V-07	LIHC	Tumor	0.330035	0.65806
TCGA-QA-A7B7-01A-11R-A32O-07	LIHC	Tumor	0.490004	0.592619
TCGA-RC-A6M3-01A-11R-A32O-07	LIHC	Tumor	0.48241	0.673587
TCGA-RC-A6M4-01A-11R-A32O-07	LIHC	Tumor	0.426914	0.646315
TCGA-RC-A6M5-01A-11R-A32O-07	LIHC	Tumor	0.240609	0.59872
TCGA-RC-A6M6-01A-11R-A32O-07	LIHC	Tumor	0.420896	0.947825
TCGA-RC-A7S9-01A-11R-A33R-07	LIHC	Tumor	0.438522	0.393851
TCGA-RC-A7SB-01A-21R-A352-07	LIHC	Tumor	0.383447	0.739378
TCGA-RC-A7SF-01A-11R-A352-07	LIHC	Tumor	0.363764	0.508127
TCGA-RC-A7SH-01A-11R-A38B-07	LIHC	Tumor	0.407888	0.511191
TCGA-RC-A7SK-01A-11R-A352-07	LIHC	Tumor	0.39048	0.786995
TCGA-RG-A7D4-01A-12R-A33R-07	LIHC	Tumor	0.494867	0.61414
TCGA-UB-A7MA-01A-11R-A33R-07	LIHC	Tumor	0.343808	0.628105
TCGA-UB-A7MB-01A-11R-A33R-07	LIHC	Tumor	0.451733	0.550876
TCGA-UB-A7MC-01A-11R-A33R-07	LIHC	Tumor	0.432233	0.501197
TCGA-UB-A7MD-01A-12R-A352-07	LIHC	Tumor	0.338971	0.630326
TCGA-UB-A7ME-01A-11R-A33J-07	LIHC	Tumor	0.36971	0.556302
TCGA-UB-A7MF-01A-11R-A33J-07	LIHC	Tumor	0.433116	0.471944
TCGA-UB-AA0U-01A-11R-A38B-07	LIHC	Tumor	0.342683	0.541265
TCGA-UB-AA0V-01A-11R-A38B-07	LIHC	Tumor	0.268809	0.552588
TCGA-WJ-A86L-01A-12R-A39D-07	LIHC	Tumor	0.384843	0.567935
TCGA-WQ-A9G7-01A-11R-A37K-07	LIHC	Tumor	0.433125	0.488991
TCGA-WQ-AB4B-01A-11R-A41C-07	LIHC	Tumor	0.364401	0.680557
TCGA-WX-AA44-01A-11R-A39D-07	LIHC	Tumor	0.345778	0.521092
TCGA-WX-AA46-01A-11R-A39D-07	LIHC	Tumor	0.331201	0.519428
TCGA-WX-AA47-01A-11R-A39D-07	LIHC	Tumor	0.423842	0.47727
TCGA-XR-A8TC-01A-11R-A36F-07	LIHC	Tumor	0.411732	0.67142
TCGA-XR-A8TD-01A-12R-A39D-07	LIHC	Tumor	0.340037	0.748132
TCGA-XR-A8TE-01A-11R-A36F-07	LIHC	Tumor	0.27557	0.663944
TCGA-XR-A8TF-01A-11R-A36F-07	LIHC	Tumor	0.447786	0.559749
TCGA-XR-A8TG-01A-11R-A36F-07	LIHC	Tumor	0.337954	0.54024
TCGA-YA-A8S7-01A-11R-A37K-07	LIHC	Tumor	0.305094	0.611926
TCGA-ZP-A9CV-01A-11R-A38B-07	LIHC	Tumor	0.369955	0.534825
TCGA-ZP-A9CY-01A-11R-A38B-07	LIHC	Tumor	0.306329	0.562849
TCGA-ZP-A9CZ-01A-11R-A38B-07	LIHC	Tumor	0.431143	0.551008
TCGA-ZP-A9D0-01A-11R-A37K-07	LIHC	Tumor	0.372313	0.43876
TCGA-ZP-A9D1-01A-11R-A38B-07	LIHC	Tumor	0.315447	0.652754
TCGA-ZP-A9D2-01A-11R-A38B-07	LIHC	Tumor	0.325387	0.568131
TCGA-ZP-A9D4-01A-11R-A37K-07	LIHC	Tumor	0.396879	0.556434
TCGA-ZS-A9CD-01A-11R-A37K-07	LIHC	Tumor	0.326131	0.622314
TCGA-ZS-A9CE-01A-11R-A37K-07	LIHC	Tumor	0.421236	0.704698
TCGA-ZS-A9CF-01A-11R-A38B-07	LIHC	Tumor	0.394743	0.588833
TCGA-ZS-A9CG-01A-11R-A37K-07	LIHC	Tumor	0.301896	0.729936
TCGA-DD-AACA-02A-11R-A41C-07	LIHC	Tumor	0.350796	0.610683
TCGA-DD-AACA-02B-11R-A41C-07	LIHC	Tumor	0.451383	0.76922
TCGA-ZS-A9CF-02A-11R-A38B-07	LIHC	Tumor	0.433212	0.531931
TCGA-BC-A10Q-11A-11R-A131-07	LIHC	Normal	0.308141	0.509404
TCGA-BC-A10R-11A-11R-A131-07	LIHC	Normal	0.321256	0.584678
TCGA-BC-A10T-11A-11R-A131-07	LIHC	Normal	0.326759	0.525236
TCGA-BC-A10U-11A-11R-A131-07	LIHC	Normal	0.285083	0.52624
TCGA-BC-A10W-11A-11R-A131-07	LIHC	Normal	0.319543	0.620353
TCGA-BC-A10X-11A-11R-A131-07	LIHC	Normal	0.311142	0.564248
TCGA-BC-A10Y-11A-11R-A131-07	LIHC	Normal	0.298548	0.512941
TCGA-BC-A10Z-11A-11R-A131-07	LIHC	Normal	0.308926	0.467671
TCGA-BC-A110-11A-11R-A131-07	LIHC	Normal	0.337037	0.547222
TCGA-BC-A216-11A-11R-A155-07	LIHC	Normal	0.326414	0.626368
TCGA-BD-A2L6-11A-21R-A213-07	LIHC	Normal	0.277906	0.498685
TCGA-BD-A3EP-11A-12R-A22L-07	LIHC	Normal	0.316275	0.509304
TCGA-DD-A113-11A-12R-A131-07	LIHC	Normal	0.300928	0.560913
TCGA-DD-A114-11A-12R-A131-07	LIHC	Normal	0.328381	0.629541
TCGA-DD-A116-11A-12R-A26B-07	LIHC	Normal	0.330918	0.567384
TCGA-DD-A118-11A-11R-A131-07	LIHC	Normal	0.355576	0.553722
TCGA-DD-A119-11A-11R-A131-07	LIHC	Normal	0.326863	0.565931
TCGA-DD-A11A-11A-11R-A131-07	LIHC	Normal	0.32239	0.58536
TCGA-DD-A11B-11A-11R-A131-07	LIHC	Normal	0.271657	0.587357
TCGA-DD-A11C-11A-11R-A131-07	LIHC	Normal	0.317006	0.541552
TCGA-DD-A11D-11A-12R-A131-07	LIHC	Normal	0.313156	0.564489
TCGA-DD-A1EB-11A-11R-A131-07	LIHC	Normal	0.33352	0.609991
TCGA-DD-A1EC-11A-11R-A131-07	LIHC	Normal	0.283562	0.517472
TCGA-DD-A1EE-11A-11R-A131-07	LIHC	Normal	0.304526	0.530457
TCGA-DD-A1EG-11A-11R-A213-07	LIHC	Normal	0.31905	0.617336
TCGA-DD-A1EH-11A-11R-A131-07	LIHC	Normal	0.333602	0.532496
TCGA-DD-A1EI-11A-11R-A131-07	LIHC	Normal	0.33529	0.623742
TCGA-DD-A1EJ-11A-11R-A155-07	LIHC	Normal	0.326528	0.540213
TCGA-DD-A1EL-11A-11R-A155-07	LIHC	Normal	0.307443	0.56801
TCGA-DD-A39V-11A-11R-A213-07	LIHC	Normal	0.321601	0.656113
TCGA-DD-A39W-11A-11R-A213-07	LIHC	Normal	0.33436	0.603521
TCGA-DD-A39X-11A-11R-A213-07	LIHC	Normal	0.345558	0.558485
TCGA-DD-A39Z-11A-21R-A213-07	LIHC	Normal	0.329747	0.441637
TCGA-DD-A3A1-11A-11R-A213-07	LIHC	Normal	0.325649	0.522535
TCGA-DD-A3A2-11A-11R-A213-07	LIHC	Normal	0.323331	0.50594
TCGA-DD-A3A3-11A-11R-A22L-07	LIHC	Normal	0.298906	0.516629
TCGA-DD-A3A4-11A-11R-A22L-07	LIHC	Normal	0.32659	0.54803
TCGA-DD-A3A5-11A-11R-A22L-07	LIHC	Normal	0.347465	0.543524
TCGA-DD-A3A6-11A-11R-A22L-07	LIHC	Normal	0.359116	0.539396
TCGA-DD-A3A8-11A-11R-A22L-07	LIHC	Normal	0.335228	0.570889
TCGA-EP-A12J-11A-11R-A131-07	LIHC	Normal	0.334321	0.522693
TCGA-EP-A26S-11A-12R-A16W-07	LIHC	Normal	0.340917	0.573251
TCGA-EP-A3RK-11A-11R-A22L-07	LIHC	Normal	0.326423	0.588036
TCGA-ES-A2HT-11A-11R-A180-07	LIHC	Normal	0.343686	0.608077
TCGA-FV-A23B-11A-11R-A16W-07	LIHC	Normal	0.26028	0.580367
TCGA-FV-A2QR-11A-11R-A213-07	LIHC	Normal	0.236398	0.519296
TCGA-FV-A3I0-11A-11R-A22L-07	LIHC	Normal	0.335338	0.469191
TCGA-FV-A3I1-11A-11R-A22L-07	LIHC	Normal	0.305758	0.500059
TCGA-FV-A3R2-11A-11R-A22L-07	LIHC	Normal	0.309657	0.474321
TCGA-G3-A3CH-11A-11R-A22L-07	LIHC	Normal	0.329947	0.617795
HCC: hepatocellular carcinoma; LIHC: liver hepatocellular carcinoma; mRNAsi: mRNA expression-based stemness index; EREG-mRNAsi: epigenetically regulated mRNAsi.
