# Supplementary material for: Weighted correlation gene network analysis reveals a new stemness index-related survival model for prognostic prediction in hepatocellular carcinoma
Source: Aging (Albany NY). 2020 Jul 9;12(13):13502–17. doi: 10.18632/aging.103454 (PMC7377834; doi:10.18632/aging.103454)
Supplement: Supplementary Table 5 [file aging-12-103454-s004..xlsx]

## Sheet: Sheet1
Supplementary Table 5. The sample identifiers of ICGC datasets.
icgc_specimen_id	icgc_donor_id	sample
SP99273	DO45275	Normal
SP192715	DO50816	Normal
SP192687	DO48751	Normal
SP135318	DO45227	Normal
SP135231	DO45133	Normal
SP192417	DO23515	Normal
SP135229	DO45131	Normal
SP192665	DO48715	Normal
SP192693	DO50783	Normal
SP135249	DO45165	Normal
SP135221	DO45113	Normal
SP192674	DO48727	Normal
SP135314	DO45225	Normal
SP192448	DO48677	Normal
SP99331	DO45303	Normal
SP192717	DO50820	Normal
SP192690	DO48761	Normal
SP192640	DO48697	Normal
SP135245	DO45161	Normal
SP135223	DO45119	Normal
SP135219	DO45111	Normal
SP192636	DO48695	Normal
SP135344	DO45247	Normal
SP192702	DO50802	Normal
SP135206	DO45092	Normal
SP135208	DO45093	Normal
SP192700	DO50799	Normal
SP192532	DO45235	Normal
SP192420	DO45175	Normal
SP192681	DO48737	Normal
SP192438	DO45191	Normal
SP135338	DO45243	Normal
SP192263	DO23511	Normal
SP192708	DO227801	Normal
SP192696	DO50789	Normal
SP135272	DO23517	Normal
SP192261	DO227643	Normal
SP192686	DO48747	Normal
SP192679	DO48733	Normal
SP135227	DO45125	Normal
SP191959	DO45139	Normal
SP135247	DO45163	Normal
SP192680	DO48736	Normal
SP192471	DO45211	Normal
SP192649	DO45261	Normal
SP192657	DO23552	Normal
SP192537	DO23531	Normal
SP192725	DO50857	Normal
SP192457	DO48679	Normal
SP192697	DO50791	Normal
SP192694	DO50785	Normal
SP192663	DO48706	Normal
SP191843	DO45107	Normal
SP192689	DO48759	Normal
SP135210	DO45094	Normal
SP135350	DO45249	Normal
SP192427	DO45183	Normal
SP192495	DO23525	Normal
SP192644	DO23550	Normal
SP107009	DO48681	Normal
SP191879	DO45117	Normal
SP192672	DO48723	Normal
SP192523	DO23529	Normal
SP192498	DO23526	Normal
SP135361	DO45259	Normal
SP135333	DO45239	Normal
SP192723	DO50850	Normal
SP192562	DO23537	Normal
SP192703	DO50803	Normal
SP135214	DO45099	Normal
SP192556	DO23536	Normal
SP192669	DO48719	Normal
SP192712	DO50809	Normal
SP192670	DO48720	Normal
SP192699	DO50798	Normal
SP191958	DO45139	Normal
SP192666	DO48716	Normal
SP135365	DO45263	Normal
SP135259	DO45173	Normal
SP135253	DO45169	Normal
SP192541	DO23532	Normal
SP192673	DO48725	Normal
SP192698	DO50793	Normal
SP192688	DO48757	Normal
SP192395	DO45153	Normal
SP135243	DO45159	Normal
SP192671	DO48721	Normal
SP192661	DO45269	Normal
SP135377	DO45281	Normal
SP135233	DO45137	Normal
SP192631	DO45257	Normal
SP192437	DO48674	Normal
SP192485	DO45215	Normal
SP135396	DO45305	Normal
SP50140	DO23530	Normal
SP135212	DO45097	Normal
SP191892	DO45121	Normal
SP135251	DO45167	Normal
SP192603	DO23542	Normal
SP135289	DO45213	Normal
SP191868	DO45115	Normal
SP99323	DO45299	Normal
SP135329	DO45237	Normal
SP99319	DO45297	Normal
SP135384	DO45283	Normal
SP192721	DO50840	Normal
SP192692	DO50778	Normal
SP192507	DO23527	Normal
SP192709	DO50807	Normal
SP192545	DO48682	Normal
SP192415	DO48672	Normal
SP192397	DO45155	Normal
SP135283	DO45203	Normal
SP191784	DO45096	Normal
SP192662	DO48704	Normal
SP191925	DO23509	Normal
SP192442	DO23516	Normal
SP135256	DO45171	Normal
SP192664	DO48712	Normal
SP192577	DO23538	Normal
SP192695	DO50787	Normal
SP192434	DO45187	Normal
SP191761	DO45095	Normal
SP192651	DO45265	Normal
SP192411	DO23514	Normal
SP135216	DO45101	Normal
SP192548	DO23534	Normal
SP192701	DO50800	Normal
SP192654	DO45267	Normal
SP192713	DO50813	Normal
SP192593	DO23541	Normal
SP191850	DO45109	Normal
SP192605	DO23543	Normal
SP192705	DO50805	Normal
SP192718	DO50822	Normal
SP135295	DO45217	Normal
SP192480	DO23524	Normal
SP135241	DO45145	Normal
SP191982	DO23510	Normal
SP192682	DO48741	Normal
SP192704	DO50804	Normal
SP192659	DO48701	Normal
SP135353	DO45251	Normal
SP135394	DO45289	Normal
SP192555	DO23535	Normal
SP191956	DO45139	Normal
SP192691	DO50774	Normal
SP192668	DO48717	Normal
SP135300	DO45219	Normal
SP135392	DO45287	Normal
SP135279	DO45197	Normal
SP135203	DO45091	Normal
SP135235	DO45141	Normal
SP135358	DO45253	Normal
SP192719	DO50825	Normal
SP192727	DO50859	Normal
SP191914	DO23508	Normal
SP192439	DO45193	Normal
SP192619	DO23545	Normal
SP192678	DO48732	Normal
SP135341	DO45245	Normal
SP192454	DO45199	Normal
SP135322	DO45231	Normal
SP192405	DO23513	Normal
SP192655	DO48700	Normal
SP135263	DO45189	Normal
SP135401	DO45307	Normal
SP192675	DO48728	Normal
SP192422	DO45179	Normal
SP192724	DO50855	Normal
SP192683	DO48743	Normal
SP192685	DO48746	Normal
SP192511	DO23528	Normal
SP135269	DO45195	Normal
SP192627	DO23548	Normal
SP135306	DO45221	Normal
SP192543	DO23533	Normal
SP192445	DO23518	Normal
SP192716	DO50818	Normal
SP192711	DO50808	Normal
SP192425	DO45181	Normal
SP135237	DO45143	Normal
SP192469	DO45209	Normal
SP192390	DO23512	Normal
SP192652	DO23551	Normal
SP192419	DO45173	Normal
SP192706	DO50806	Normal
SP135309	DO45223	Normal
SP191939	DO45135	Normal
SP192720	DO50832	Normal
SP192676	DO48730	Normal
SP135261	DO45177	Normal
SP135368	DO45277	Normal
SP135370	DO45279	Normal
SP192393	DO45149	Normal
SP135385	DO45285	Normal
SP135218	DO45103	Normal
SP192477	DO23523	Normal
SP192464	DO23519	Normal
SP191903	DO45127	Normal
SP191920	DO45129	Normal
SP135225	DO45123	Normal
SP99137	DO45207	Tumor
SP99213	DO45245	Tumor
SP50153	DO23536	Tumor
SP50139	DO23529	Tumor
SP99325	DO45299	Tumor
SP98913	DO45097	Tumor
SP50149	DO23534	Tumor
SP99053	DO45165	Tumor
SP112184	DO45139	Tumor
SP50109	DO23514	Tumor
SP99077	DO45177	Tumor
SP98985	DO45133	Tumor
SP99189	DO45233	Tumor
SP99113	DO45195	Tumor
SP99065	DO45171	Tumor
SP107104	DO48733	Tumor
SP99275	DO45275	Tumor
SP112208	DO50813	Tumor
SP99173	DO45225	Tumor
SP99237	DO45257	Tumor
SP98900	DO45093	Tumor
SP107136	DO48751	Tumor
SP112228	DO50822	Tumor
SP98959	DO45121	Tumor
SP107004	DO48677	Tumor
SP107007	DO48679	Tumor
SP50159	DO23539	Tumor
SP98896	DO45091	Tumor
SP112192	DO50805	Tumor
SP107132	DO48747	Tumor
SP99229	DO45253	Tumor
SP99221	DO45249	Tumor
SP107109	DO48736	Tumor
SP107056	DO48706	Tumor
SP98967	DO45125	Tumor
SP99109	DO45193	Tumor
SP50185	DO23552	Tumor
SP99011	DO45145	Tumor
SP99271	DO45273	Tumor
SP107037	DO48695	Tumor
SP99089	DO45183	Tumor
SP107101	DO48732	Tumor
SP107091	DO48727	Tumor
SP107123	DO48743	Tumor
SP99037	DO45157	Tumor
SP107152	DO48760	Tumor
SP112288	DO50850	Tumor
SP112304	DO50857	Tumor
SP112300	DO50855	Tumor
SP107063	DO48712	Tumor
SP112219	DO50818	Tumor
SP99209	DO45243	Tumor
SP50107	DO23513	Tumor
SP99279	DO45277	Tumor
SP112188	DO50803	Tumor
SP99169	DO45223	Tumor
SP99097	DO45187	Tumor
SP107010	DO48681	Tumor
SP99045	DO45161	Tumor
SP112138	DO50778	Tumor
SP99185	DO45231	Tumor
SP107111	DO48737	Tumor
SP99321	DO45297	Tumor
SP50105	DO23512	Tumor
SP99033	DO45155	Tumor
SP112276	DO50845	Tumor
SP112168	DO50793	Tumor
SP99069	DO45173	Tumor
SP99105	DO45191	Tumor
SP112221	DO50819	Tumor
SP112273	DO50844	Tumor
SP112182	DO50800	Tumor
SP107088	DO48725	Tumor
SP50157	DO23538	Tumor
SP99003	DO45141	Tumor
SP112186	DO50802	Tumor
SP107071	DO48716	Tumor
SP50167	DO23543	Tumor
SP98898	DO45092	Tumor
SP112234	DO50825	Tumor
SP112215	DO50816	Tumor
SP112241	DO50829	Tumor
SP112190	DO50804	Tumor
SP107076	DO48719	Tumor
SP99125	DO45201	Tumor
SP99153	DO45215	Tumor
SP99305	DO45289	Tumor
SP112213	DO50815	Tumor
SP99337	DO45305	Tumor
SP107052	DO48704	Tumor
SP50163	DO23541	Tumor
SP112178	DO50798	Tumor
SP99289	DO45281	Tumor
SP50133	DO23526	Tumor
SP191990	DO227643	Tumor
SP98973	DO45127	Tumor
SP99205	DO45241	Tumor
SP99157	DO45217	Tumor
SP192707	DO227801	Tumor
SP98981	DO45131	Tumor
SP50173	DO23546	Tumor
SP98921	DO45101	Tumor
SP99061	DO45169	Tumor
SP192387	DO45147	Tumor
SP99287	DO45281	Tumor
SP50171	DO23545	Tumor
SP50131	DO23525	Tumor
SP99093	DO45185	Tumor
SP50151	DO23535	Tumor
SP50103	DO23511	Tumor
SP99161	DO45219	Tumor
SP112180	DO50799	Tumor
SP107073	DO48717	Tumor
SP112224	DO50820	Tumor
SP50155	DO23537	Tumor
SP98989	DO45135	Tumor
SP50143	DO23531	Tumor
SP107078	DO48720	Tumor
SP107041	DO48697	Tumor
SP99341	DO45307	Tumor
SP107084	DO48723	Tumor
SP98925	DO45103	Tumor
SP112310	DO50859	Tumor
SP98997	DO45139	Tumor
SP99073	DO45175	Tumor
SP98927	DO45105	Tumor
SP112201	DO50809	Tumor
SP99333	DO45303	Tumor
SP112248	DO50832	Tumor
SP107129	DO48746	Tumor
SP99121	DO45199	Tumor
SP107047	DO48701	Tumor
SP112261	DO50839	Tumor
SP50137	DO23528	Tumor
SP99019	DO45149	Tumor
SP107097	DO48730	Tumor
SP106993	DO48672	Tumor
SP99257	DO45267	Tumor
SP106998	DO48674	Tumor
SP50177	DO23548	Tumor
SP112170	DO50793	Tumor
SP99007	DO45143	Tumor
SP99081	DO45179	Tumor
SP99193	DO45235	Tumor
SP112211	DO50814	Tumor
SP50127	DO23523	Tumor
SP192714	DO50814	Tumor
SP99249	DO45263	Tumor
SP50123	DO23521	Tumor
SP99149	DO45213	Tumor
SP112205	DO50811	Tumor
SP107121	DO48742	Tumor
SP192726	DO50859	Tumor
SP107150	DO48759	Tumor
SP99177	DO45227	Tumor
SP99301	DO45287	Tumor
SP99181	DO45229	Tumor
SP98953	DO45117	Tumor
SP99049	DO45163	Tumor
SP50145	DO23532	Tumor
SP107155	DO48761	Tumor
SP107032	DO48693	Tumor
SP99133	DO45205	Tumor
SP112160	DO50789	Tumor
SP99201	DO45239	Tumor
SP107068	DO48715	Tumor
SP99101	DO45189	Tumor
SP99329	DO45301	Tumor
SP99233	DO45255	Tumor
SP107012	DO48682	Tumor
SP112130	DO50774	Tumor
SP99269	DO45273	Tumor
SP99085	DO45181	Tumor
SP50117	DO23518	Tumor
SP112196	DO50807	Tumor
SP98933	DO45107	Tumor
SP50135	DO23527	Tumor
SP112147	DO50783	Tumor
SP50101	DO23510	Tumor
SP99217	DO45247	Tumor
SP107080	DO48721	Tumor
SP98937	DO45109	Tumor
SP50111	DO23515	Tumor
SP98955	DO45119	Tumor
SP112217	DO50817	Tumor
SP50161	DO23540	Tumor
SP98965	DO45123	Tumor
SP99297	DO45285	Tumor
SP112152	DO50785	Tumor
SP98991	DO45137	Tumor
SP50175	DO23547	Tumor
SP99197	DO45237	Tumor
SP99057	DO45167	Tumor
SP99001	DO45141	Tumor
SP99283	DO45279	Tumor
SP99245	DO45261	Tumor
SP99225	DO45251	Tumor
SP50115	DO23517	Tumor
SP99241	DO45259	Tumor
SP192418	DO45173	Tumor
SP50129	DO23524	Tumor
SP98949	DO45115	Tumor
SP112165	DO50791	Tumor
SP50181	DO23550	Tumor
SP98902	DO45094	Tumor
SP99253	DO45265	Tumor
SP107146	DO48757	Tumor
SP98907	DO45096	Tumor
SP50119	DO23519	Tumor
SP50169	DO23544	Tumor
SP107044	DO48700	Tumor
SP99145	DO45211	Tumor
SP112194	DO50806	Tumor
SP98945	DO45113	Tumor
SP112156	DO50787	Tumor
SP50183	DO23551	Tumor
SP50147	DO23533	Tumor
SP99265	DO45139	Tumor
SP112210	DO50814	Tumor
SP99029	DO45153	Tumor
SP99041	DO45159	Tumor
SP99293	DO45283	Tumor
SP50179	DO23549	Tumor
SP99129	DO45203	Tumor
SP98915	DO45099	Tumor
SP112198	DO50808	Tumor
SP107094	DO48728	Tumor
SP112265	DO50840	Tumor
SP99117	DO45197	Tumor
SP99261	DO45269	Tumor
SP107119	DO48741	Tumor
SP98941	DO45111	Tumor
SP98904	DO45095	Tumor
SP50141	DO23530	Tumor
SP98909	DO45096	Tumor
SP50165	DO23542	Tumor
SP99141	DO45209	Tumor
SP99165	DO45221	Tumor
SP50097	DO23508	Tumor
SP112133	DO50776	Tumor
SP98975	DO45129	Tumor
SP50113	DO23516	Tumor
SP50099	DO23509	Tumor
ICGC: International Cancer Genome Consortium.
